# Supplementary material for: TEMPO/PhI(OAc)2 promotes the α-aminophosphinoylation of alcohols with amines and H-phosphine oxides in aqueous medium
Source: Royal Society of Chemistry journal article supplement (doi:10.1039/d4ob00302k), 2024-01-01

## Supplementary Information

### TEMPO/PhI(OAc)<sub>2</sub> promoted the $\alpha$ -aminophosphinylation of alcohols with amines and H-phosphine oxides in the aqueous medium

Qiang Huang<sup>\*,a</sup>, Xin Jin<sup>a</sup>, Lvjia Wu<sup>a</sup>, Jiangdong Li<sup>b</sup>, Qianlu Xing<sup>c</sup>, Xianheng Wang<sup>a</sup>, Changkuo Zhao<sup>\*,a</sup>

<sup>a</sup> School of pharmacy, Zunyi Medical University, Zunyi, Guizhou 563000, P. R. China.

<sup>b</sup> School of public health, Zunyi Medical University, Zunyi, Guizhou 563000, P. R. China.

<sup>c</sup> Department of Pediatric, the Second Affiliated Hospital of Zunyi Medical University, Zunyi, Guizhou, 563000, P. R. China.

\*Corresponding Author: Telephone number: +86-180-0817-3208

E-mail address: [huangqiang65@sina.com](mailto:huangqiang65@sina.com)

## Table of contents

|                                                                               |    |
|-------------------------------------------------------------------------------|----|
| <b>1. General information</b> .....                                           | 2  |
| <b>2. Experimental Section</b> .....                                          | 2  |
| <b>2.1 General procedure for the synthesis of compounds 4, 5, and 6</b> ..... | 2  |
| <b>2.2 Control experiment</b> .....                                           | 2  |
| <b>3. Characterization data of compounds 4, 5, 6</b> .....                    | 9  |
| <b>4. NMR spectra for products 4, 5, 6</b> .....                              | 22 |

## 1. General information

All commercially available reagent grade chemicals were purchased from BenTu Reagent, Acros, and Alfa Aesar Chemical Company and used as received without further purification unless otherwise stated.  $^1\text{H}$ ,  $^{13}\text{C}$ ,  $^{31}\text{P}$  and  $^{19}\text{F}$  NMR spectra were recorded in  $\text{CDCl}_3$  on bruker advance 400 MHz NMR at room temperature, the chemical shifts ( $\delta$ ) were expressed in ppm and  $J$  values were given in Hz. The following abbreviations are used to indicate the multiplicity: singlet (s), doublet (d), triplet (t), quartet (q), doublet of doublets (dd), doublet of triplets (dt), and multiplet (m). All first order splitting patterns were assigned on the basis of the appearance of the multiplet. Splitting patterns that could not be easily interpreted were designated as multiplet (m). High resolution mass spectra (HRMS) were obtained on a Waters UPLC-Xevo TQMS (PDA Detector) / Quattro Premier XE triquadrupole mass spectrometer by ESI method. Flash column chromatography was conducted on silica gel(200-300 mesh).

## 2. Experimental Section

### 2.1 General procedure for the synthesis of compounds 4, 5, and 6

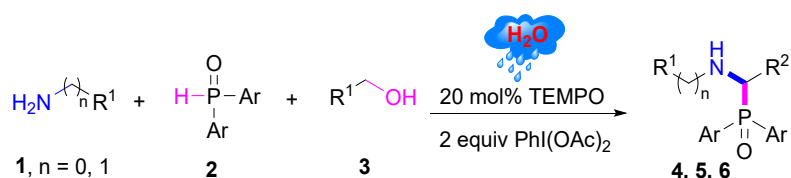

Alcohols (**3**, 0.5 mL), amines (**1**, 1 mmol), H-phosphine oxides (**2**, 2.5 mmol),  $\text{PhI}(\text{OAc})_2$  (2 mmol, 2 equiv), TEMPO (0.2 mmol) and  $\text{H}_2\text{O}$  (4 mL) were dissolved in sealed tube and stirring at 25 °C for 5 h. After completion of reaction, the mixture was quenched with sodium bicarbonate (20 mL), extracted with ethyl acetate ( $3 \times 10$  mL). The combined organic layers were washed with saturated brine twice, and dried over anhydrous  $\text{MgSO}_4$ . After filtration, the solvent was evaporated in vacuum. The crude product was purified by silica gel chromatography (DCM : methanol = 50:1) to give the desired compounds **4**, **5** and **6**.

### 2.2 Control experiment

#### (a) the detection of *n*-butyl aldehyde

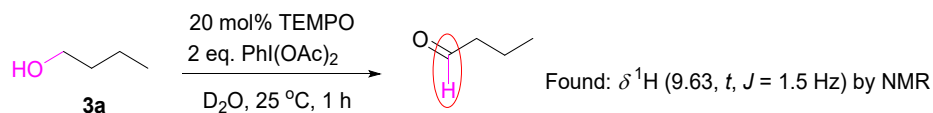

*n*-Butyl alcohol (**3a**, 0.5 mL), PhI(OAc)<sub>2</sub> (2 mmol, 2 equiv), TEMPO (0.2 mmol) and D<sub>2</sub>O (4 mL) were dissolved in sealed tube and stirring at 25 °C for 1 h. The mixture was detected by NMR analysis in DMSO-*d*<sub>6</sub>, and the result was recorded in Figure S1a.

**(b) the detection of imine**

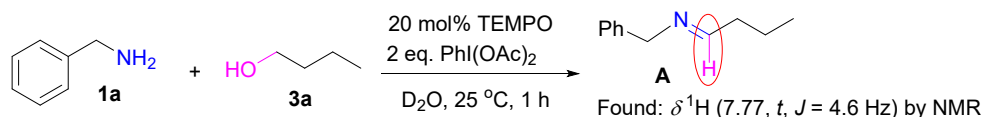

*n*-Butyl alcohols (**3a**, 0.5 mL), benzylamine (**1a**, 1 mmol), PhI(OAc)<sub>2</sub> (2 mmol, 2 equiv), TEMPO (0.2 mmol) and D<sub>2</sub>O (4 mL) were dissolved in sealed tube and stirring at 25 °C for 1 h. The mixture was detected by NMR analysis in DMSO-*d*<sub>6</sub>, and the result was recorded in Figure S1b.

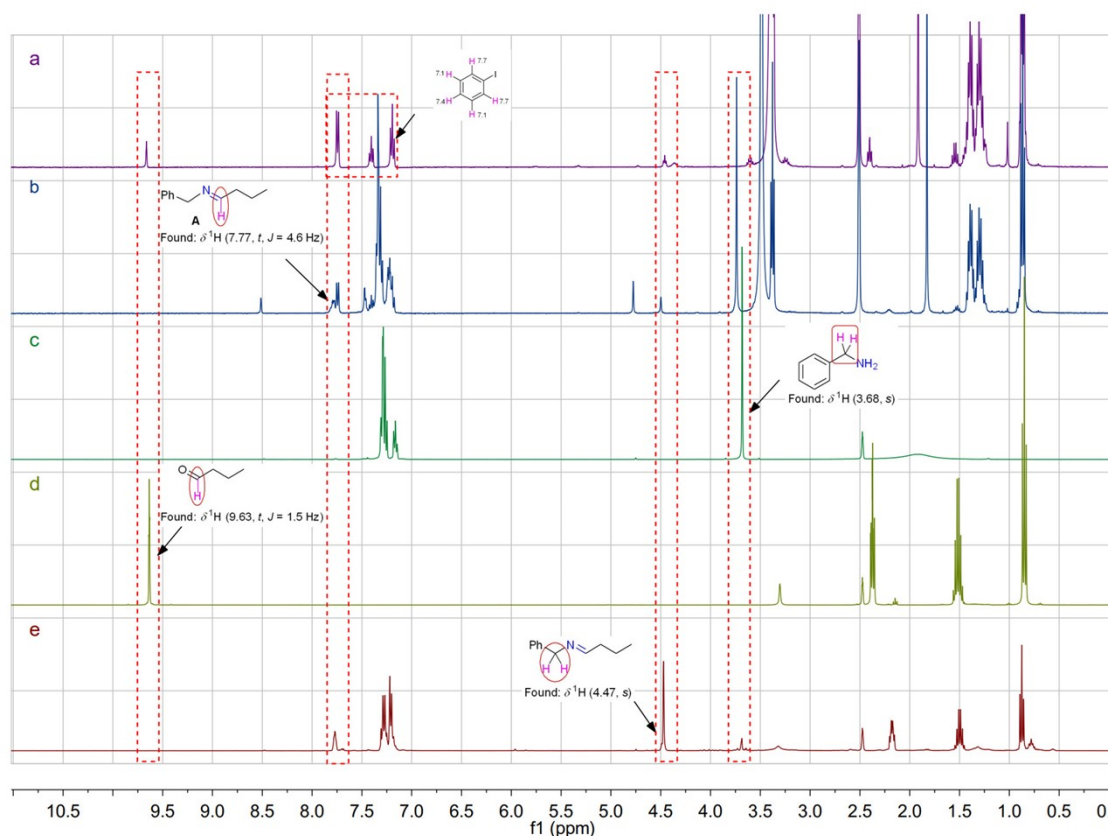

Figure S1 NMR analysis of control experiment. (a: the mixture of control experiment (a); b: the mixture of control experiment (b); c: standard substance benzylamine; d: standard substance *n*-butyl aldehyde; e: the mixture of reaction

between benzylamine and *n*-butyl aldehyde in absence of TEMPO and  $\text{PhI}(\text{OAc})_2$   
 under a solvent-free condition )

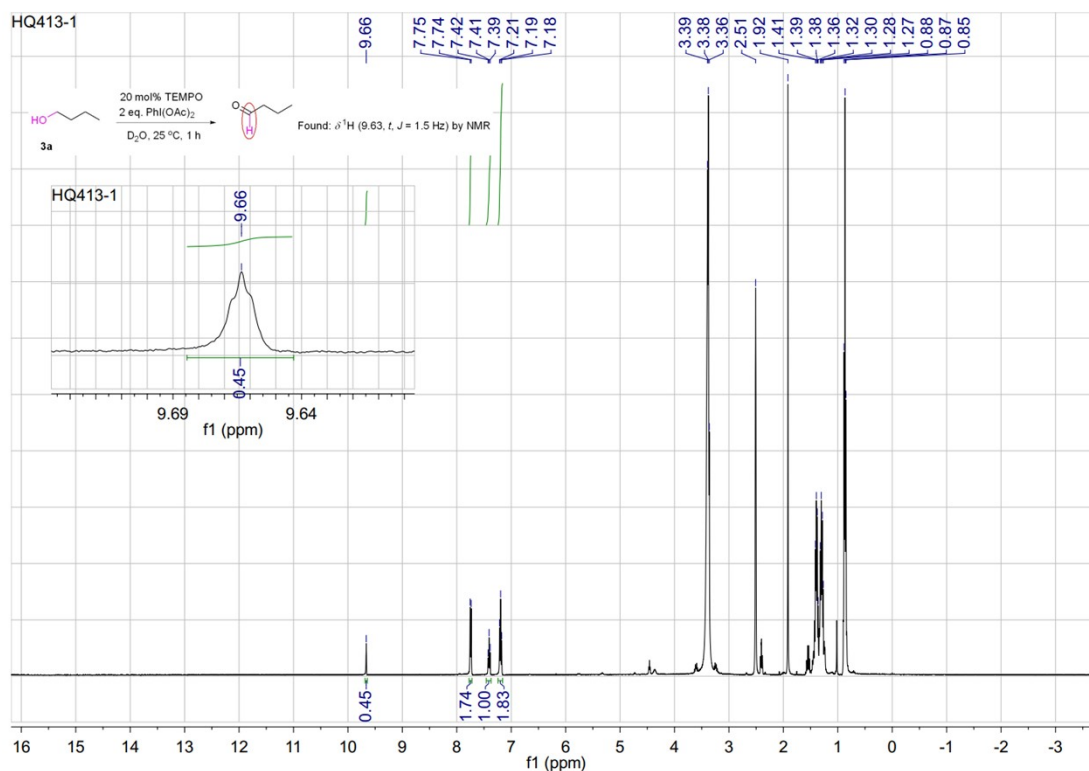

Figure S1a the mixture of control experiment (a)

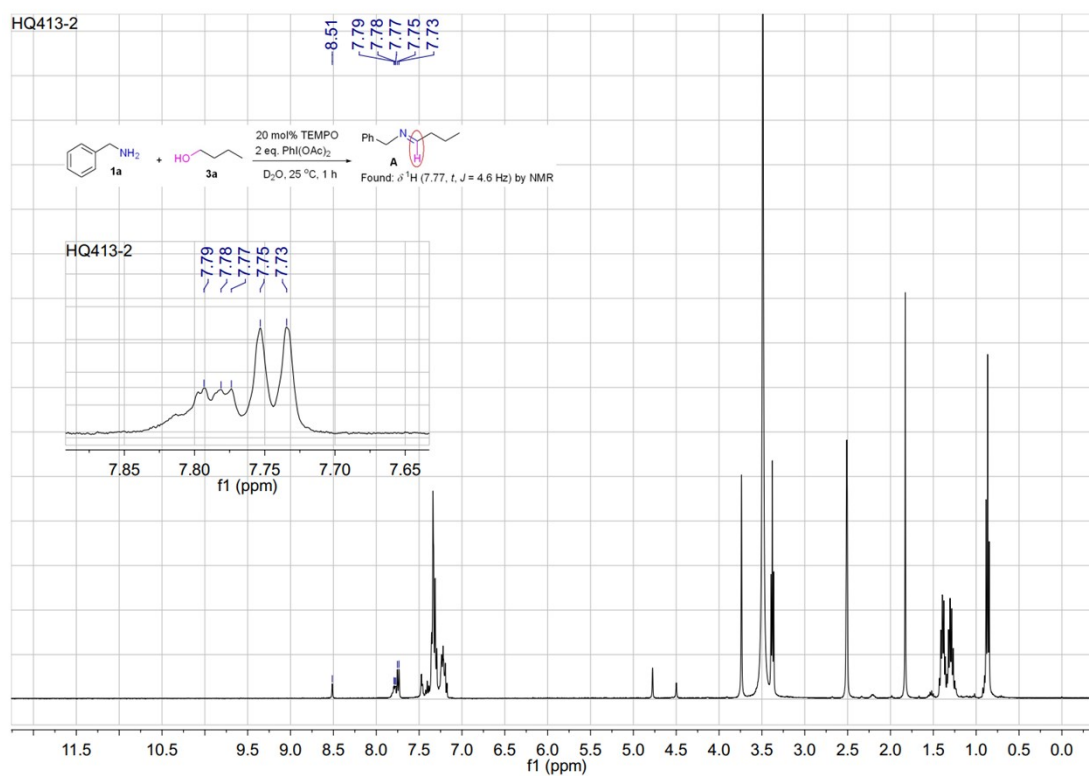

Figure S1b the mixture of control experiment (b)

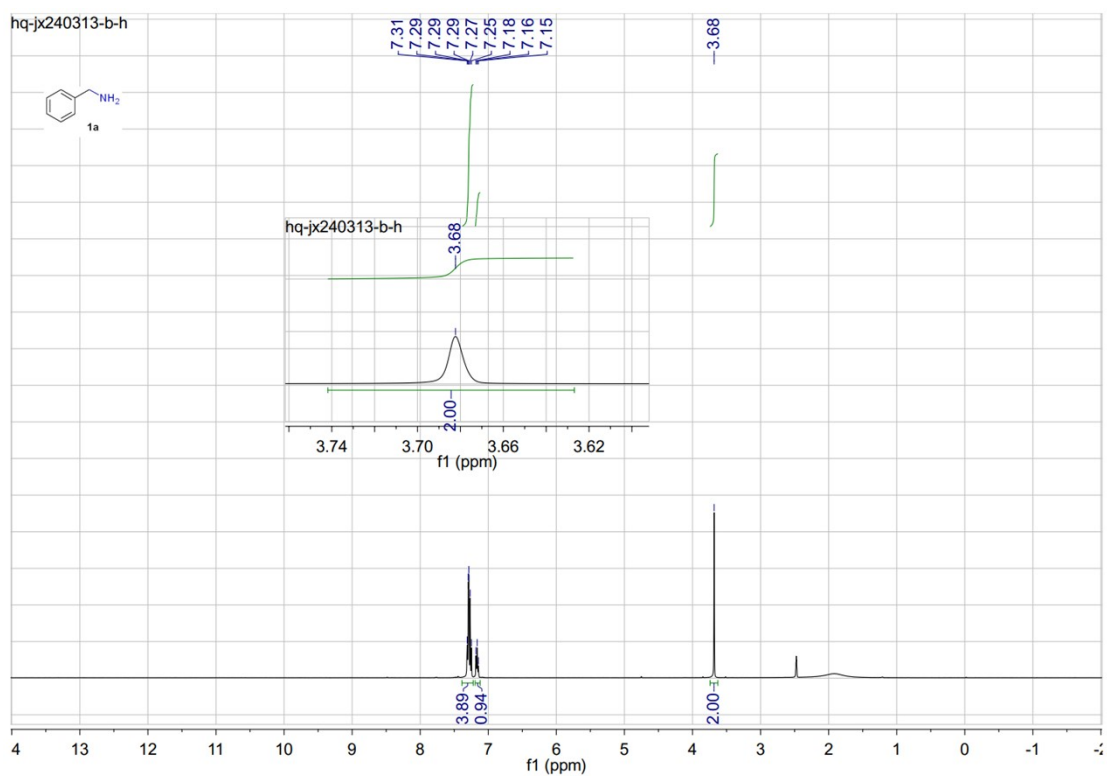

Figure S1c standard substance benzylamine

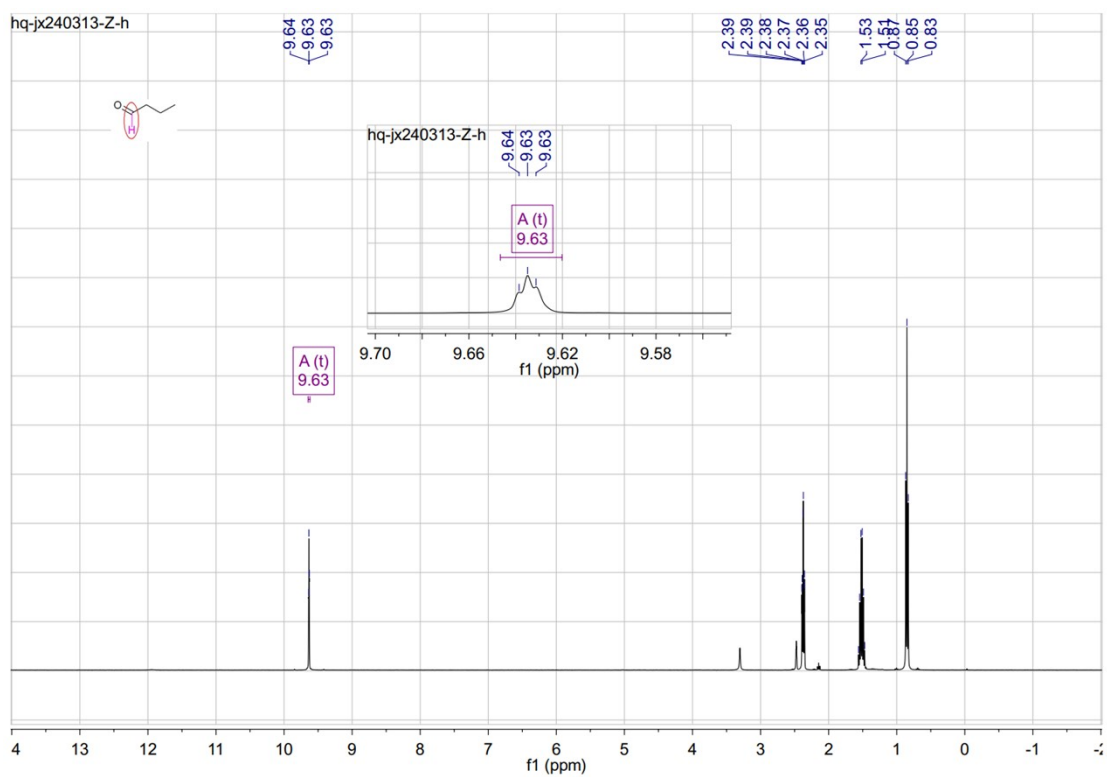

Figure S1d standard substance *n*-butyl aldehyde

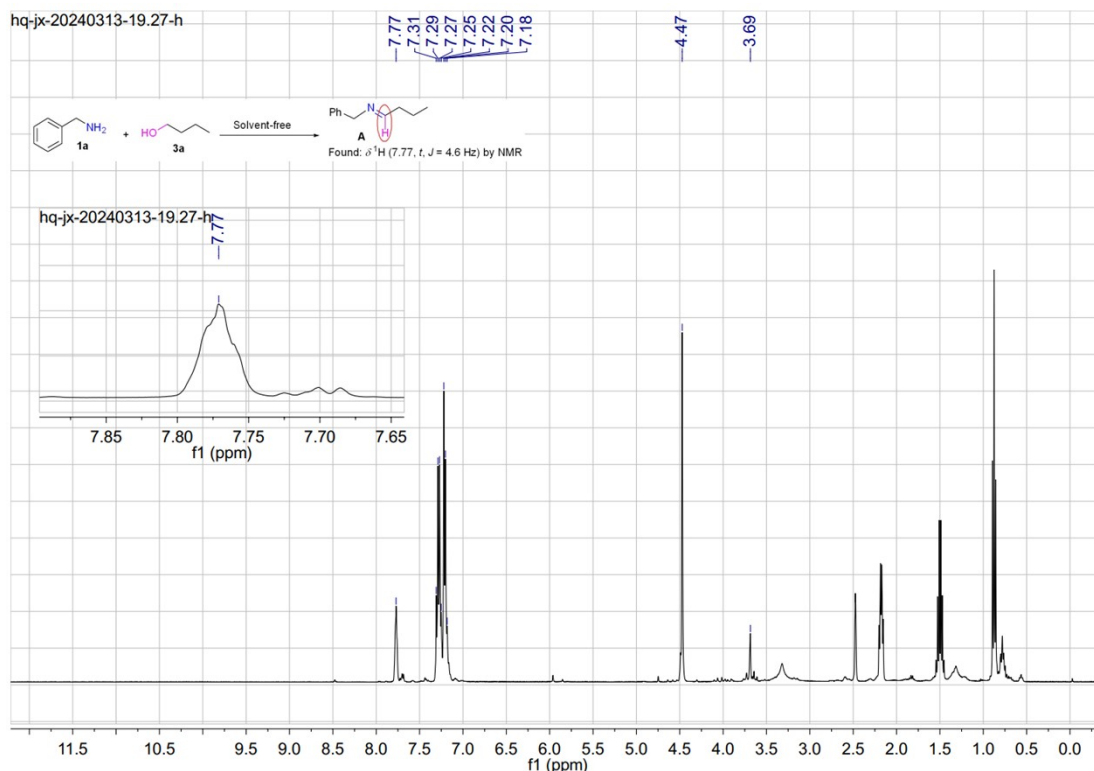

Figure S1e the mixture of reaction between benzylamine and *n*-butyl alcohol in absence of TEMPO and  $\text{PhI}(\text{OAc})_2$  under a solvent-free condition.

**(c) the reaction of *n*-butyl alcohol and H-phosphine oxide**

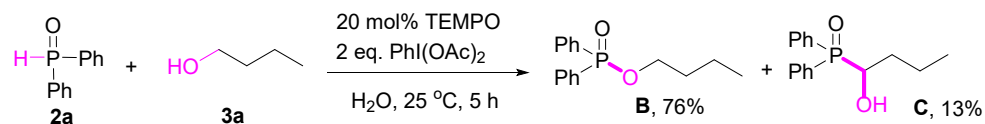

*n*-Butyl alcohols (**3a**, 0.5 mL), H-phosphine oxides (**2a**, 2.5 mmol),  $\text{PhI}(\text{OAc})_2$  (2 mmol, 2 equiv), and  $\text{H}_2\text{O}$  (4 mL) were dissolved in sealed tube with TEMPO (0.2 mmol) and stirring at 25 °C for 5 h. After completion of reaction, the mixture was quenched with sodium bicarbonate (20 mL), extracted with ethyl acetate ( $3 \times 10$  mL). The combined organic layers were washed with saturated brine twice, and dried over anhydrous  $\text{MgSO}_4$ . After filtration, the solvent was evaporated in vacuum. The crude product was purified by silica gel chromatography (PE : EA = 2:1) to give the desired compounds **B** and **C**. **Butyl diphenylphosphinate (B)**:  $^1\text{H}$  NMR (400 MHz,  $\text{CDCl}_3$ )  $\delta$  7.80 (dd,  $J = 12.0, 7.7$  Hz, 4H), 7.56 – 7.37 (m, 6H), 4.02 (q,  $J = 6.6$  Hz, 2H), 1.74 – 1.65 (m, 2H), 1.48 – 1.37 (m, 2H), 0.90 (t,  $J = 7.4$  Hz, 3H).  $^{13}\text{C}$  NMR (101 MHz,  $\text{CDCl}_3$ )

$\delta$  132.23, 132.08 (d,  $J = 2.8$  Hz), 131.66, 131.56, 130.87, 128.56, 128.43, 64.72 (d,  $J = 6.1$  Hz), 32.56 (d,  $J = 6.7$  Hz), 18.87, 13.66.  $^{31}\text{P}$  NMR (162 MHz,  $\text{CDCl}_3$ )  $\delta$  31.08. HRMS:  $[\text{M}+\text{Na}]^+$   $m/z$  calcd for  $\text{C}_{16}\text{H}_{19}\text{O}_2\text{PNa}$ : 297.1015; found: 297.1011. **(1-hydroxybutyl)diphenylphosphine oxide (C)**:  $^1\text{H}$  NMR (400 MHz,  $\text{CDCl}_3$ )  $\delta$  7.87 (dd,  $J = 9.6, 8.2$  Hz, 2H), 7.78 (dd,  $J = 9.7, 8.2$  Hz, 2H), 7.57 – 7.41 (m, 6H), 4.40 (d,  $J = 9.6$  Hz, 1H), 3.56 (s, 1H), 1.75 – 1.53 (m, 3H), 1.45 – 1.31 (m, 1H), 0.85 (t,  $J = 6.8$  Hz, 3H).  $^{13}\text{C}$  NMR (101 MHz,  $\text{CDCl}_3$ )  $\delta$  132.00, 131.97, 131.95, 131.87, 131.49, 131.46, 131.40, 130.58 (d,  $J = 11.0$  Hz), 129.68 (d,  $J = 4.0$  Hz), 128.67, 128.55, 128.44, 70.33 (d,  $J = 83.3$  Hz), 32.44 (d,  $J = 2.8$  Hz), 19.21 (d,  $J = 12.3$  Hz), 13.66.  $^{31}\text{P}$  NMR (162 MHz,  $\text{CDCl}_3$ )  $\delta$  31.86. HRMS:  $[\text{M}+\text{Na}]^+$   $m/z$  calcd for  $\text{C}_{16}\text{H}_{19}\text{O}_2\text{PNa}$ : 297.1015; found: 297.1009.

**(d) the three-component reaction was conducted in a stepwise manner**

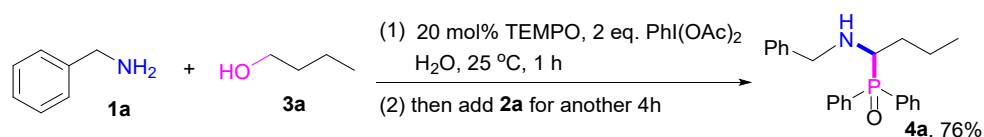

n-Butyl alcohols (**3a**, 0.5 mL), benzylamine (**1a**, 1 mmol),  $\text{PhI}(\text{OAc})_2$  (2 mmol, 2 equiv), TEMPO (0.2 mmol) and  $\text{H}_2\text{O}$  (4 mL) were dissolved in sealed tube and stirring at  $25\text{ }^\circ\text{C}$  for 1 h. Then, the mixture was added **2a** (2.5 mmol) for another 4 h. After completion of reaction, the mixture was quenched with sodium bicarbonate (20 mL), extracted with ethyl acetate ( $3 \times 10$  mL). The combined organic layers were washed with saturated brine twice, and dried over anhydrous  $\text{MgSO}_4$ . After filtration, the solvent was evaporated in vacuum. The crude product was purified by silica gel chromatography (DCM : methanol = 50:1) to give the desired compound **4a**.

**(e) the reaction between 1a and compound C**

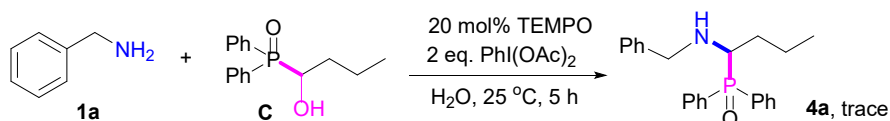

(1-hydroxybutyl)diphenylphosphine oxide (**C**, 0.1 mmol), benzylamine (**1a**, 0.12 mmol),  $\text{PhI}(\text{OAc})_2$  (0.2 mmol, 2 equiv), TEMPO (0.02 mmol) and  $\text{H}_2\text{O}$  (0.4 mL) were dissolved in sealed tube and stirring at  $25\text{ }^\circ\text{C}$  for 5 h. After completion of reaction, the

mixture was quenched with sodium bicarbonate (1 mL), extracted with ethyl acetate (3×3 mL). The combined organic layer was detected by TLC, and only a trace of **4a** was observed.



### 3. Characterization data of compounds 4, 5, 6

#### (1-(benzylamino)butyl)diphenylphosphine oxide (4a)

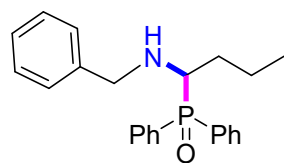

$^1\text{H}$  NMR (400 MHz,  $\text{CDCl}_3$ )  $\delta$  8.05 – 7.95 (m, 2H), 7.92 – 7.84 (m, 2H), 7.60 – 7.45 (m, 6H), 7.33 – 7.26 (m, 3H), 7.16 – 7.09 (m, 2H), 3.65 (dd,  $J = 50.5, 12.8$  Hz, 2H), 3.49 – 3.42 (m, 1H), 1.91 – 1.75 (m, 2H), 1.64 – 1.51 (m, 2H), 1.44 – 1.34 (m, 1H), 0.87 (t,  $J = 7.2$  Hz, 3H).  $^{13}\text{C}$  NMR (101 MHz,  $\text{CDCl}_3$ )  $\delta$  139.73, 133.23, 132.32, 131.85, 131.76, 131.63, 131.61, 131.58, 131.40, 131.35, 131.26, 128.57, 128.45 (d,  $J = 2.4$  Hz), 128.30 (d,  $J = 1.0$  Hz), 56.76 (d,  $J = 82.0$  Hz), 52.92 (d,  $J = 7.2$  Hz), 31.71 (d,  $J = 3.6$  Hz), 19.85 (d,  $J = 10.1$  Hz), 14.00.  $^{31}\text{P}$  NMR (162 MHz,  $\text{CDCl}_3$ )  $\delta$  31.06. HRMS:  $[\text{M}+\text{H}]^+$   $m/z$  calcd for  $\text{C}_{23}\text{H}_{27}\text{NOP}$ : 364.1825; found: 364.1823.

#### (1-((4-methylbenzyl)amino)butyl)diphenylphosphine oxide (4b)

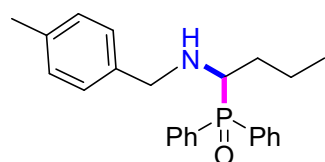

$^1\text{H}$  NMR (400 MHz,  $\text{CDCl}_3$ )  $\delta$  8.02 – 7.94 (m, 2H), 7.93 – 7.85 (m, 2H), 7.57 – 7.44 (m, 6H), 7.09 (d,  $J = 7.8$  Hz, 2H), 7.01 (d,  $J = 8.0$  Hz, 2H), 3.60 (dd,  $J = 54.6, 12.6$  Hz, 2H), 3.44 (ddd,  $J = 8.6, 6.2, 3.9$  Hz, 1H), 2.34 (s, 3H), 1.91 – 1.78 (m, 2H), 1.65 – 1.50 (m, 2H), 1.44 – 1.33 (m, 1H), 0.87 (t,  $J = 7.2$  Hz, 3H).  $^{13}\text{C}$  NMR (101 MHz,  $\text{CDCl}_3$ )  $\delta$  136.70 (d,  $J = 4.3$  Hz), 133.27, 132.36, 132.28, 131.89, 131.81, 131.60 (t,  $J = 2.5$  Hz), 131.38, 131.36 – 131.34 (m), 131.29, 128.98, 128.56, 128.44 (d,  $J = 3.0$  Hz), 128.31, 128.26, 56.79 (d,  $J = 82.4$  Hz), 52.71 (d,  $J = 7.3$  Hz), 31.74 (d,  $J = 3.5$  Hz), 21.10, 19.87 (d,  $J = 10.2$  Hz), 14.02.  $^{31}\text{P}$  NMR (162 MHz,  $\text{CDCl}_3$ )  $\delta$  31.04. HRMS:  $[\text{M}+\text{H}]^+$   $m/z$  calcd for  $\text{C}_{24}\text{H}_{29}\text{NOP}$ : 378.1981; found: 378.1982.

#### (1-((4-methoxybenzyl)amino)butyl)diphenylphosphine oxide (4c)

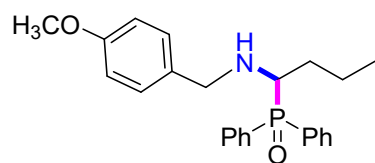

$^1\text{H}$  NMR (400 MHz,  $\text{CDCl}_3$ )  $\delta$  8.01 – 7.92 (m, 2H), 7.90 – 7.83 (m, 2H), 7.52 – 7.43 (m, 6H), 7.02 (d,  $J = 8.6$  Hz, 2H), 6.83 – 6.77 (m, 2H), 3.78 (s, 3H), 3.57 (dd,  $J = 52.1, 12.6$  Hz, 2H), 3.43 (ddd,  $J = 8.6, 6.0, 4.0$  Hz, 1H), 1.90 – 1.75 (m, 1H), 1.56 (tdt,  $J = 9.6, 8.0, 4.8$  Hz, 2H), 1.45 – 1.31 (m, 1H), 0.85 (t,  $J = 7.2$  Hz, 3H).  $^{13}\text{C}$  NMR (101 MHz,  $\text{CDCl}_3$ )  $\delta$  158.73, 133.15, 132.61 (d,  $J = 2.9$  Hz), 132.24,

131.83, 131.81, 131.74, 131.66 – 131.58 (m), 131.32, 131.24, 130.77, 130.65, 129.49, 128.99, 128.86, 128.57, 128.44 (d,  $J = 3.0$  Hz), 128.32, 113.67, 56.52 (d,  $J = 82.3$  Hz), 55.26, 52.30 (d,  $J = 7.3$  Hz), 31.71 (d,  $J = 3.5$  Hz), 19.85 (d,  $J = 10.1$  Hz), 14.02.  $^{31}\text{P}$  NMR (162 MHz,  $\text{CDCl}_3$ )  $\delta$  31.27. HRMS:  $[\text{M}+\text{H}]^+$   $m/z$  calcd for  $\text{C}_{24}\text{H}_{29}\text{NO}_2\text{P}$ : 394.1930; found: 394.1933.

#### **(1-((4-fluorobenzyl)amino)butyl)diphenylphosphine oxide (4d)**

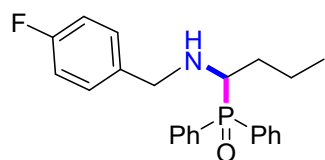

$^1\text{H}$  NMR (400 MHz,  $\text{CDCl}_3$ )  $\delta$  7.98 – 7.90 (m, 2H), 7.89 – 7.82 (m, 2H), 7.59 – 7.44 (m, 6H), 7.09 – 7.01 (m, 2H), 6.97 – 6.90 (m, 2H), 3.63 (dd,  $J = 55.8, 12.9$  Hz, 2H), 3.46 – 3.39 (m, 1H), 1.94 – 1.72 (m, 2H), 1.66 – 1.51 (m, 2H), 1.45 – 1.31 (m, 1H), 0.86 (t,  $J = 7.2$  Hz, 3H).  $^{13}\text{C}$  NMR (101 MHz,  $\text{CDCl}_3$ )  $\delta$  161.95 (d,  $J = 244.9$  Hz), 135.46 (d,  $J = 3.1$  Hz), 133.07, 132.45, 132.16, 131.71, 131.66, 131.63, 131.53, 131.27, 131.18, 129.85, 129.77, 128.60, 128.48 (d,  $J = 1.4$  Hz), 128.37, 115.14, 114.93, 56.88, 56.07, 51.99 (d,  $J = 7.2$  Hz), 31.66 (d,  $J = 3.7$  Hz), 19.85 (d,  $J = 10.1$  Hz), 13.98.  $^{19}\text{F}$  NMR (376 MHz,  $\text{CDCl}_3$ )  $\delta$  -115.72.  $^{31}\text{P}$  NMR (162 MHz,  $\text{CDCl}_3$ )  $\delta$  31.21. HRMS:  $[\text{M}+\text{H}]^+$   $m/z$  calcd for  $\text{C}_{23}\text{H}_{26}\text{FNOP}$ : 382.1731; found: 382.1729.

#### **Diphenyl(1-((4-(trifluoromethyl)benzyl)amino)butyl)phosphine oxide (4e)**

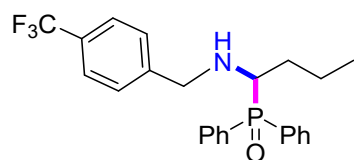

$^1\text{H}$  NMR (400 MHz,  $\text{CDCl}_3$ )  $\delta$  7.96 – 7.88 (m, 2H), 7.88 – 7.80 (m, 2H), 7.57 – 7.45 (m, 8H), 7.20 (d,  $J = 8.0$  Hz, 2H), 3.74 (dd,  $J = 62.9, 13.5$  Hz, 2H), 3.43 (ddd,  $J = 9.0, 5.3, 4.1$  Hz, 1H), 1.93 (s, 1H), 1.85 – 1.73 (m, 1H), 1.67 – 1.53 (m, 2H), 1.39 (ddd,  $J = 13.9, 8.9, 4.1$  Hz, 1H), 0.87 (t,  $J = 7.2$  Hz, 3H).  $^{13}\text{C}$  NMR (101 MHz,  $\text{CDCl}_3$ )  $\delta$  143.90, 132.85, 132.44, 131.94, 131.75 (d,  $J = 1.9$  Hz), 131.60, 131.52, 131.21, 131.12, 128.67, 128.56, 128.45, 128.42, 125.17 (q,  $J = 3.8$  Hz), 56.56 (d,  $J = 80.4$  Hz), 52.09 (d,  $J = 7.2$  Hz), 31.62 (d,  $J = 3.8$  Hz), 19.86 (d,  $J = 10.0$  Hz), 13.97.  $^{19}\text{F}$  NMR (376 MHz,  $\text{CDCl}_3$ )  $\delta$  -62.42.  $^{31}\text{P}$  NMR (162 MHz,  $\text{CDCl}_3$ )  $\delta$  31.39. HRMS:  $[\text{M}+\text{H}]^+$   $m/z$  calcd for  $\text{C}_{24}\text{H}_{26}\text{F}_3\text{NOP}$ : 432.1699; found: 432.1701.

#### **4-(((1-(diphenylphosphoryl)butyl)amino)methyl)benzonitrile (4f)**

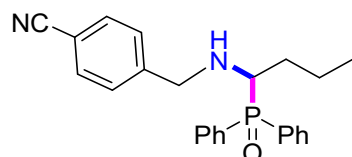

$^1\text{H}$  NMR (400 MHz,  $\text{CDCl}_3$ )  $\delta$  7.94 – 7.86 (m, 2H), 7.86 – 7.79 (m, 2H), 7.56 – 7.43 (m, 8H), 7.18 (d,  $J = 8.3$  Hz, 2H), 3.74 (dd,  $J = 62.3, 14.0$  Hz, 2H), 3.42 (dt,  $J = 8.8, 4.3$  Hz, 1H), 2.22 – 1.90 (m, 1H), 1.82 – 1.67 (m, 1H), 1.67 – 1.52 (m, 2H), 1.43 – 1.29 (m, 1H), 0.84 (t,  $J = 7.2$  Hz, 3H).  $^{13}\text{C}$  NMR (101 MHz,  $\text{CDCl}_3$ )  $\delta$  145.50, 132.64, 132.53, 132.03, 131.77 (t,  $J = 3.0$  Hz), 131.60, 131.47, 131.39, 131.14, 131.05, 128.71, 128.59 (d,  $J = 1.3$  Hz), 128.49, 118.89, 110.77, 56.58 (d,  $J = 79.4$  Hz), 52.01 (d,  $J = 6.8$  Hz), 31.55 (d,  $J = 3.9$  Hz), 19.83 (d,  $J = 10.1$  Hz), 13.94.  $^{31}\text{P}$  NMR (162 MHz,  $\text{CDCl}_3$ )  $\delta$  31.51. HRMS:  $[\text{M}+\text{H}]^+$   $m/z$  calcd for  $\text{C}_{24}\text{H}_{26}\text{N}_2\text{OP}$ : 389.1777; found: 389.1780.

**(1-((3-methylbenzyl)amino)butyl)diphenylphosphine oxide (4g)**

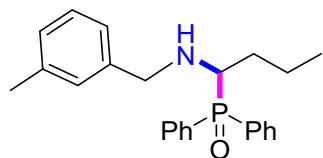

$^1\text{H}$  NMR (400 MHz,  $\text{CDCl}_3$ )  $\delta$  8.02 – 7.93 (m, 2H), 7.93 – 7.84 (m, 2H), 7.58 – 7.45 (m, 6H), 7.17 (t,  $J = 7.9$  Hz, 1H), 7.06 (d,  $J = 7.6$  Hz, 1H), 6.92 (d,  $J = 6.6$  Hz, 2H), 3.63 (dd,  $J = 54.3, 12.7$  Hz, 2H), 3.46 (ddd,  $J = 8.5, 6.1, 4.0$  Hz, 1H), 2.32 (s, 3H), 2.00 (s, 1H), 1.90 – 1.77 (m, 1H), 1.66 – 1.50 (m, 2H), 1.47 – 1.34 (m, 1H), 0.87 (t,  $J = 7.2$  Hz, 3H).  $^{13}\text{C}$  NMR (101 MHz,  $\text{CDCl}_3$ )  $\delta$  139.64, 137.89, 133.22, 132.30, 131.87, 131.78, 131.67 – 131.57 (m), 131.37, 131.28, 129.12, 128.58, 128.47, 128.44, 128.33, 128.19, 127.84, 125.33, 56.71 (d,  $J = 82.0$  Hz), 52.88 (d,  $J = 7.5$  Hz), 31.68 (d,  $J = 3.5$  Hz), 21.37, 19.84 (d,  $J = 10.1$  Hz), 14.02.  $^{31}\text{P}$  NMR (162 MHz,  $\text{CDCl}_3$ )  $\delta$  31.24. HRMS:  $[\text{M}+\text{H}]^+$   $m/z$  calcd for  $\text{C}_{24}\text{H}_{29}\text{NOP}$ : 378.1981; found: 378.1983.

**(1-((3-methoxybenzyl)amino)butyl)diphenylphosphine oxide (4h)**

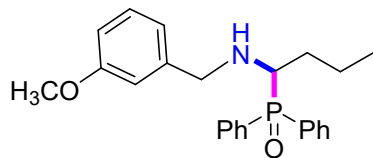

$^1\text{H}$  NMR (400 MHz,  $\text{CDCl}_3$ )  $\delta$  8.01 – 7.92 (m, 2H), 7.91 – 7.84 (m, 2H), 7.58 – 7.44 (m, 6H), 7.18 (t,  $J = 7.8$  Hz, 1H), 6.82 – 6.76 (m, 1H), 6.70 (t,  $J = 5.3$  Hz, 2H), 3.75 (s, 3H), 3.63 (dd,  $J = 50.8, 12.9$  Hz, 2H), 3.46 (ddd,  $J = 8.6, 5.9, 4.0$  Hz, 1H), 1.82 (dddd,  $J = 12.0, 10.0, 7.3, 3.9$  Hz, 1H), 1.58 (qdd,  $J = 13.9, 8.1, 4.4$  Hz, 2H), 1.46 – 1.34 (m, 1H), 0.86 (t,  $J = 7.2$  Hz, 3H).  $^{13}\text{C}$  NMR (101 MHz,  $\text{CDCl}_3$ )

$\delta$  159.63, 141.38, 133.22, 132.33 (d,  $J = 3.1$  Hz), 131.82, 131.73, 131.63 (t,  $J = 2.3$  Hz), 131.43, 131.32, 131.24, 129.26, 128.59, 128.47 (d,  $J = 2.4$  Hz), 128.34, 120.59, 113.71, 112.75, 56.61 (d,  $J = 81.9$  Hz), 55.15, 52.80 (d,  $J = 7.3$  Hz), 31.68 (d,  $J = 3.6$  Hz), 19.86 (d,  $J = 10.1$  Hz), 14.03.  $^{31}\text{P}$  NMR (162 MHz,  $\text{CDCl}_3$ )  $\delta$  31.13. HRMS:  $[\text{M}+\text{H}]^+$   $m/z$  calcd for  $\text{C}_{24}\text{H}_{29}\text{NO}_2\text{P}$ : 394.1930; found: 394.1932.

**Diphenyl(1-((3-(trifluoromethyl)benzyl)amino)butyl)phosphine oxide (4i)**

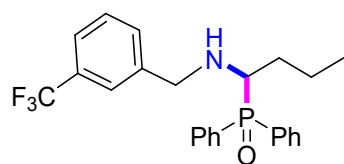

$^1\text{H}$  NMR (400 MHz,  $\text{CDCl}_3$ )  $\delta$  7.97 – 7.88 (m, 2H), 7.87 – 7.79 (m, 2H), 7.54 – 7.40 (m, 7H), 7.33 (d,  $J = 10.7$  Hz, 2H), 7.27 (t,  $J = 7.4$  Hz, 1H), 3.71 (dd,  $J = 62.1, 13.4$  Hz, 2H), 3.44 (dt,  $J = 8.7, 4.4$  Hz, 1H), 2.43 (s, 1H), 1.83 – 1.68 (m, 1H), 1.66 – 1.52 (m, 2H), 1.45 – 1.29 (m, 1H), 0.83 (t,  $J = 7.1$  Hz, 3H).  $^{13}\text{C}$  NMR (101 MHz,  $\text{CDCl}_3$ )  $\delta$  140.79, 132.74, 132.32, 131.84, 131.80 – 131.70 (m), 131.53, 131.44, 131.42 – 131.37 (m), 131.15, 131.06, 130.66, 130.34, 128.66, 128.55, 128.45, 125.49, 124.95 (q,  $J = 3.6$  Hz), 123.88 (d,  $J = 3.7$  Hz), 122.79, 56.43 (d,  $J = 80.1$  Hz), 52.07 (d,  $J = 6.8$  Hz), 31.55 (d,  $J = 3.7$  Hz), 19.78 (d,  $J = 10.1$  Hz), 13.90.  $^{19}\text{F}$  NMR (376 MHz,  $\text{CDCl}_3$ )  $\delta$  -62.51.  $^{31}\text{P}$  NMR (162 MHz,  $\text{CDCl}_3$ )  $\delta$  31.67. HRMS:  $[\text{M}+\text{H}]^+$   $m/z$  calcd for  $\text{C}_{24}\text{H}_{26}\text{F}_3\text{NOP}$ : 432.1699; found: 432.1698.

**(1-((2-methylbenzyl)amino)butyl)diphenylphosphine oxide (4j)**

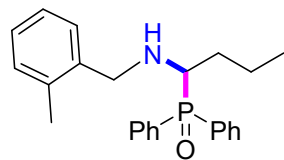

$^1\text{H}$  NMR (400 MHz,  $\text{CDCl}_3$ )  $\delta$  7.99 – 7.91 (m, 2H), 7.88 – 7.81 (m, 2H), 7.58 – 7.44 (m, 6H), 7.20 – 7.07 (m, 4H), 3.65 (dd,  $J = 63.2, 12.5$  Hz, 2H), 3.51 (ddd,  $J = 8.5, 6.2, 4.1$  Hz, 1H), 2.10 (s, 3H), 1.93 – 1.78 (m, 2H), 1.60 (dddd,  $J = 9.8, 7.2, 6.1, 3.8$  Hz, 2H), 1.47 – 1.39 (m, 1H), 0.89 (t,  $J = 7.2$  Hz, 3H).  $^{13}\text{C}$  NMR (101 MHz,  $\text{CDCl}_3$ )  $\delta$  137.59, 136.80, 133.31, 132.40, 132.26, 131.81, 131.72, 131.66 – 131.56 (m), 131.34, 131.28, 131.20, 130.30, 128.95, 128.59, 128.47 (d,  $J = 3.0$  Hz), 128.34, 127.26, 125.78, 56.85 (d,  $J = 81.9$  Hz), 50.82 (d,  $J = 7.6$  Hz), 31.66 (d,  $J = 3.7$  Hz), 19.90 (d,  $J = 9.9$  Hz), 18.73, 14.04.  $^{31}\text{P}$  NMR (162 MHz,  $\text{CDCl}_3$ )  $\delta$  31.48. HRMS:  $[\text{M}+\text{H}]^+$   $m/z$  calcd for  $\text{C}_{24}\text{H}_{29}\text{NOP}$ : 378.1981; found: 378.1985.

**(1-((2-methoxybenzyl)amino)butyl)diphenylphosphine oxide (4k)**

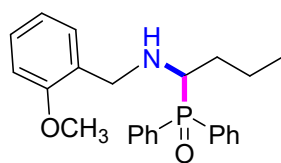

$^1\text{H}$  NMR (400 MHz,  $\text{CDCl}_3$ )  $\delta$  8.10 – 8.01 (m, 2H), 7.96 – 7.88 (m, 2H), 7.57 – 7.43 (m, 6H), 7.28 – 7.20 (m, 1H), 6.99 (dd,  $J = 7.3, 1.5$  Hz, 1H), 6.91 – 6.80 (m, 2H), 3.76 (s, 3H), 3.54 (q,  $J = 13.0$  Hz, 2H), 3.40 (ddd,  $J = 9.8, 6.2, 3.9$  Hz, 1H), 1.96 – 1.78 (m, 2H), 1.56 – 1.43 (m, 2H), 1.35 – 1.21 (m, 1H), 0.81 (t,  $J = 7.2$  Hz, 3H).  $^{13}\text{C}$  NMR (101 MHz,  $\text{CDCl}_3$ )  $\delta$  157.61, 133.46, 132.55, 131.92, 131.63, 131.54, 131.50 (d,  $J = 2.5$  Hz), 130.99, 130.11, 128.46, 128.34, 128.26, 128.15, 127.78, 120.34, 110.19, 57.47 (d,  $J = 86.6$  Hz), 55.06, 48.81 (d,  $J = 7.3$  Hz), 31.77 (d,  $J = 2.4$  Hz), 19.51 (d,  $J = 10.6$  Hz), 13.95.  $^{31}\text{P}$  NMR (162 MHz,  $\text{CDCl}_3$ )  $\delta$  30.25. HRMS:  $[\text{M}+\text{H}]^+$   $m/z$  calcd for  $\text{C}_{24}\text{H}_{29}\text{NO}_2\text{P}$ : 394.1930; found: 394.1935.

#### Diphenyl(1-(2-(trifluoromethyl)benzyl)amino)butylphosphine oxide (4l)

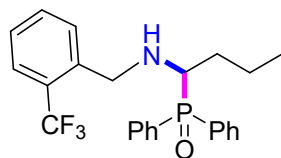

$^1\text{H}$  NMR (400 MHz,  $\text{CDCl}_3$ )  $\delta$  8.01 – 7.92 (m, 2H), 7.90 – 7.82 (m, 2H), 7.57 – 7.44 (m, 7H), 7.39 (t,  $J = 7.4$  Hz, 1H), 7.29 (t,  $J = 7.2$  Hz, 2H), 3.79 (dd,  $J = 83.4, 14.0$  Hz, 2H), 3.50 (ddd,  $J = 9.1, 5.5, 4.0$  Hz, 1H), 2.39 (s, 1H), 1.88 – 1.75 (m, 1H), 1.66 – 1.48 (m, 2H), 1.46 – 1.29 (m, 1H), 0.84 (t,  $J = 7.2$  Hz, 3H).  $^{13}\text{C}$  NMR (101 MHz,  $\text{CDCl}_3$ )  $\delta$  138.45, 132.87, 132.03, 131.96, 131.82, 131.75, 131.73, 131.67, 131.27, 131.18, 131.10, 130.58, 128.66, 128.55, 128.50, 128.39, 128.09, 127.79, 126.96, 125.62 (dd,  $J = 11.9, 6.1$  Hz), 122.99, 57.57 (d,  $J = 82.5$  Hz), 49.06 (d,  $J = 7.5$  Hz), 31.74 (d,  $J = 3.5$  Hz), 19.66 (d,  $J = 10.1$  Hz), 13.93.  $^{19}\text{F}$  NMR (376 MHz,  $\text{CDCl}_3$ )  $\delta$  -59.42.  $^{31}\text{P}$  NMR (162 MHz,  $\text{CDCl}_3$ )  $\delta$  31.55. HRMS:  $[\text{M}+\text{H}]^+$   $m/z$  calcd for  $\text{C}_{24}\text{H}_{26}\text{F}_3\text{NOP}$ : 432.1699; found: 432.1698.

#### (1-((furan-2-ylmethyl)amino)butyl)diphenylphosphine oxide (4m)

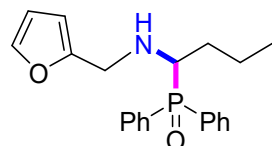

$^1\text{H}$  NMR (400 MHz,  $\text{CDCl}_3$ )  $\delta$  8.04 – 7.95 (m, 2H), 7.94 – 7.84 (m, 2H), 7.56 – 7.44 (m, 6H), 7.34 (d,  $J = 1.1$  Hz, 1H), 6.29 (dd,  $J = 3.0, 1.9$  Hz, 1H), 6.05 (d,  $J = 3.0$  Hz, 1H), 3.55 (dd,  $J = 49.8, 14.5$  Hz, 2H), 3.46 – 3.37 (m, 1H), 2.01 – 1.75 (m, 2H), 1.55 – 1.39 (m, 2H), 1.27 (dd,  $J = 16.1, 6.5$  Hz, 1H), 0.81 (t,  $J = 7.2$  Hz, 3H).  $^{13}\text{C}$  NMR (101 MHz,  $\text{CDCl}_3$ )  $\delta$  153.15, 141.91, 133.02, 132.10, 131.94, 131.86, 131.76 – 131.59 (m), 131.46, 131.38, 130.99, 128.56, 128.43 (d,  $J = 3.5$  Hz), 128.31,

110.13, 107.54, 56.28 (d,  $J = 84.4$  Hz), 45.12 (d,  $J = 7.0$  Hz), 31.78 (d,  $J = 2.8$  Hz), 19.60 (d,  $J = 10.4$  Hz), 13.92.  $^{31}\text{P}$  NMR (162 MHz,  $\text{CDCl}_3$ )  $\delta$  30.41. HRMS:  $[\text{M}+\text{H}]^+$   $m/z$  calcd for  $\text{C}_{21}\text{H}_{25}\text{NO}_2\text{P}$ : 354.1617; found: 354.1620.

#### Diphenyl(1-((thiophen-2-ylmethyl)amino)butyl)phosphine oxide (4n)

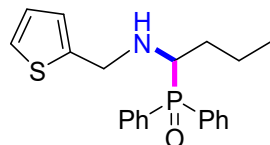

$^1\text{H}$  NMR (400 MHz,  $\text{CDCl}_3$ )  $\delta$  8.05 – 7.97 (m, 2H), 7.95 – 7.88 (m, 2H), 7.57 – 7.45 (m, 6H), 7.21 (dd,  $J = 5.1, 1.1$  Hz, 1H), 6.92 (dd,  $J = 5.1, 3.5$  Hz, 1H), 6.79 – 6.75 (m, 1H), 3.84 (dd,  $J = 69.2, 13.7$  Hz, 2H), 3.50 (ddd,  $J = 9.5, 6.0, 3.8$  Hz, 1H), 1.92 – 1.77 (m, 2H), 1.66 – 1.47 (m, 2H), 1.44 – 1.34 (m, 1H), 0.87 (t,  $J = 7.2$  Hz, 3H).  $^{13}\text{C}$  NMR (101 MHz,  $\text{CDCl}_3$ )  $\delta$  143.47, 133.06, 132.13 (d,  $J = 2.9$  Hz), 131.90, 131.82, 131.68 (dd,  $J = 4.6, 2.8$  Hz), 131.37, 131.29, 131.19, 128.61, 128.49 (d,  $J = 2.6$  Hz), 128.37, 126.46, 125.03, 124.70, 56.65 (d,  $J = 81.9$  Hz), 47.52 (d,  $J = 7.2$  Hz), 31.75 (d,  $J = 3.4$  Hz), 19.85 (d,  $J = 10.2$  Hz), 13.99.  $^{31}\text{P}$  NMR (162 MHz,  $\text{CDCl}_3$ )  $\delta$  30.47. HRMS:  $[\text{M}+\text{H}]^+$   $m/z$  calcd for  $\text{C}_{21}\text{H}_{25}\text{NOPS}$ : 370.1389; found: 370.1392.

#### (1-(benzhydrylamino)butyl)diphenylphosphine oxide (4o)

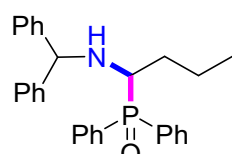

$^1\text{H}$  NMR (400 MHz,  $\text{CDCl}_3$ )  $\delta$  7.95 – 7.87 (m, 2H), 7.80 – 7.73 (m, 2H), 7.64 – 7.41 (m, 7H), 7.30 – 7.21 (m, 6H), 7.21 – 7.16 (m, 3H), 7.09 (dd,  $J = 6.7, 2.9$  Hz, 2H), 4.73 (s, 1H), 3.43 (dt,  $J = 9.5, 4.7$  Hz, 1H), 1.89 (s, 2H), 1.84 – 1.69 (m, 1H), 1.65 – 1.52 (m, 2H), 1.37 – 1.29 (m, 1H), 0.78 (t,  $J = 7.2$  Hz, 3H).  $^{13}\text{C}$  NMR (101 MHz,  $\text{CDCl}_3$ )  $\delta$  143.25, 143.00, 133.28, 132.91, 132.36, 132.01, 131.61, 131.52, 131.16, 131.07, 128.72, 128.60, 128.50, 128.43, 128.39, 128.35, 127.51, 127.41, 127.24, 127.11, 64.65 (d,  $J = 7.6$  Hz), 53.59 (d,  $J = 78.0$  Hz), 31.87 (d,  $J = 3.8$  Hz), 19.45 (d,  $J = 7.8$  Hz), 14.16.  $^{31}\text{P}$  NMR (162 MHz,  $\text{CDCl}_3$ )  $\delta$  31.71. HRMS:  $[\text{M}+\text{H}]^+$   $m/z$  calcd for  $\text{C}_{29}\text{H}_{31}\text{NOP}$ : 440.2138; found: 440.2142.

#### Diphenyl(1-(phenylamino)butyl)phosphine oxide (5a)

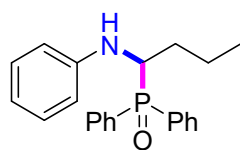

$^1\text{H}$  NMR (400 MHz,  $\text{CDCl}_3$ )  $\delta$  7.94 – 7.86 (m, 2H), 7.80 (ddd,  $J = 10.9, 8.2, 1.2$  Hz, 2H), 7.59 – 7.47 (m, 3H), 7.47 – 7.41 (m, 1H), 7.41 – 7.33 (m, 2H), 7.09 (t,  $J = 7.9$  Hz, 2H), 6.67 (t,  $J = 7.3$  Hz, 1H), 6.55 (d,  $J = 7.8$  Hz, 2H), 4.33 (ddd,  $J =$

= 13.5, 10.6, 3.7 Hz, 1H), 4.03 (s, 1H), 1.97 – 1.81 (m, 1H), 1.75 – 1.48 (m, 2H), 1.38 – 1.29 (m, 1H), 0.83 (t,  $J = 7.3$  Hz, 3H).  $^{13}\text{C}$  NMR (101 MHz,  $\text{CDCl}_3$ )  $\delta$  147.24 (d,  $J = 6.7$  Hz), 131.99 (d,  $J = 2.7$  Hz), 131.81 (d,  $J = 2.7$  Hz), 131.48, 131.40, 131.31, 131.22, 129.23, 128.79, 128.68, 128.47, 128.36, 117.91, 113.22, 52.57 (d,  $J = 80.3$  Hz), 32.57 (d,  $J = 4.1$  Hz), 19.65 (d,  $J = 10.1$  Hz), 13.98.  $^{31}\text{P}$  NMR (162 MHz,  $\text{CDCl}_3$ )  $\delta$  31.63. HRMS:  $[\text{M}+\text{H}]^+$   $m/z$  calcd for  $\text{C}_{22}\text{H}_{25}\text{NOP}$ : 350.1668; found: 350.1670.

#### Diphenyl(1-(*p*-tolylamino)butyl)phosphine oxide (5b)

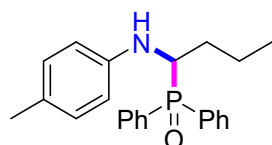

$^1\text{H}$  NMR (400 MHz,  $\text{CDCl}_3$ )  $\delta$  7.94 – 7.86 (m, 2H), 7.85 – 7.77 (m, 2H), 7.57 – 7.44 (m, 4H), 7.42 – 7.35 (m, 2H), 6.91 (d,  $J = 8.2$  Hz, 2H), 6.47 (d,  $J = 8.4$  Hz, 2H), 4.40 – 4.20 (m, 1H), 3.86 (s, 1H), 2.22 (s, 3H), 1.94 – 1.83 (m, 1H), 1.69 – 1.47 (m, 2H), 1.38 – 1.29 (m, 1H), 0.82 (t,  $J = 7.3$  Hz, 3H).  $^{13}\text{C}$  NMR (101 MHz,  $\text{CDCl}_3$ )  $\delta$  144.91 (d,  $J = 7.5$  Hz), 131.94 (d,  $J = 2.7$  Hz), 131.76 (d,  $J = 2.7$  Hz), 131.55, 131.46, 131.35, 131.26, 129.74, 128.76, 128.65, 128.47, 128.36, 127.14, 113.36, 52.92 (d,  $J = 81.3$  Hz), 32.68 (d,  $J = 4.2$  Hz), 20.35, 19.68 (d,  $J = 10.0$  Hz), 13.99.  $^{31}\text{P}$  NMR (162 MHz,  $\text{CDCl}_3$ )  $\delta$  31.63. HRMS:  $[\text{M}+\text{H}]^+$   $m/z$  calcd for  $\text{C}_{23}\text{H}_{27}\text{NOP}$ : 364.1825; found: 364.1830.

#### (1-((4-methoxyphenyl)amino)butyl)diphenylphosphine oxide (5c)

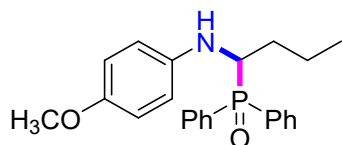

$^1\text{H}$  NMR (400 MHz,  $\text{CDCl}_3$ )  $\delta$  7.93 – 7.85 (m, 2H), 7.83 – 7.77 (m, 2H), 7.56 – 7.42 (m, 4H), 7.40 – 7.33 (m, 2H), 6.71 – 6.65 (m, 2H), 6.53 – 6.46 (m, 2H), 4.21 (s, 1H), 3.85 – 3.75 (m, 1H), 3.72 (s, 3H), 1.94 – 1.79 (m, 1H), 1.69 – 1.48 (m, 2H), 1.37 – 1.29 (m, 1H), 0.82 (t,  $J = 7.3$  Hz, 3H).  $^{13}\text{C}$  NMR (101 MHz,  $\text{CDCl}_3$ )  $\delta$  152.31, 141.44 (d,  $J = 7.2$  Hz), 131.96 (d,  $J = 2.8$  Hz), 131.78 (d,  $J = 2.7$  Hz), 131.53, 131.44, 131.31, 131.22, 128.78, 128.66, 128.45, 128.33, 114.81, 114.69, 55.73, 53.94 (d,  $J = 80.7$  Hz), 32.63 (d,  $J = 4.3$  Hz), 19.69 (d,  $J = 10.2$  Hz), 13.97.  $^{31}\text{P}$  NMR (162 MHz,  $\text{CDCl}_3$ )  $\delta$  31.75. HRMS:  $[\text{M}+\text{H}]^+$   $m/z$  calcd for  $\text{C}_{23}\text{H}_{27}\text{NO}_2\text{P}$ : 380.1774; found: 380.1776.

#### (1-((4-chlorophenyl)amino)butyl)diphenylphosphine oxide (5d)

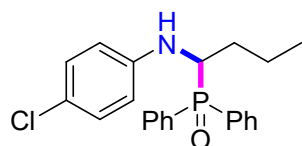

$^1\text{H}$  NMR (400 MHz,  $\text{CDCl}_3$ )  $\delta$  7.91 – 7.84 (m, 2H), 7.80 – 7.73 (m, 2H), 7.58 – 7.47 (m, 3H), 7.46 – 7.39 (m, 1H), 7.38 – 7.31 (m, 2H), 7.03 – 6.96 (m, 2H), 6.50 – 6.42 (m, 2H), 4.38 – 4.19 (m, 2H), 1.88 – 1.76 (m, 1H), 1.74 – 1.61 (m, 1H), 1.60 – 1.46 (m, 1H), 1.37 – 1.29 (m, 1H), 0.81 (t,  $J = 7.3$  Hz, 3H).  $^{13}\text{C}$  NMR (101 MHz,  $\text{CDCl}_3$ )  $\delta$  146.03 (d,  $J = 6.1$  Hz), 132.13 (d,  $J = 2.7$  Hz), 131.92 (d,  $J = 2.7$  Hz), 131.61 (d,  $J = 4.9$  Hz), 131.32, 131.23, 131.22, 131.13, 130.67, 128.98, 128.87, 128.76, 128.53, 128.42, 122.14, 114.17, 52.86 (d,  $J = 79.7$  Hz), 32.36 (d,  $J = 4.2$  Hz), 19.62 (d,  $J = 10.4$  Hz), 13.92.  $^{31}\text{P}$  NMR (162 MHz,  $\text{CDCl}_3$ )  $\delta$  31.90. HRMS:  $[\text{M}+\text{H}]^+$   $m/z$  calcd for  $\text{C}_{22}\text{H}_{24}\text{ClNOP}$ : 384.1279; found: 384.1283.

#### Diphenyl(1-((4-(trifluoromethyl)phenyl)amino)butyl)phosphine oxide (5e)

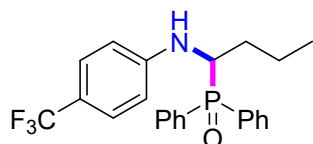

$^1\text{H}$  NMR (400 MHz,  $\text{CDCl}_3$ )  $\delta$  7.92 – 7.85 (m, 2H), 7.79 – 7.72 (m, 2H), 7.61 – 7.51 (m, 3H), 7.45 – 7.39 (m, 1H), 7.38 – 7.26 (m, 4H), 6.56 (d,  $J = 8.6$  Hz, 2H), 4.78 (d,  $J = 8.2$  Hz, 1H), 4.34 (tdd,  $J = 9.8, 5.6, 3.9$  Hz, 1H), 1.87 – 1.67 (m, 2H), 1.64 – 1.48 (m, 1H), 1.39 – 1.31 (m, 1H), 0.84 (t,  $J = 7.3$  Hz, 3H).  $^{13}\text{C}$  NMR (101 MHz,  $\text{CDCl}_3$ )  $\delta$  150.05 (d,  $J = 5.5$  Hz), 132.25 (d,  $J = 2.7$  Hz), 132.04 (d,  $J = 2.7$  Hz), 131.23 (d,  $J = 2.5$  Hz), 131.14 (d,  $J = 2.3$  Hz), 128.96, 128.84, 128.59, 128.48, 126.64 – 126.44 (m), 119.13 (q,  $J = 32.7$  Hz), 112.18, 52.17 (d,  $J = 79.0$  Hz), 32.18 (d,  $J = 3.9$  Hz), 19.58 (d,  $J = 10.4$  Hz), 13.87.  $^{31}\text{P}$  NMR (162 MHz,  $\text{CDCl}_3$ )  $\delta$  31.91. HRMS:  $[\text{M}+\text{H}]^+$   $m/z$  calcd for  $\text{C}_{23}\text{H}_{24}\text{F}_3\text{NOP}$ : 418.1542; found: 418.1544.

#### 4-((1-(diphenylphosphoryl)butyl)amino)benzonitrile (5f)

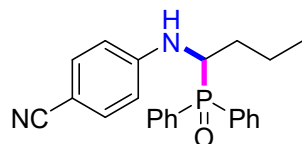

$^1\text{H}$  NMR (400 MHz,  $\text{CDCl}_3$ )  $\delta$  7.92 – 7.84 (m, 2H), 7.76 – 7.68 (m, 2H), 7.62 – 7.52 (m, 3H), 7.46 – 7.40 (m, 1H), 7.36 – 7.26 (m, 4H), 6.53 (d,  $J = 8.8$  Hz, 2H), 5.31 (d,  $J = 8.7$  Hz, 1H), 4.32 (ddd,  $J = 15.1, 10.4, 4.9$  Hz, 1H), 1.77 (dt,  $J = 14.9, 7.3$  Hz, 2H), 1.55 (dt,  $J = 20.9, 7.2$  Hz, 1H), 1.40 – 1.29 (m, 1H), 0.84 (t,  $J = 7.3$  Hz, 3H).  $^{13}\text{C}$  NMR (101 MHz,  $\text{CDCl}_3$ )  $\delta$  150.98 (d,  $J = 4.6$  Hz), 133.56, 132.38 (d,  $J = 2.7$  Hz), 132.13, 131.15, 131.07 (d,  $J = 1.9$  Hz), 129.04, 128.93, 128.62, 128.51, 120.22, 112.43, 99.03, 52.01 (d,  $J = 78.4$  Hz), 31.91 (d,  $J = 3.7$  Hz), 19.55 (d,  $J = 10.6$  Hz),



13.82.  $^{31}\text{P}$  NMR (162 MHz,  $\text{CDCl}_3$ )  $\delta$  31.64. HRMS:  $[\text{M}+\text{H}]^+$   $m/z$  calcd for  $\text{C}_{23}\text{H}_{24}\text{N}_2\text{OP}$ : 375.1621; found: 375.1625.

**Diphenyl(1-(*m*-tolylamino)butyl)phosphine oxide (5g)**

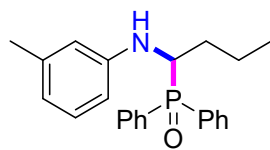

$^1\text{H}$  NMR (400 MHz,  $\text{CDCl}_3$ )  $\delta$  7.95 – 7.87 (m, 2H), 7.85 – 7.77 (m, 2H), 7.57 – 7.47 (m, 3H), 7.46 – 7.41 (m, 1H), 7.40 – 7.32 (m, 2H), 6.98 (t,  $J = 7.7$  Hz, 1H), 6.49 (d,  $J = 7.4$  Hz, 1H), 6.41 – 6.30 (m, 2H), 4.32 (dt,  $J = 9.4, 6.9$  Hz, 1H), 4.01 (d,  $J = 8.6$  Hz, 1H), 2.21 (s, 3H), 1.96 – 1.83 (m, 1H), 1.69 – 1.60 (m, 1H), 1.59 – 1.48 (m, 1H), 1.37 – 1.28 (m, 1H), 0.82 (t,  $J = 7.3$  Hz, 3H).  $^{13}\text{C}$  NMR (101 MHz,  $\text{CDCl}_3$ )  $\delta$  147.22 (d,  $J = 6.8$  Hz), 138.95, 131.98 (d,  $J = 2.6$  Hz), 131.80 (d,  $J = 2.5$  Hz), 131.51, 131.42, 131.32, 131.23, 129.05, 128.78, 128.67, 128.45, 128.34, 118.86, 114.16, 110.24, 52.58 (d,  $J = 80.8$  Hz), 32.56 (d,  $J = 4.1$  Hz), 21.56, 19.63 (d,  $J = 10.1$  Hz), 14.00.  $^{31}\text{P}$  NMR (162 MHz,  $\text{CDCl}_3$ )  $\delta$  31.74. HRMS:  $[\text{M}+\text{H}]^+$   $m/z$  calcd for  $\text{C}_{23}\text{H}_{27}\text{NOP}$ : 364.1825; found: 364.1829.

**(1-((3-methoxyphenyl)amino)butyl)diphenylphosphine oxide (5h)**

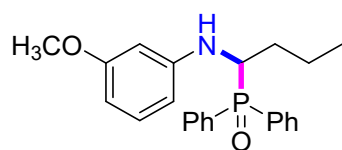

$^1\text{H}$  NMR (400 MHz,  $\text{CDCl}_3$ )  $\delta$  7.93 – 7.85 (m, 2H), 7.84 – 7.75 (m, 2H), 7.60 – 7.41 (m, 4H), 7.40 – 7.34 (m, 2H), 7.00 (t,  $J = 8.1$  Hz, 1H), 6.21 (ddd,  $J = 20.3, 8.1, 2.1$  Hz, 2H), 6.10 (t,  $J = 2.2$  Hz, 1H), 4.38 – 4.18 (m, 2H), 3.72 (s, 3H), 1.92 – 1.78 (m, 1H), 1.75 – 1.49 (m, 2H), 1.40 – 1.30 (m, 1H), 0.83 (t,  $J = 7.3$  Hz, 3H).  $^{13}\text{C}$  NMR (101 MHz,  $\text{CDCl}_3$ )  $\delta$  160.70, 148.73 (d,  $J = 6.7$  Hz), 132.05 (d,  $J = 2.7$  Hz), 131.86 (d,  $J = 2.7$  Hz), 131.43, 131.34, 131.28, 131.19, 130.89, 130.75, 129.96, 128.83, 128.72, 128.50, 128.39, 106.28, 102.94, 99.31, 55.07, 52.49 (d,  $J = 80.2$  Hz), 32.49 (d,  $J = 4.2$  Hz), 19.61 (d,  $J = 10.2$  Hz), 13.99.  $^{31}\text{P}$  NMR (162 MHz,  $\text{CDCl}_3$ )  $\delta$  32.25. HRMS:  $[\text{M}+\text{H}]^+$   $m/z$  calcd for  $\text{C}_{23}\text{H}_{27}\text{NO}_2\text{P}$ : 380.1774; found: 380.1775.

**(1-((3-chlorophenyl)amino)butyl)diphenylphosphine oxide (5i)**

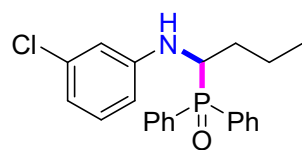

$^1\text{H}$  NMR (400 MHz,  $\text{CDCl}_3$ )  $\delta$  7.94 – 7.85 (m, 2H), 7.82 – 7.73 (m, 2H), 7.59 – 7.49 (m, 3H), 7.47 – 7.41 (m, 1H), 7.40 – 7.33 (m, 2H), 6.96 (t,  $J = 8.0$  Hz, 1H), 6.62 – 6.56 (m, 1H), 6.49 (s, 1H), 6.41 (dd,  $J = 8.2, 2.0$  Hz, 1H), 4.35 (s, 1H),

4.30 – 4.21 (m, 1H), 1.82 (tdd,  $J = 13.9, 6.4, 3.6$  Hz, 1H), 1.76 – 1.63 (m, 1H), 1.61 – 1.49 (m, 1H), 1.39 – 1.30 (m, 1H), 0.84 (t,  $J = 7.3$  Hz, 3H).  $^{13}\text{C}$  NMR (101 MHz,  $\text{CDCl}_3$ )  $\delta$  148.52 (d,  $J = 5.6$  Hz), 134.87, 132.15 (d,  $J = 2.7$  Hz), 131.97 (d,  $J = 2.7$  Hz), 131.32, 131.23, 131.14, 130.13, 128.89, 128.78, 128.53, 128.42, 117.63, 112.68, 111.49, 52.53 (d,  $J = 79.3$  Hz), 32.24 (d,  $J = 4.0$  Hz), 19.58 (d,  $J = 10.3$  Hz), 13.93.  $^{31}\text{P}$  NMR (162 MHz,  $\text{CDCl}_3$ )  $\delta$  31.67. HRMS:  $[\text{M}+\text{H}]^+$   $m/z$  calcd for  $\text{C}_{22}\text{H}_{24}\text{ClNOP}$ : 384.1279; found: 384.1280.

### Diphenyl(1-(*o*-tolylamino)butyl)phosphine oxide (5j)

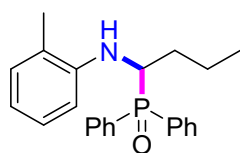

$^1\text{H}$  NMR (400 MHz,  $\text{CDCl}_3$ )  $\delta$  7.94 – 7.85 (m, 2H), 7.84 – 7.74 (m, 2H), 7.60 – 7.42 (m, 4H), 7.39 – 7.32 (m, 2H), 7.08 – 6.93 (m, 2H), 6.61 (dd,  $J = 12.1, 7.7$  Hz, 2H), 4.46 – 4.35 (m, 1H), 3.94 – 3.80 (m, 1H), 2.03 (s, 3H), 1.97 – 1.88 (m, 1H), 1.76 – 1.63 (m, 1H), 1.54 (tdd,  $J = 12.0, 7.4, 4.7$  Hz, 1H), 1.41 – 1.31 (m, 1H), 0.84 (t,  $J = 7.3$  Hz, 3H).  $^{13}\text{C}$  NMR (101 MHz,  $\text{CDCl}_3$ )  $\delta$  145.05 (d,  $J = 6.4$  Hz), 131.98 (d,  $J = 2.5$  Hz), 131.83 (d,  $J = 2.8$  Hz), 131.44, 131.35, 131.25, 131.16, 130.39, 128.80, 128.69, 128.39, 128.28, 126.92, 122.40, 117.44, 110.27, 52.37 (d,  $J = 79.4$  Hz), 32.66 (d,  $J = 4.0$  Hz), 19.64 (d,  $J = 9.7$  Hz), 17.49, 14.04.  $^{31}\text{P}$  NMR (162 MHz,  $\text{CDCl}_3$ )  $\delta$  31.94. HRMS:  $[\text{M}+\text{H}]^+$   $m/z$  calcd for  $\text{C}_{23}\text{H}_{27}\text{NOP}$ : 364.1825; found: 364.1826.

### (1-((2-methoxyphenyl)amino)butyl)diphenylphosphine oxide (5k)

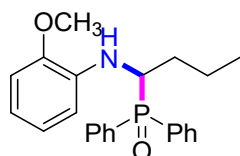

$^1\text{H}$  NMR (400 MHz,  $\text{CDCl}_3$ )  $\delta$  7.95 – 7.80 (m, 4H), 7.58 – 7.42 (m, 4H), 7.41 – 7.34 (m, 2H), 6.79 – 6.67 (m, 2H), 6.62 (td,  $J = 7.7, 1.4$  Hz, 1H), 6.52 (d,  $J = 7.2$  Hz, 1H), 4.53 (dd,  $J = 10.5, 3.2$  Hz, 1H), 4.30 (ddd,  $J = 18.6, 10.3, 3.4$  Hz, 1H), 3.77 (s, 3H), 2.02 – 1.88 (m, 1H), 1.71 – 1.46 (m, 2H), 1.37 – 1.28 (m, 1H), 0.84 (t,  $J = 7.3$  Hz, 3H).  $^{13}\text{C}$  NMR (101 MHz,  $\text{CDCl}_3$ )  $\delta$  146.89, 137.21 (d,  $J = 6.5$  Hz), 131.86 (d,  $J = 2.6$  Hz), 131.73, 131.69, 131.65, 131.37, 131.29, 128.69, 128.58, 128.26, 128.15, 120.98, 117.02, 110.33, 109.80, 55.46, 52.94 (d,  $J = 81.1$  Hz), 32.73 (d,  $J = 4.1$  Hz), 19.60 (d,  $J = 10.5$  Hz), 13.95.  $^{31}\text{P}$  NMR (162 MHz,  $\text{CDCl}_3$ )  $\delta$  30.86. HRMS:  $[\text{M}+\text{H}]^+$   $m/z$  calcd for  $\text{C}_{23}\text{H}_{27}\text{NO}_2\text{P}$ : 380.1774; found: 380.1778.

### (1-((2-chlorophenyl)amino)butyl)diphenylphosphine oxide (5l)

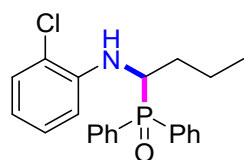

$^1\text{H}$  NMR (400 MHz,  $\text{CDCl}_3$ )  $\delta$  7.96 – 7.81 (m, 4H), 7.59 – 7.45 (m, 4H), 7.44 – 7.37 (m, 2H), 7.18 (dd,  $J = 7.8, 1.3$  Hz, 1H), 7.03 – 6.97 (m, 1H), 6.63 – 6.54 (m, 2H), 4.52 (dd,  $J = 10.3, 2.6$  Hz, 1H), 4.34 (ddd,  $J = 18.7, 10.2, 3.5$  Hz, 1H), 2.06 – 1.94 (m, 1H), 1.73 – 1.60 (m, 1H), 1.59 – 1.46 (m, 1H), 1.41 – 1.29 (m, 1H), 0.86 (t,  $J = 7.3$  Hz, 3H).  $^{13}\text{C}$  NMR (101 MHz,  $\text{CDCl}_3$ )  $\delta$  143.00 (d,  $J = 6.0$  Hz), 132.09 (d,  $J = 2.7$  Hz), 132.00 (d,  $J = 2.7$  Hz), 131.73, 131.64, 131.37, 131.28, 130.98, 130.77, 130.03, 129.35, 128.80, 128.69, 128.50, 128.39, 127.59, 119.62, 117.90, 111.71, 53.08 (d,  $J = 80.4$  Hz), 32.60 (d,  $J = 3.8$  Hz), 19.60 (d,  $J = 10.4$  Hz), 13.91.  $^{31}\text{P}$  NMR (162 MHz,  $\text{CDCl}_3$ )  $\delta$  30.39. HRMS:  $[\text{M}+\text{H}]^+$   $m/z$  calcd for  $\text{C}_{22}\text{H}_{24}\text{ClNOP}$ : 384.1279; found: 384.1281.

**(1-(benzylamino)butyl)di-p-tolylphosphine oxide (6a)**

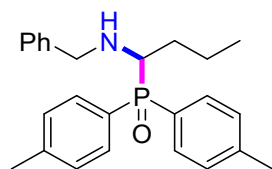

$^1\text{H}$  NMR (400 MHz,  $\text{CDCl}_3$ )  $\delta$  7.83 (dd,  $J = 10.3, 8.1$  Hz, 2H), 7.74 (dd,  $J = 10.4, 8.1$  Hz, 2H), 7.32 – 7.25 (m, 7H), 7.17 – 7.11 (m, 2H), 3.65 (dd,  $J = 42.3, 12.8$  Hz, 2H), 3.41 (ddd,  $J = 9.5, 6.0, 3.9$  Hz, 1H), 2.41 (d,  $J = 6.1$  Hz, 6H), 2.09 – 1.98 (m, 1H), 1.81 (ddt,  $J = 13.8, 8.3, 6.0$  Hz, 1H), 1.64 – 1.48 (m, 2H), 1.44 – 1.32 (m, 1H), 0.85 (t,  $J = 7.2$  Hz, 3H).  $^{13}\text{C}$  NMR (101 MHz,  $\text{CDCl}_3$ )  $\delta$  141.96 (t,  $J = 3.0$  Hz), 139.87, 131.80, 131.72, 131.32, 131.24, 129.91, 129.32, 129.20, 129.08, 129.03, 128.98, 128.69, 128.33, 128.27, 128.08, 127.06, 56.73 (d,  $J = 81.8$  Hz), 52.88 (d,  $J = 7.1$  Hz), 31.68 (d,  $J = 3.5$  Hz), 21.59, 19.86 (d,  $J = 10.2$  Hz), 14.02.  $^{31}\text{P}$  NMR (162 MHz,  $\text{CDCl}_3$ )  $\delta$  31.89. HRMS:  $[\text{M}+\text{H}]^+$   $m/z$  calcd for  $\text{C}_{25}\text{H}_{31}\text{NOP}$ : 392.2138; found: 392.2136.

**(1-(benzylamino)butyl)bis(4-chlorophenyl)phosphine oxide (6b)**

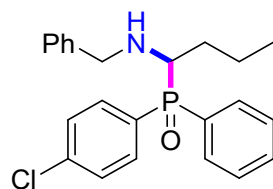

$^1\text{H}$  NMR (400 MHz,  $\text{CDCl}_3$ )  $\delta$  7.87 (dd,  $J = 10.0, 8.5$  Hz, 2H), 7.79 (dd,  $J = 10.2, 8.4$  Hz, 2H), 7.46 (dd,  $J = 8.4, 2.1$  Hz, 4H), 7.29 (q,  $J = 5.5$  Hz, 3H), 7.15 – 7.09 (m, 2H), 3.66 (dd,  $J = 59.1, 12.8$  Hz, 2H), 3.40 (td,  $J = 7.9, 4.1$  Hz, 1H), 2.01 (s, 1H), 1.93 – 1.79 (m, 1H), 1.63 – 1.47 (m, 2H), 1.37 (ddd,  $J = 14.4, 11.3, 7.3$

Hz, 1H), 0.88 (t,  $J = 7.1$  Hz, 3H).  $^{13}\text{C}$  NMR (101 MHz,  $\text{CDCl}_3$ )  $\delta$  139.24, 138.48 (dd,  $J = 5.8, 3.3$  Hz), 133.28, 133.19, 132.75, 132.65, 131.34, 130.41, 130.17, 129.23, 129.03, 128.89 (d,  $J = 4.7$  Hz), 128.75, 128.45, 128.30, 127.35, 56.80 (d,  $J = 85.7$  Hz), 53.16 (d,  $J = 8.5$  Hz), 31.73 (d,  $J = 3.5$  Hz), 19.81 (d,  $J = 10.0$  Hz), 14.03.  $^{31}\text{P}$  NMR (162 MHz,  $\text{CDCl}_3$ )  $\delta$  29.90. HRMS:  $[\text{M}+\text{H}]^+$   $m/z$  calcd for  $\text{C}_{23}\text{H}_{25}\text{Cl}_2\text{NOP}$ : 432.1045; found: 432.1048.

#### butyl bis(4-methoxyphenyl)phosphinate (D)

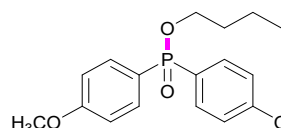

$^1\text{H}$  NMR (400 MHz,  $\text{CDCl}_3$ )  $\delta$  7.74 – 7.65 (m, 4H), 6.95 – 6.87 (m, 4H), 3.95 (q,  $J = 6.6$  Hz, 2H), 3.81 (s, 6H), 1.70 – 1.61 (m, 2H), 1.44 – 1.34 (m, 2H), 0.88 (t,  $J = 7.4$  Hz, 3H). HRMS:  $[\text{M}+\text{H}]^+$   $m/z$  calcd for  $\text{C}_{18}\text{H}_{24}\text{O}_4\text{P}$ : 335.1407; found: 335.1410.

#### (1-(benzylamino)propyl)diphenylphosphine oxide (6e)

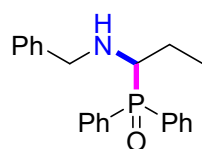

$^1\text{H}$  NMR (400 MHz,  $\text{CDCl}_3$ )  $\delta$  8.00 – 7.92 (m, 2H), 7.91 – 7.83 (m, 2H), 7.56 – 7.44 (m, 6H), 7.27 (dt,  $J = 14.6, 4.9$  Hz, 3H), 7.17 – 7.09 (m, 2H), 3.68 (dd,  $J = 53.5, 12.9$  Hz, 2H), 3.39 (ddd,  $J = 8.1, 6.3, 4.3$  Hz, 1H), 2.11 (s, 1H), 2.01 – 1.86 (m, 1H), 1.62 (td,  $J = 15.3, 7.8$  Hz, 1H), 1.02 (t,  $J = 7.4$  Hz, 3H).  $^{13}\text{C}$  NMR (101 MHz,  $\text{CDCl}_3$ )  $\delta$  139.66, 133.17, 132.31 (d,  $J = 9.7$  Hz), 131.78, 131.70, 131.66 – 131.58 (m), 131.43, 131.30, 131.22, 128.58, 128.47, 128.44, 128.33, 128.30, 127.12, 57.98 (d,  $J = 82.0$  Hz), 52.67 (d,  $J = 8.0$  Hz), 22.37 (d,  $J = 3.8$  Hz), 11.14 (d,  $J = 9.7$  Hz).  $^{31}\text{P}$  NMR (162 MHz,  $\text{CDCl}_3$ )  $\delta$  31.12 (d,  $J = 2.2$  Hz). HRMS:  $[\text{M}+\text{H}]^+$   $m/z$  calcd for  $\text{C}_{22}\text{H}_{25}\text{NOP}$ : 350.1668; found: 350.1665.

#### (1-(benzylamino)pentyl)diphenylphosphine oxide (6f)

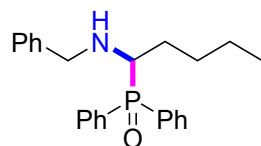

$^1\text{H}$  NMR (400 MHz,  $\text{CDCl}_3$ )  $\delta$  8.02 – 7.92 (m, 2H), 7.92 – 7.84 (m, 2H), 7.54 – 7.42 (m, 6H), 7.31 – 7.22 (m, 3H), 7.16 – 7.08 (m, 2H), 3.64 (dd,  $J = 48.0, 12.8$  Hz, 2H), 3.48 – 3.38 (m, 1H), 1.86 (ddt,  $J = 11.8, 10.3, 4.0$  Hz, 1H), 1.66 – 1.47 (m, 3H), 1.39 – 1.20 (m, 3H), 0.82 (t,  $J = 7.3$  Hz, 3H).  $^{13}\text{C}$  NMR (101 MHz,  $\text{CDCl}_3$ )  $\delta$  139.71, 133.21, 132.35 (d,  $J = 8.4$  Hz), 131.95 – 131.10 (m), 128.47 (dt,  $J = 14.5, 8.7$

Hz), 127.11, 57.20, 56.39, 52.83 (d,  $J = 7.3$  Hz), 29.18 (d,  $J = 3.6$  Hz), 28.70 (d,  $J = 9.6$  Hz), 22.58, 13.91.  $^{31}\text{P}$  NMR (162 MHz,  $\text{CDCl}_3$ )  $\delta$  31.06. HRMS:  $[\text{M}+\text{H}]^+$   $m/z$  calcd for  $\text{C}_{24}\text{H}_{29}\text{NOP}$ : 378.1981; found: 378.1985.

**(1-(benzylamino)-2-phenylethyl)diphenylphosphine oxide (6h)**

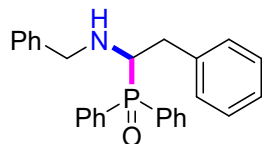

$^1\text{H}$  NMR (400 MHz,  $\text{CDCl}_3$ )  $\delta$  8.06 – 7.98 (m, 2H), 7.90 – 7.87 (m, 2H), 7.53 – 7.44 (m, 6H), 7.31-7.25 (m, 5H), 7.20 – 7.14 (m, 5H), 4.46 (d,  $J = 6.0$  Hz, 1H), 3.74 – 3.69 (m, 1H), 3.37 – 3.20 (m, 3H), 2.74 (ddd,  $J = 14.2, 10.6, 8.0$  Hz, 1H).  $^{13}\text{C}$  NMR (101 MHz,  $\text{CDCl}_3$ )  $\delta$  139.21, 138.41 (d,  $J = 12.9$  Hz), 131.99, 131.91, 131.82 (d,  $J = 2.5$  Hz), 131.39, 131.31, 129.29, 128.71, 128.63, 128.59, 128.50, 128.39, 128.32, 128.26, 128.20, 127.75, 127.01, 126.67, 59.16 (d,  $J = 84.4$  Hz), 53.32 (d,  $J = 6.8$  Hz), 36.08 (d,  $J = 4.6$  Hz).  $^{31}\text{P}$  NMR (162 MHz,  $\text{CDCl}_3$ )  $\delta$  30.58. HRMS:  $[\text{M}+\text{H}]^+$   $m/z$  calcd for  $\text{C}_{27}\text{H}_{27}\text{NOP}$ : 412.1825; found: 412.1830.

## 4. NMR spectra for products 4, 5, 6

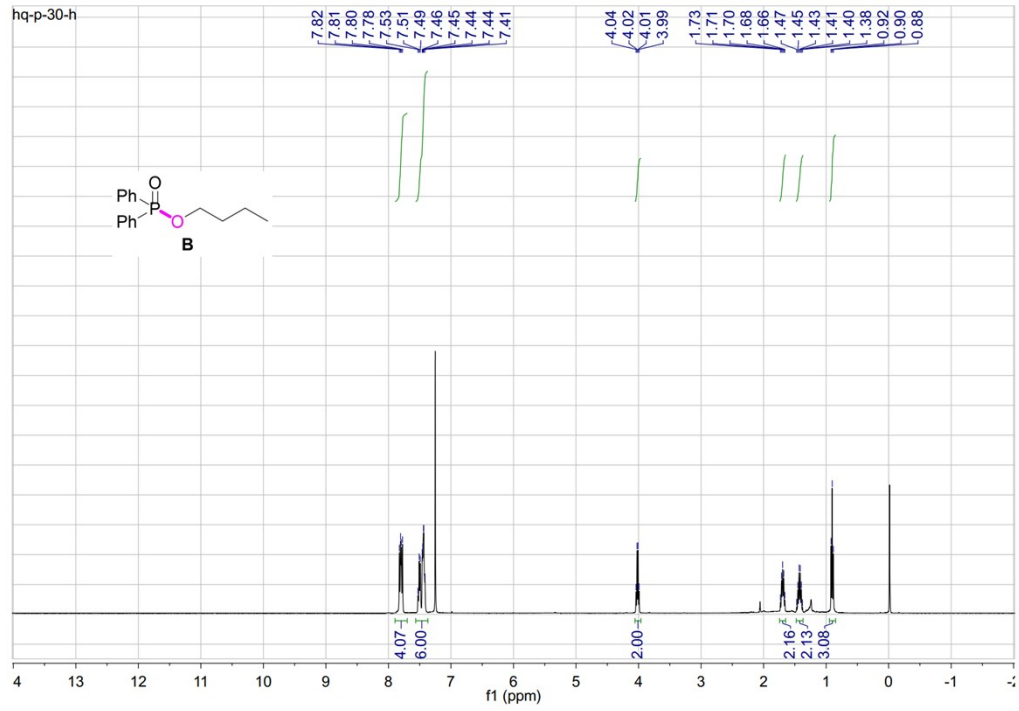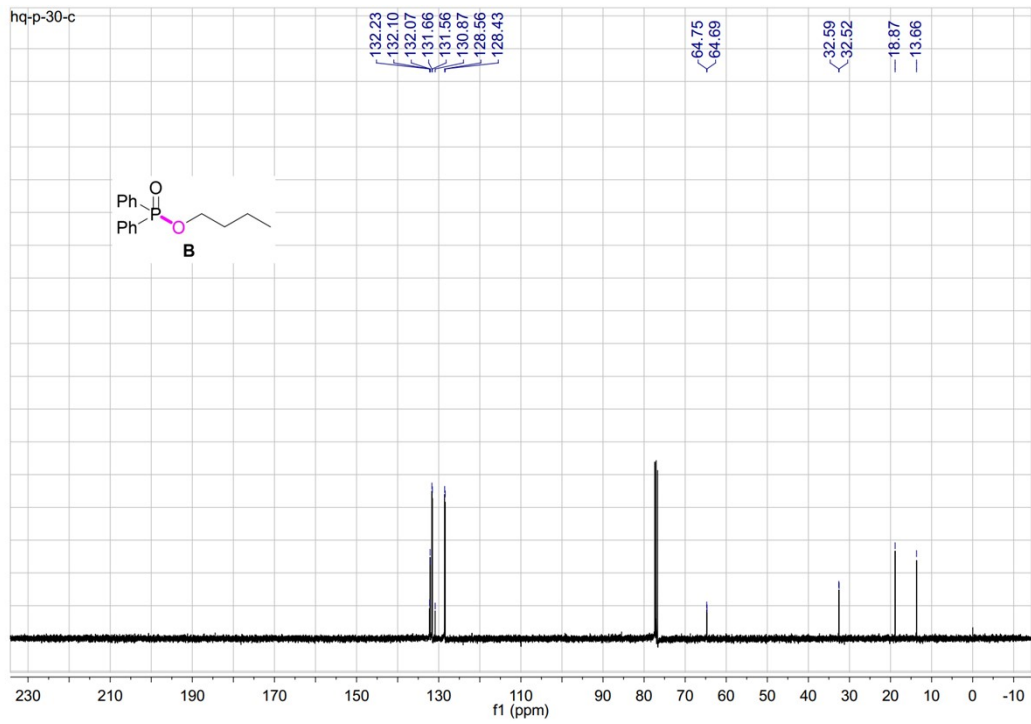

Mar18-2024 HQ-LY01

-31.08

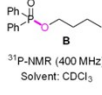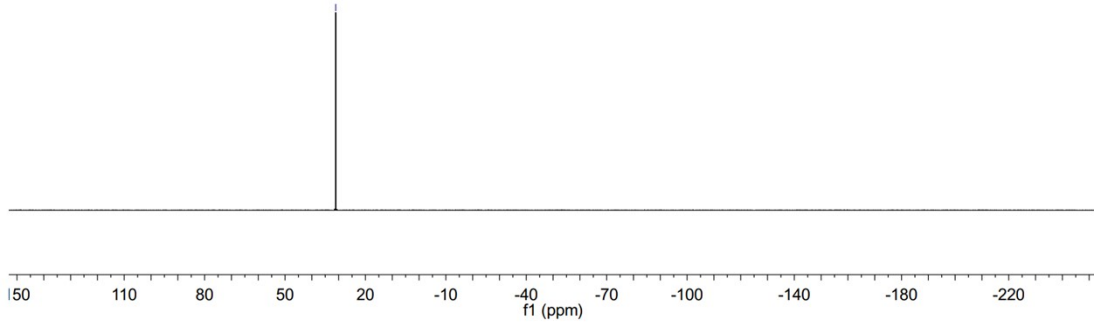

hq-jx-24218-3-2-h

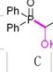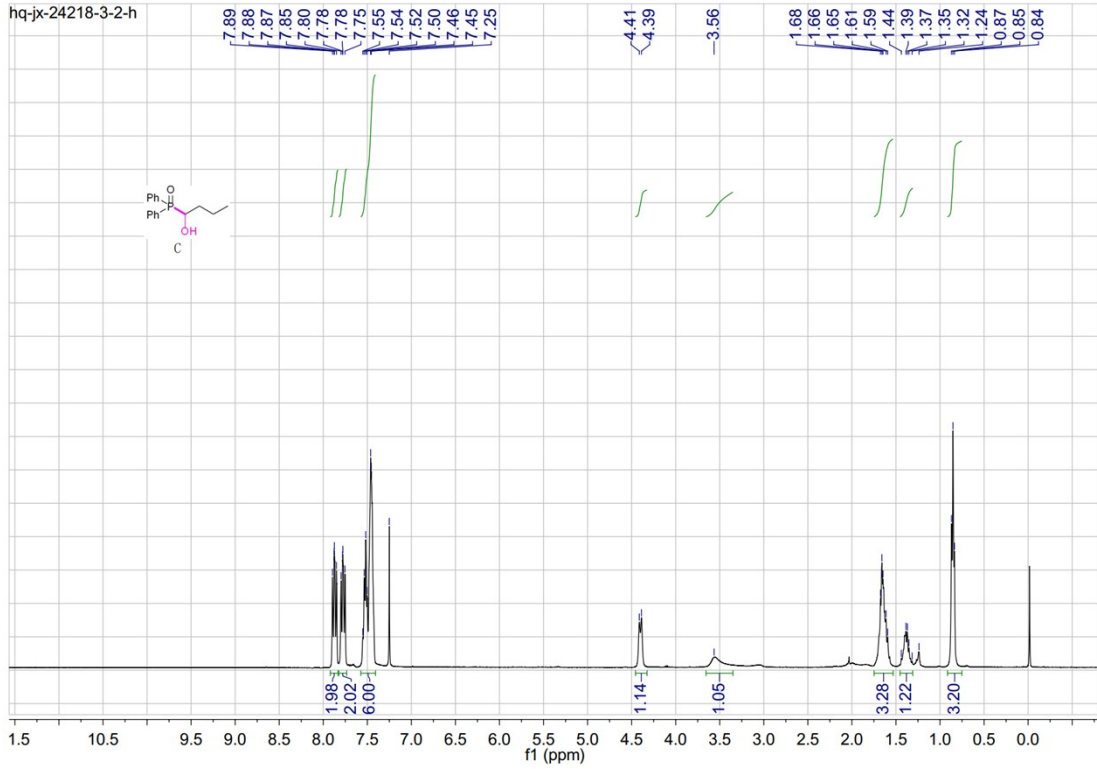

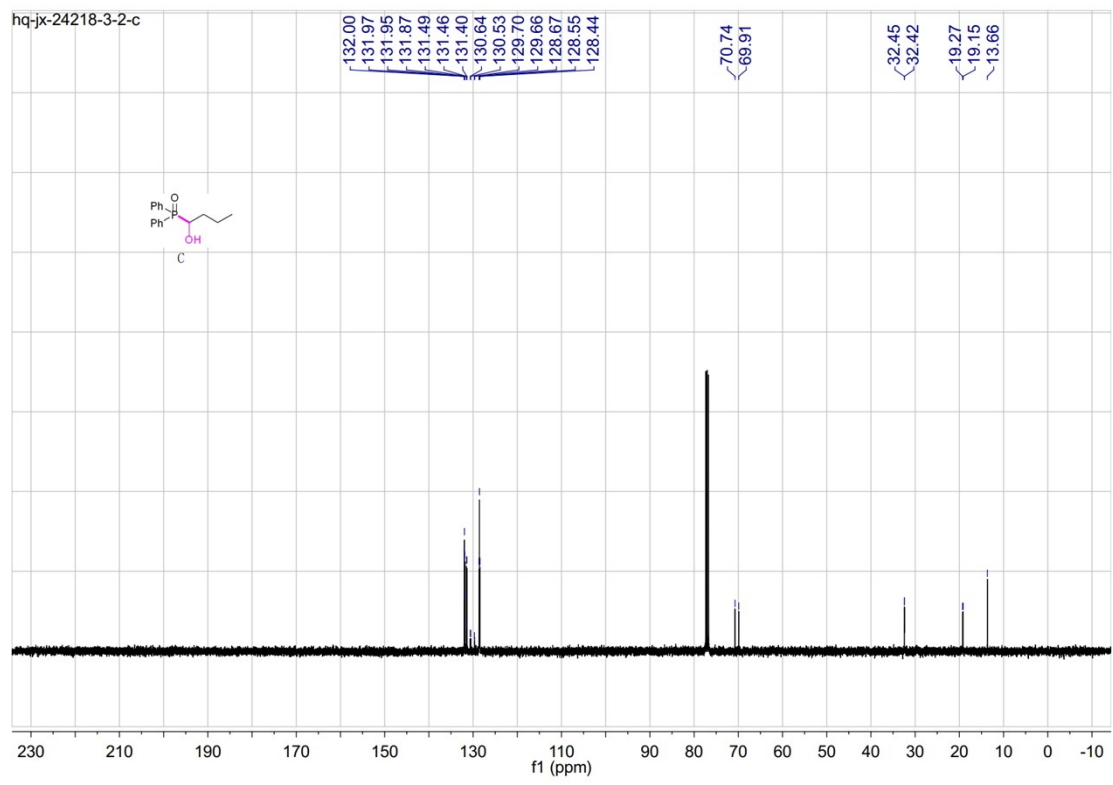

Mar18-2024 HQ-LY-P

—31.86

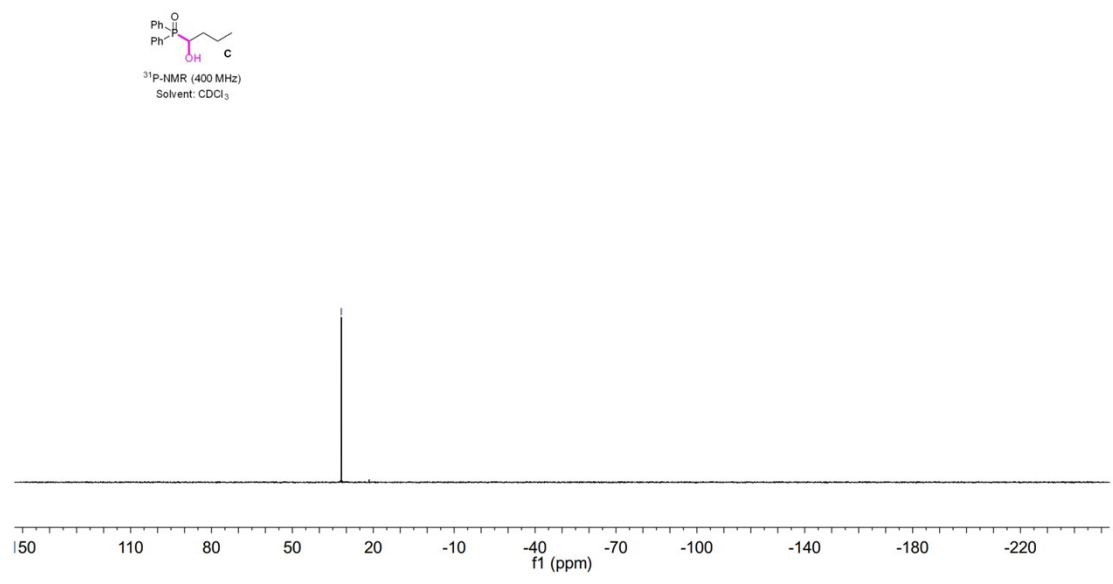



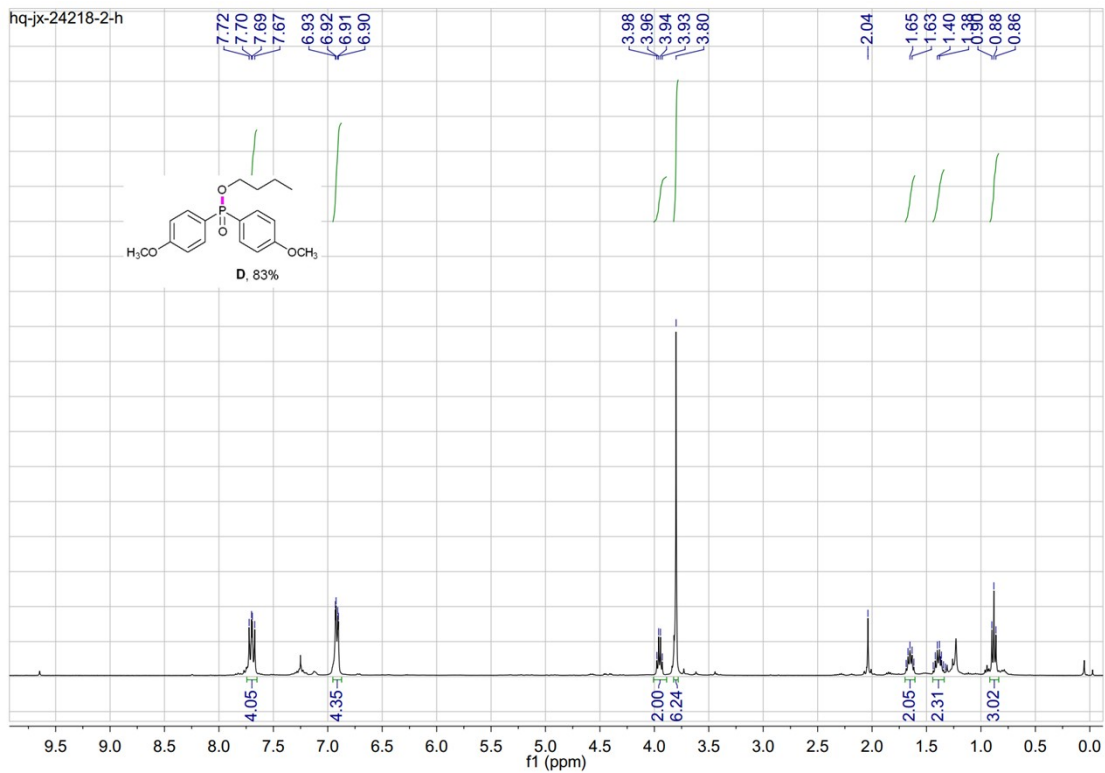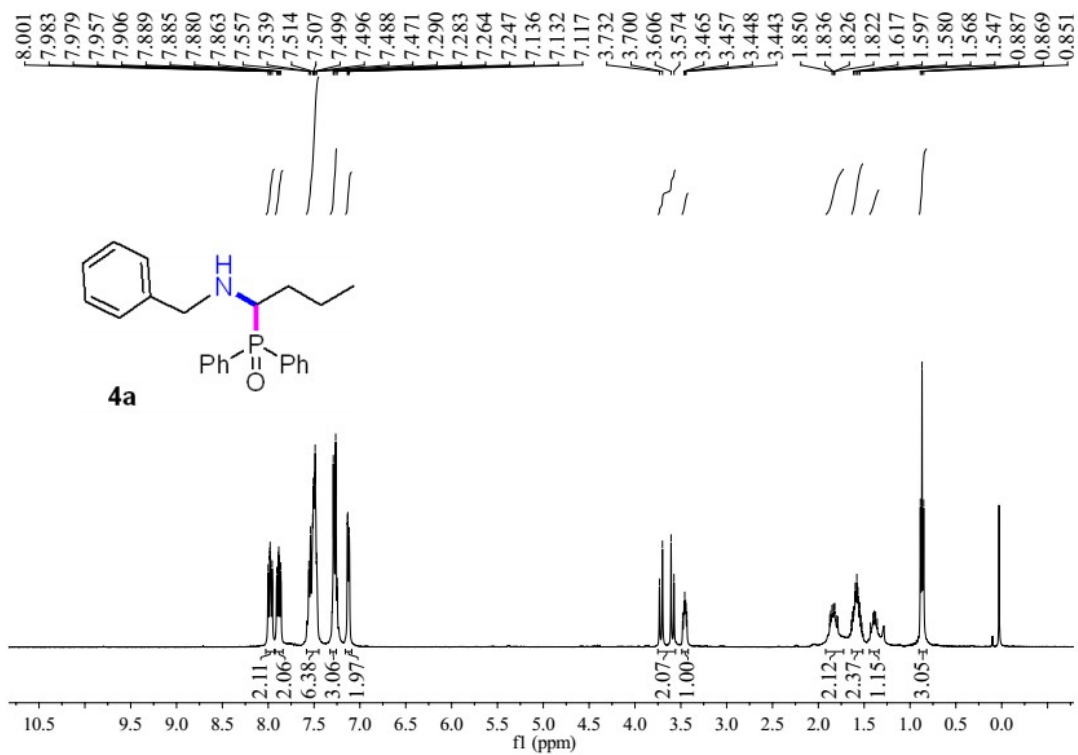

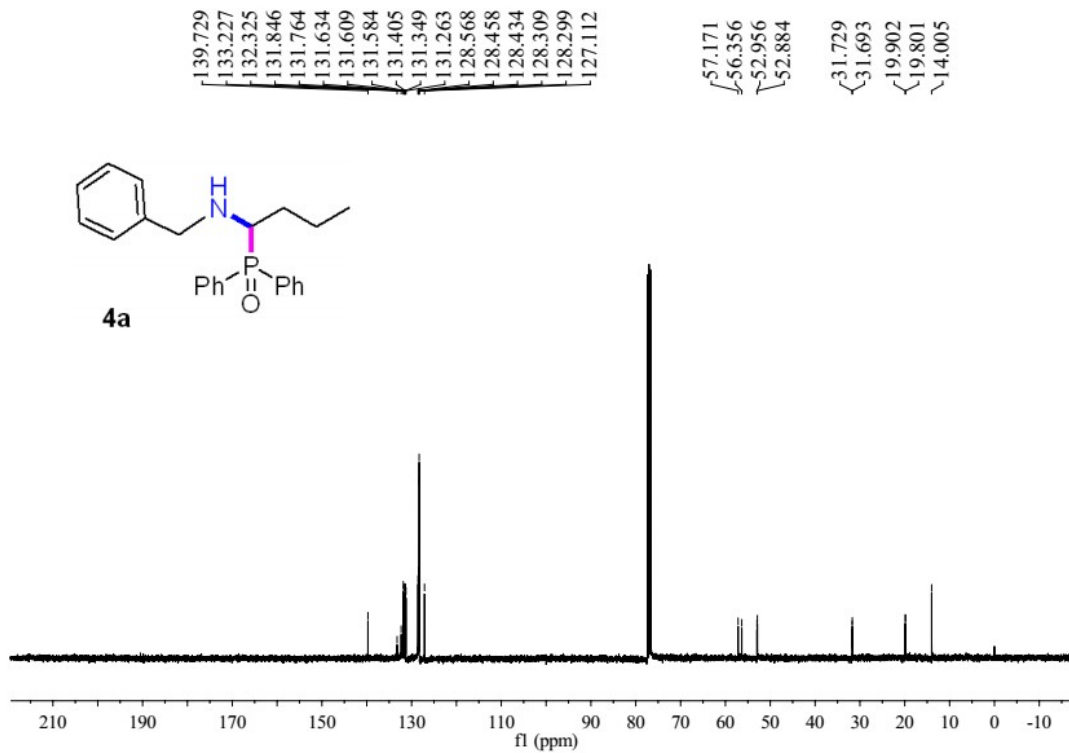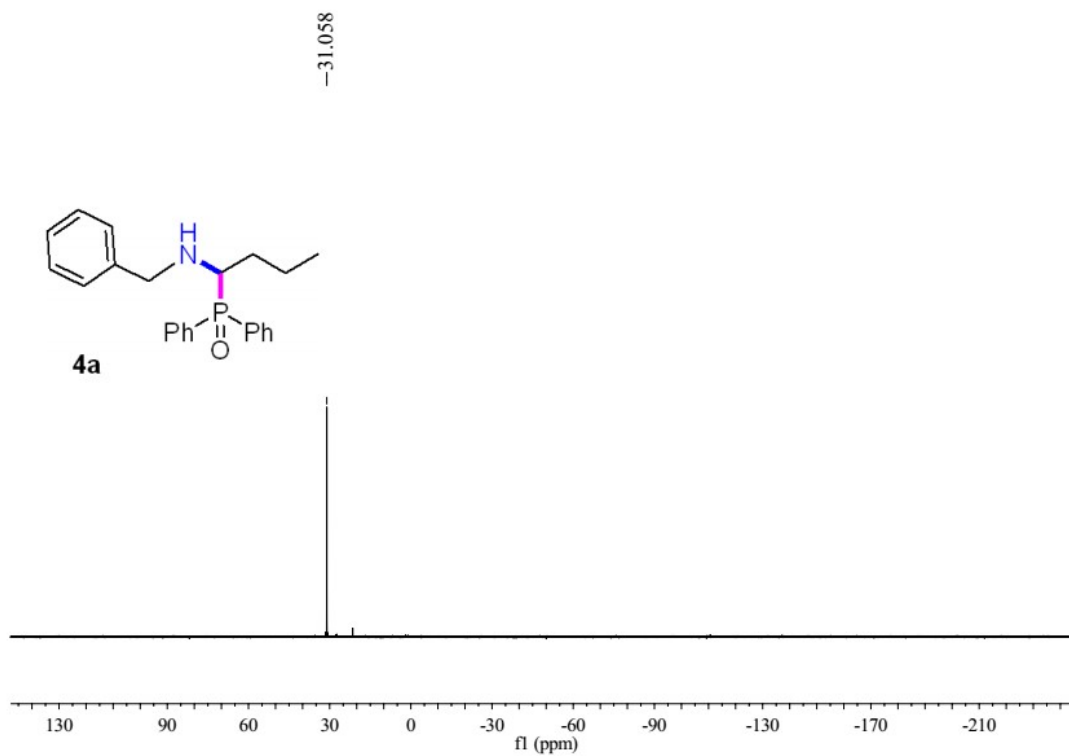

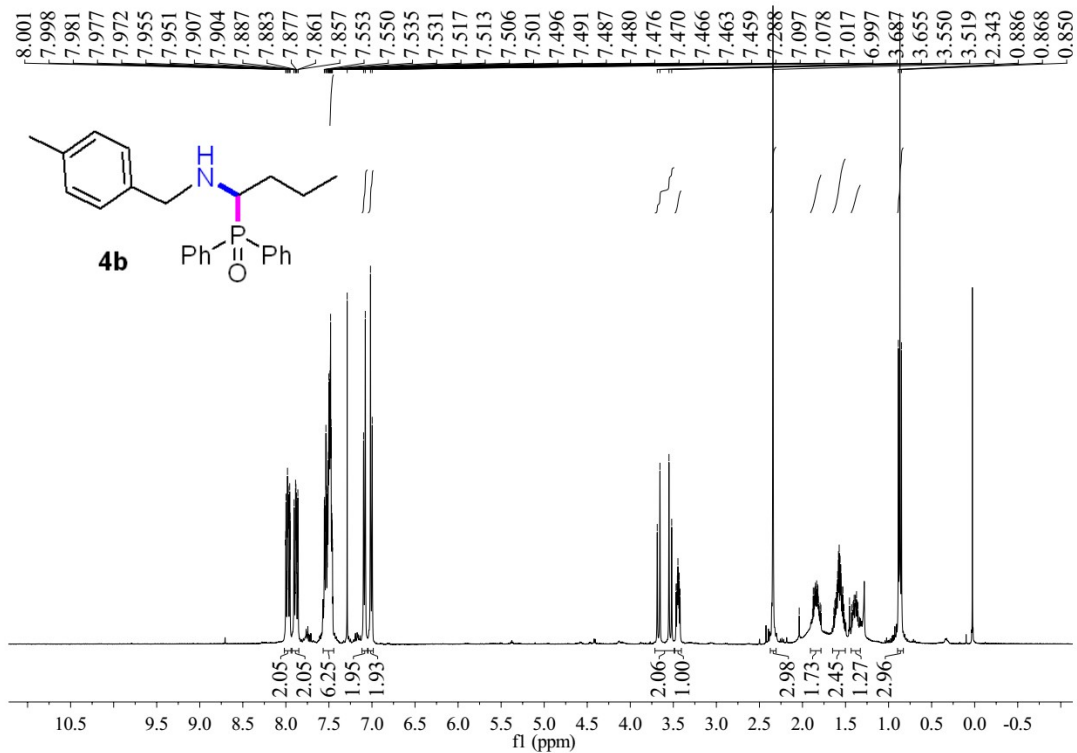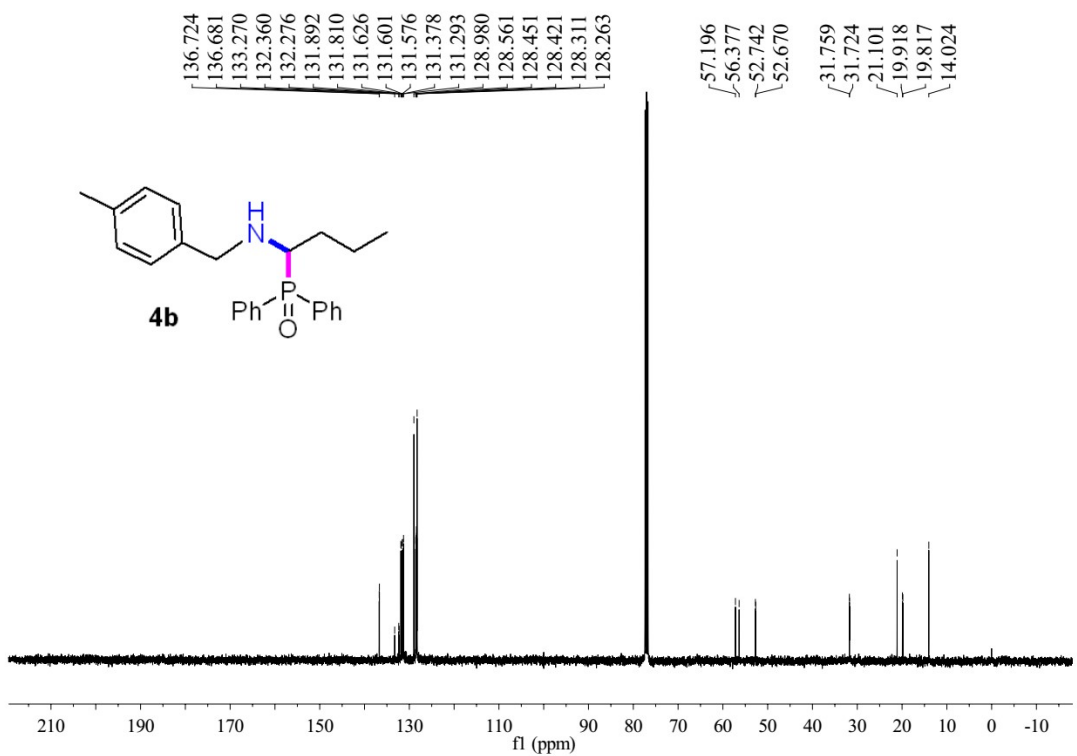

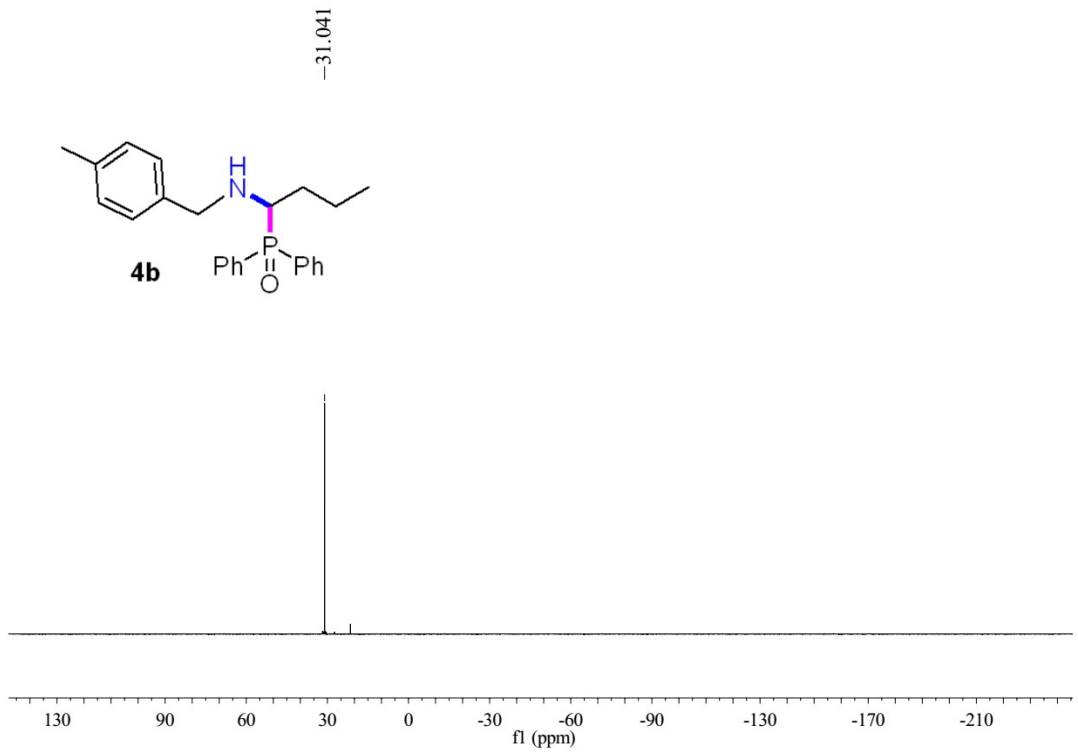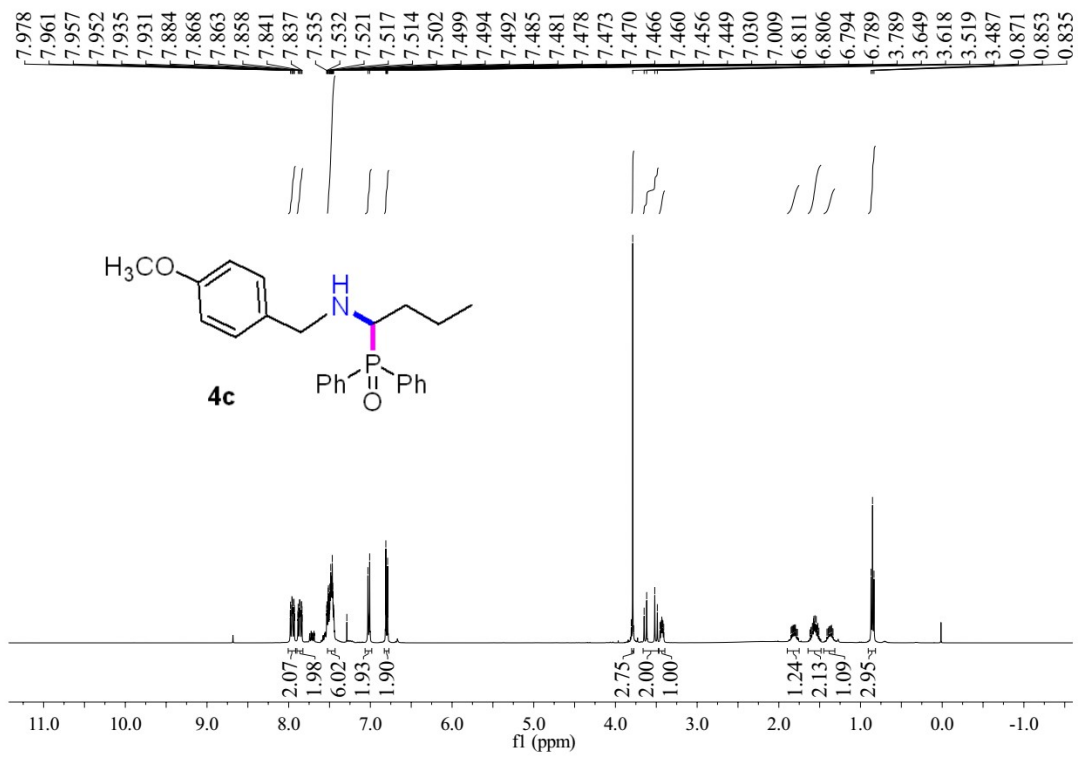

7.978  
7.961  
7.957  
7.952  
7.935  
7.931  
7.884  
7.868  
7.863  
7.858  
7.841  
7.837  
7.535  
7.532  
7.521  
7.517  
7.514  
7.502  
7.499  
7.494  
7.492  
7.485  
7.481  
7.478  
7.473  
7.470  
7.466  
7.460  
7.456  
7.449  
7.030  
7.009  
6.811  
6.806  
6.794  
6.789  
3.789  
3.649  
3.618  
3.519  
3.487  
0.871  
0.853  
0.835

2.07  
1.98  
6.02  
1.93  
1.90  
2.75  
2.00  
1.00  
1.24  
2.13  
1.09  
2.95

158.726  
132.245  
131.827  
131.805  
131.744  
131.642  
131.620  
131.598  
131.324  
131.238  
130.766  
130.652  
129.490  
128.569  
128.459  
128.429  
128.320  
56.107  
55.263  
52.339  
52.266  
31.732  
31.697  
19.899  
19.798  
14.023

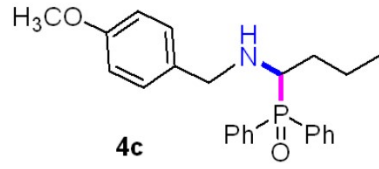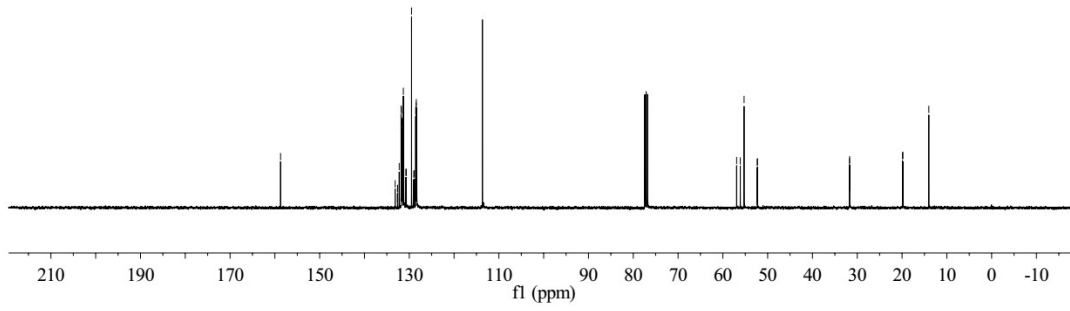

31.272

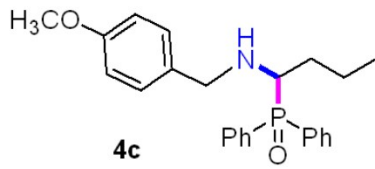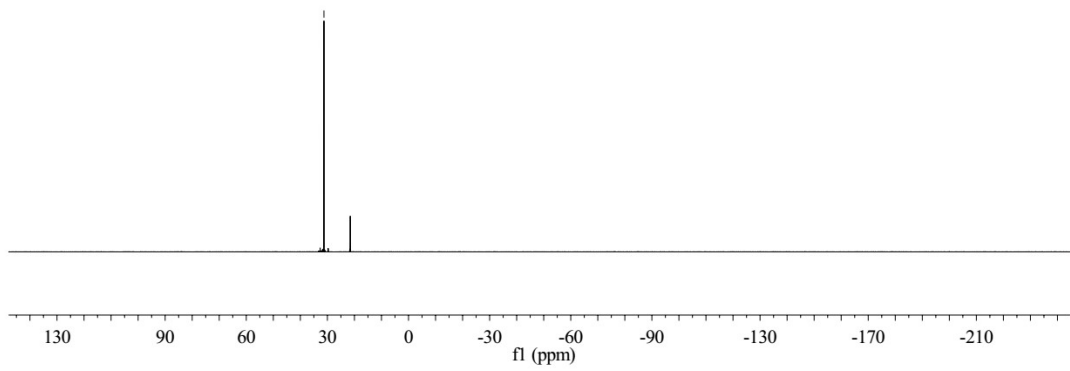

7.968  
7.951  
7.947  
7.942  
7.925  
7.921  
7.883  
7.880  
7.863  
7.859  
7.854  
7.837  
7.833  
7.558  
7.555  
7.540  
7.537  
7.533  
7.519  
7.514  
7.512  
7.504  
7.502  
7.493  
7.485  
7.477  
7.472  
7.468  
7.289  
7.075  
7.061  
7.053  
7.040  
6.960  
6.938  
6.917  
6.911  
3.679  
3.572  
3.540  
1.573  
0.880  
0.862  
0.844

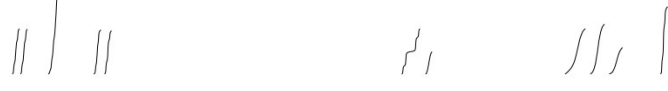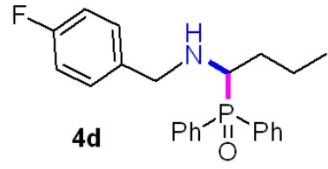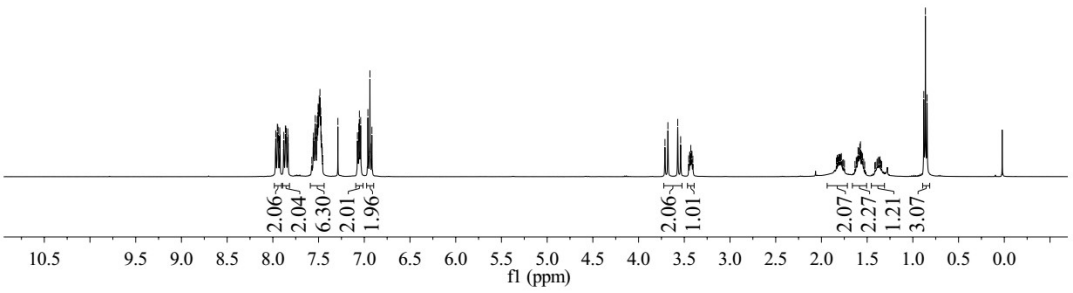

163.171  
160.737  
131.708  
131.627  
129.847  
128.601  
128.491  
128.437  
128.139  
114.928  
56.876  
56.070  
52.021  
51.950  
31.680  
31.643  
19.898  
19.798  
13.983

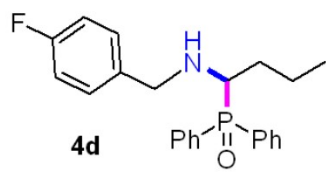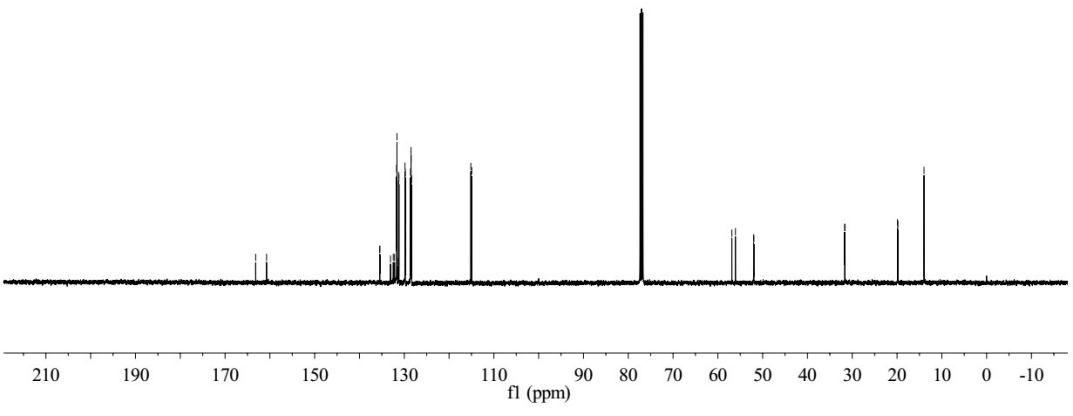

-31.212

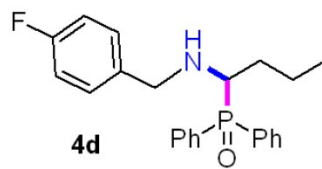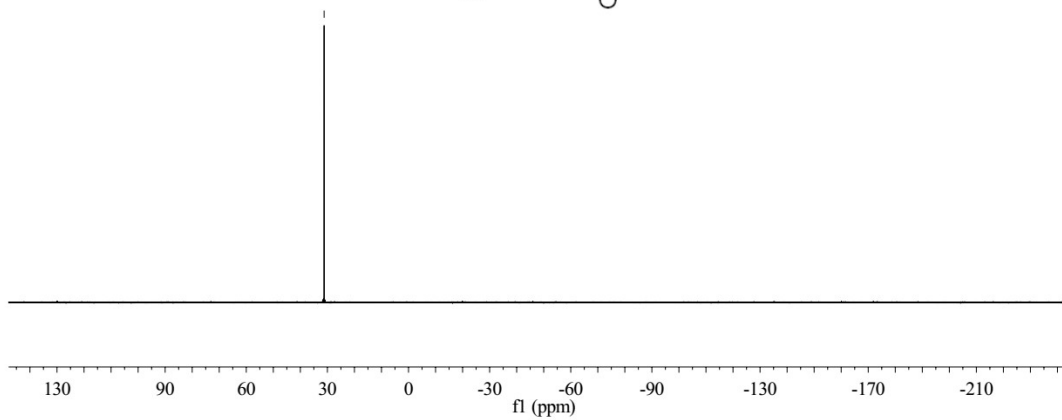

-115.719

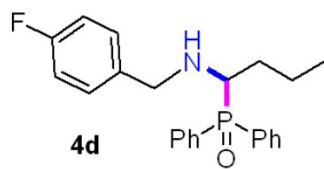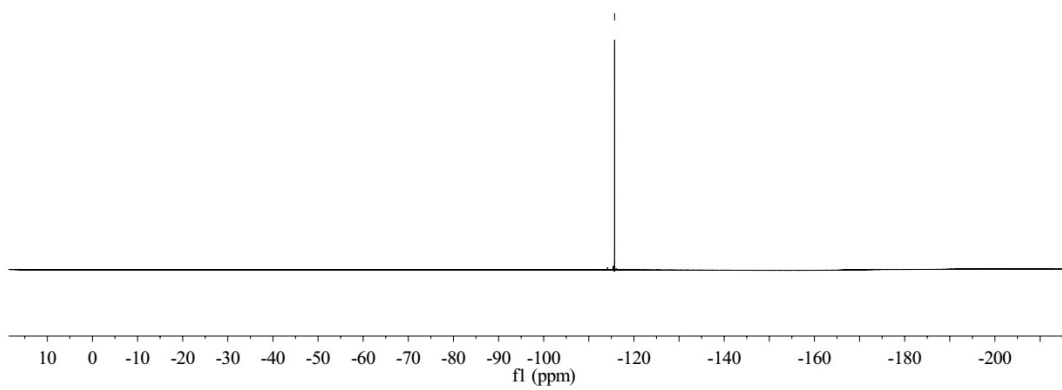

7.945  
7.927  
7.923  
7.918  
7.901  
7.897  
7.865  
7.862  
7.845  
7.841  
7.836  
7.819  
7.815  
7.565  
7.562  
7.547  
7.544  
7.540  
7.536  
7.529  
7.521  
7.517  
7.511  
7.501  
7.492  
7.490  
7.475  
7.468  
7.465  
7.461  
7.458  
7.288  
7.212  
7.192  
3.838  
3.804  
3.681  
3.647  
3.434  
1.602  
1.592  
0.884  
0.866  
0.848

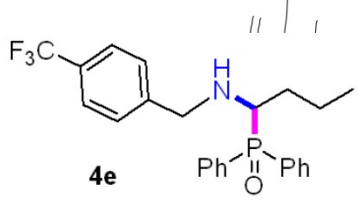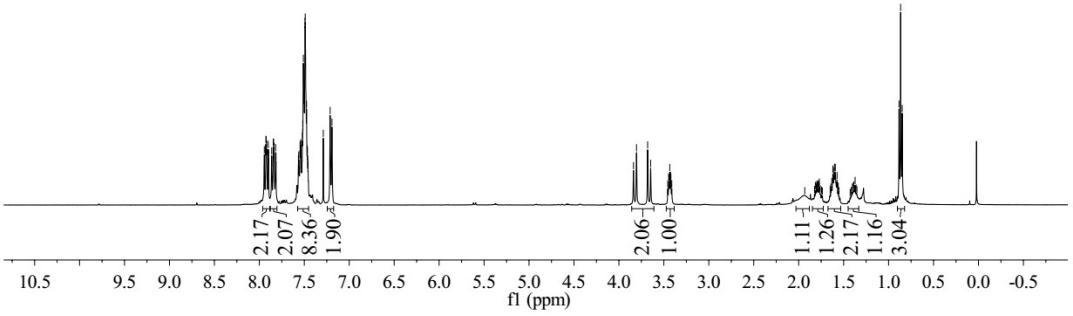

143.900  
131.758  
131.739  
131.602  
131.517  
131.208  
131.121  
128.669  
128.560  
128.451  
128.417  
125.228  
125.191  
125.154  
56.955  
56.160  
52.127  
52.055  
31.635  
31.598  
19.908  
19.808  
13.966

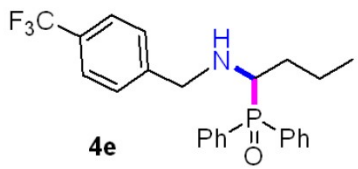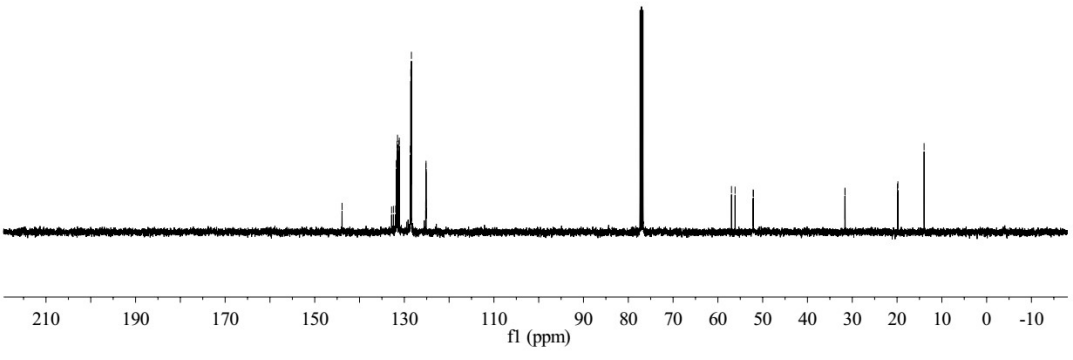



-31.39

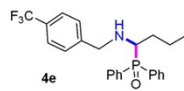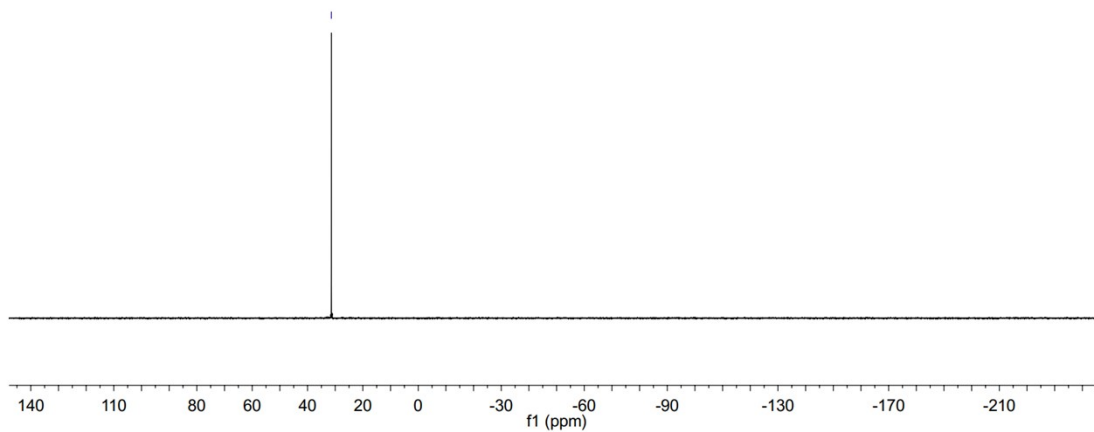

-62.422

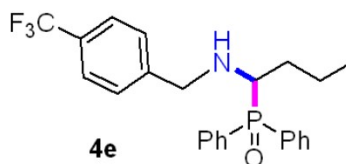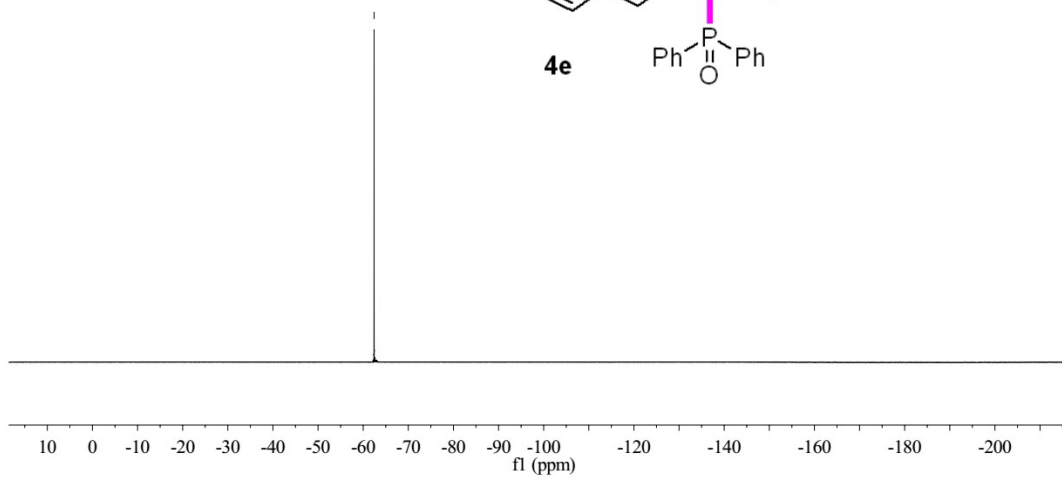

7.924  
7.922  
7.904  
7.900  
7.898  
7.895  
7.878  
7.874  
7.844  
7.840  
7.824  
7.820  
7.817  
7.814  
7.797  
7.793  
7.749  
7.546  
7.531  
7.528  
7.522  
7.518  
7.507  
7.504  
7.500  
7.491  
7.487  
7.479  
7.472  
7.466  
7.459  
7.454  
7.450  
7.186  
7.165  
3.839  
3.804  
3.683  
3.648  
3.418  
1.599  
0.859  
0.841  
0.823

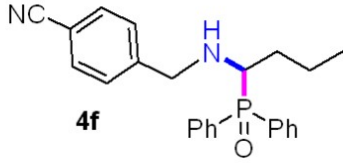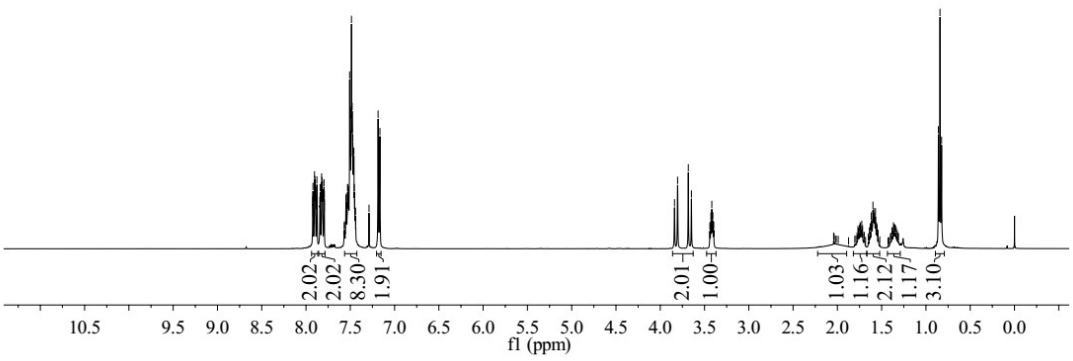

-145.502  
132.027  
131.796  
131.769  
131.736  
131.474  
131.389  
131.136  
131.049  
128.711  
128.599  
128.586  
128.490  
118.890  
110.770  
56.190  
52.042  
51.975  
31.570  
31.531  
19.884  
19.783  
13.945

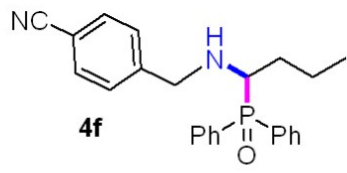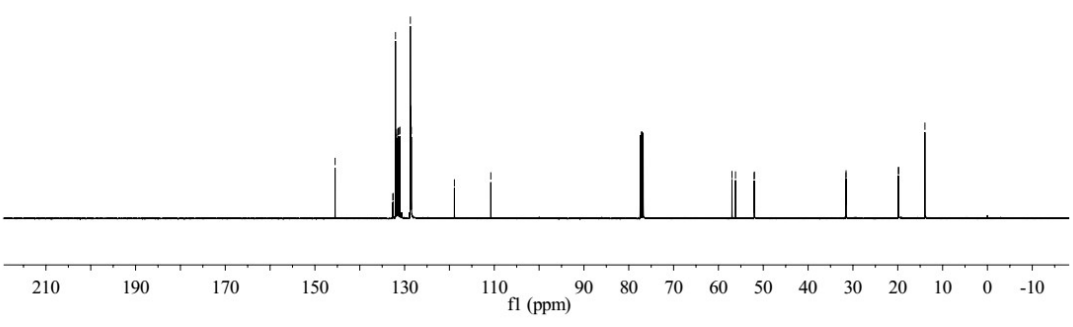

-31.51

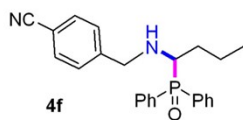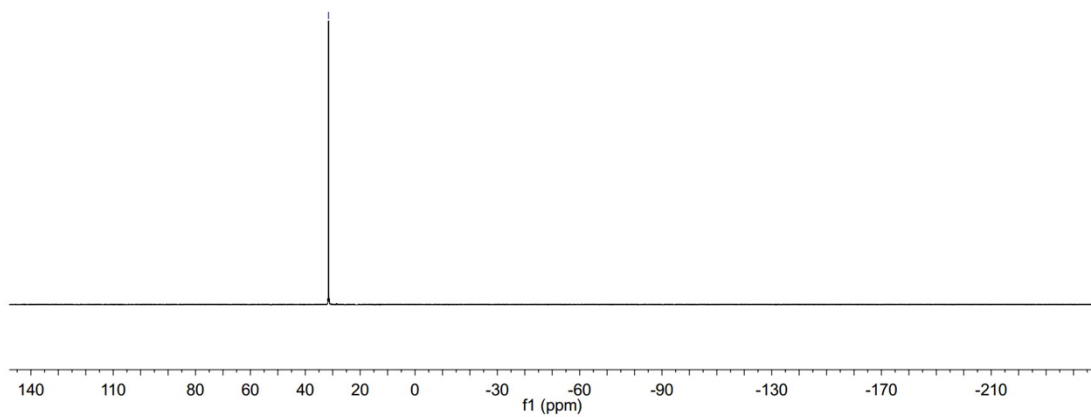

7.999  
7.981  
7.977  
7.972  
7.955  
7.951  
7.903  
7.886  
7.882  
7.880  
7.877  
7.860  
7.856  
7.556  
7.553  
7.538  
7.535  
7.520  
7.516  
7.511  
7.503  
7.500  
7.496  
7.492  
7.489  
7.485  
7.478  
7.471  
7.468  
7.464  
7.288  
7.169  
7.149  
7.070  
6.931  
6.914  
3.709  
3.677  
3.573  
3.541  
2.317  
0.888  
0.870  
0.852

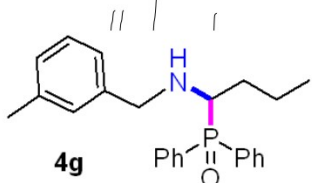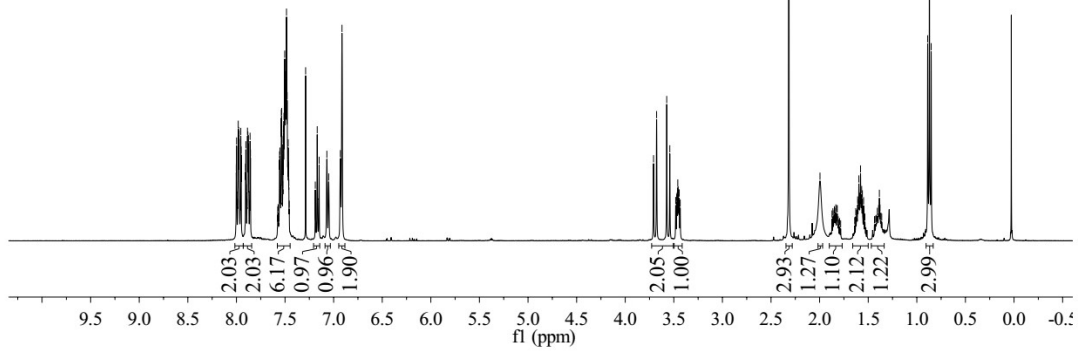

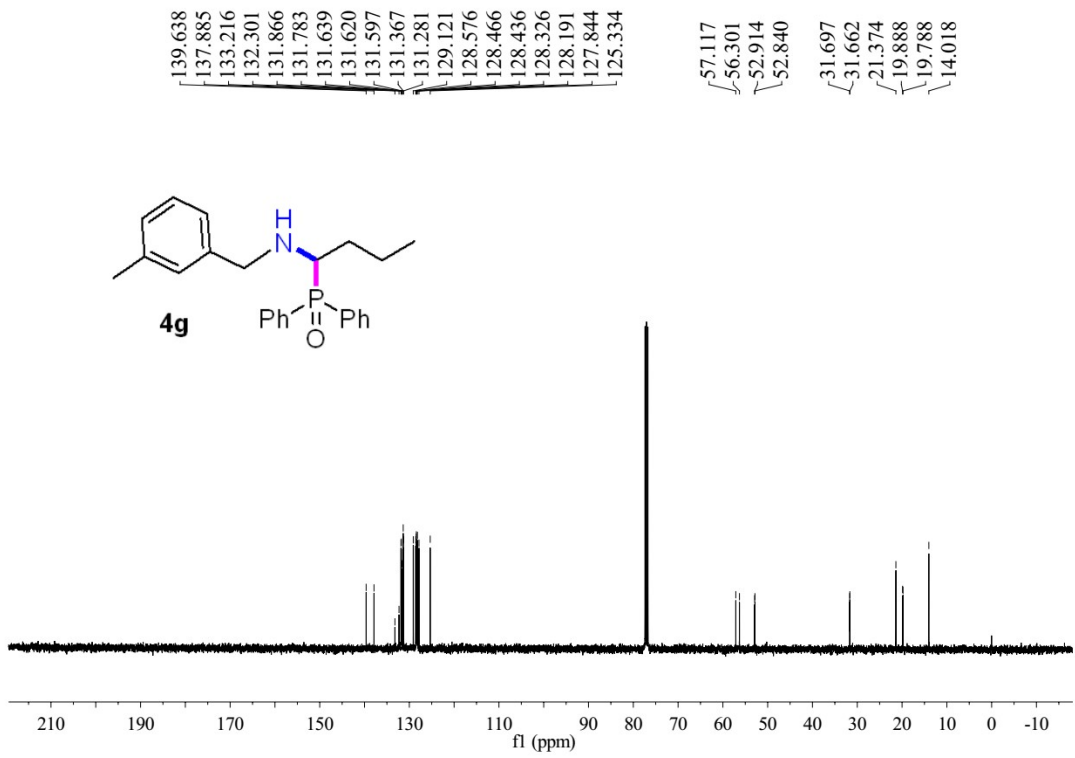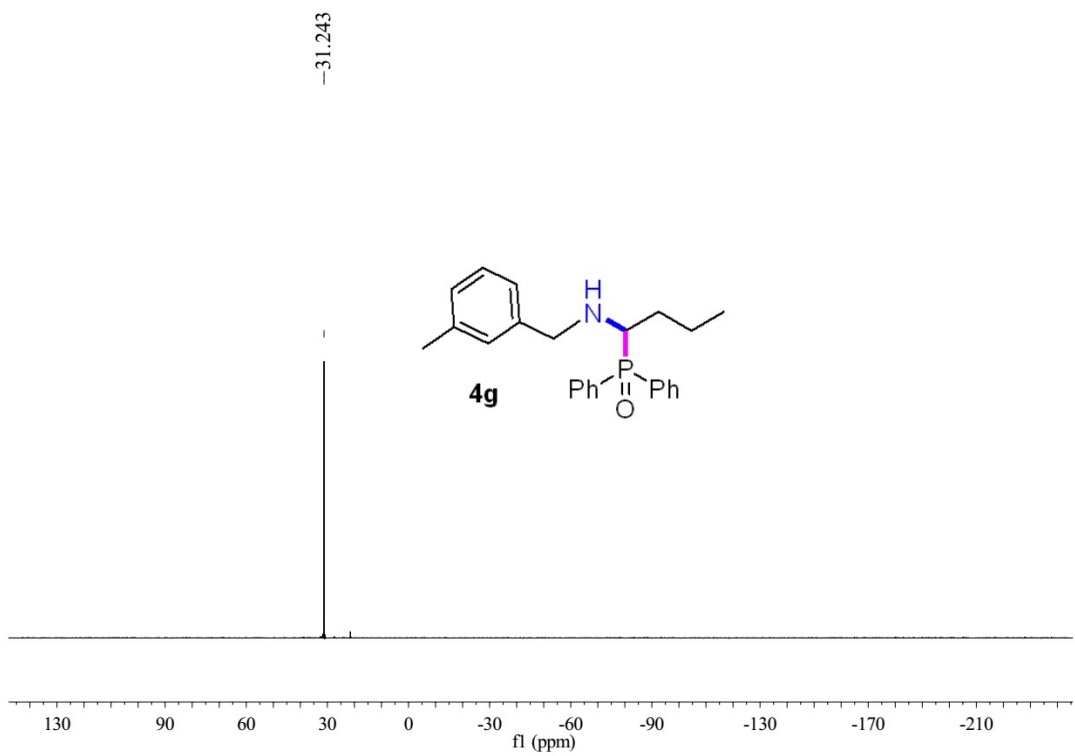

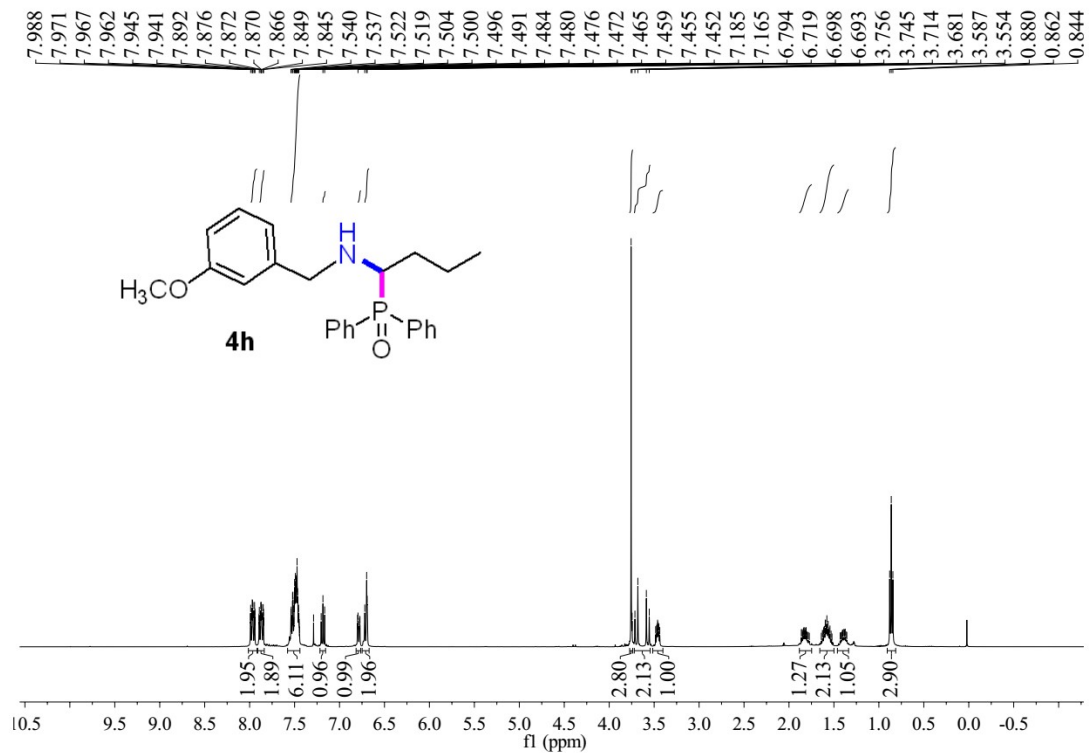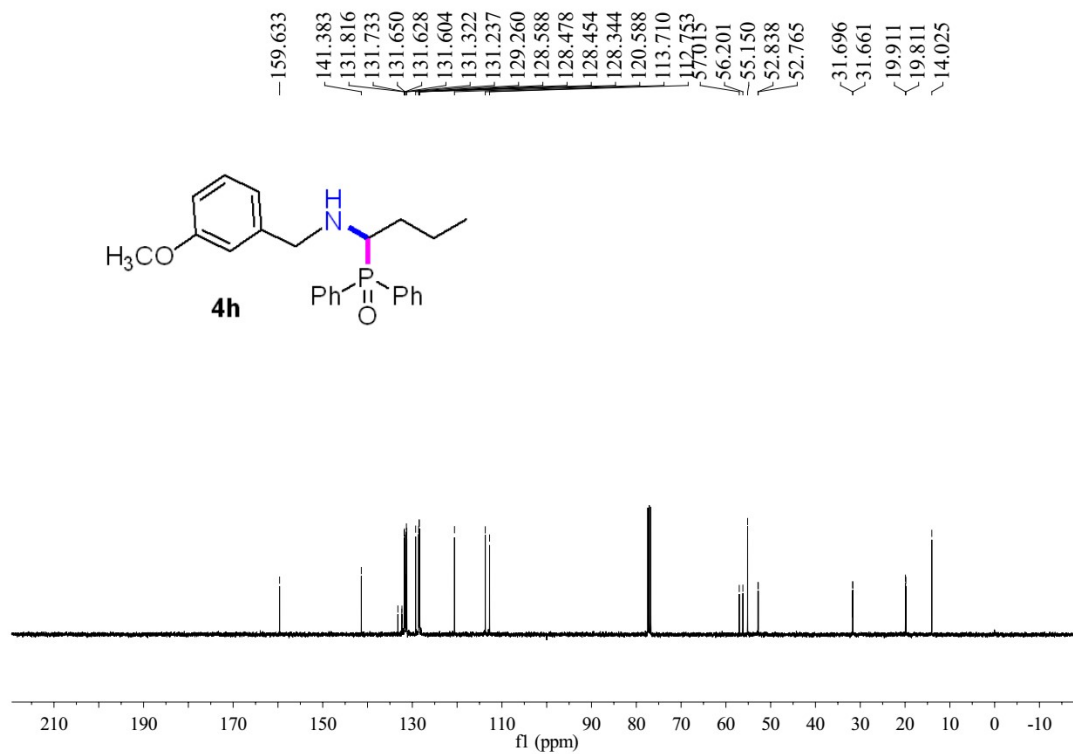

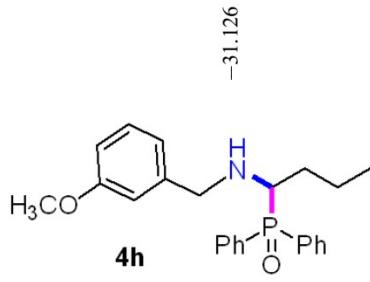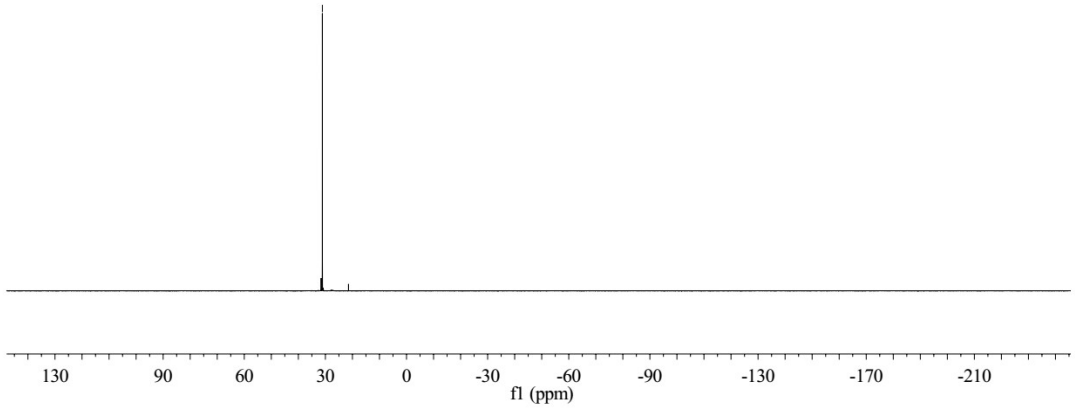

7.939  
7.922  
7.918  
7.915  
7.912  
7.895  
7.892  
7.852  
7.835  
7.831  
7.828  
7.825  
7.808  
7.805  
7.526  
7.522  
7.512  
7.508  
7.504  
7.500  
7.482  
7.478  
7.465  
7.455  
7.447  
7.340  
7.313  
7.267  
7.248  
3.803  
3.769  
3.648  
3.614  
3.447  
3.435  
3.425  
1.608  
1.595  
1.587  
1.571  
1.561  
0.850  
0.832  
0.815

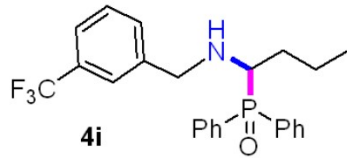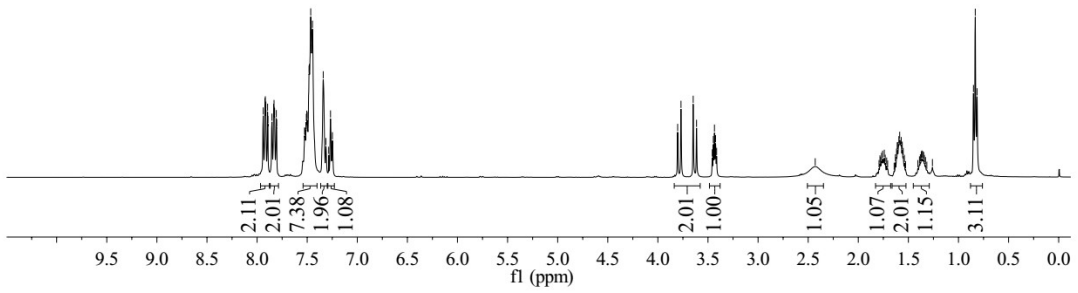

140.787  
132.743  
132.317  
131.838  
131.761  
131.531  
131.444  
131.150  
131.064  
130.661  
130.341  
128.661  
128.553  
128.454  
125.495  
124.965  
124.928  
123.894  
123.857  
122.789

56.830  
56.034  
52.099  
52.031

31.573  
31.536  
19.831  
19.730  
13.899

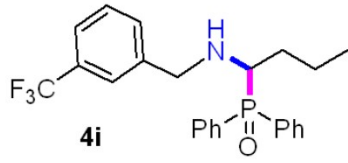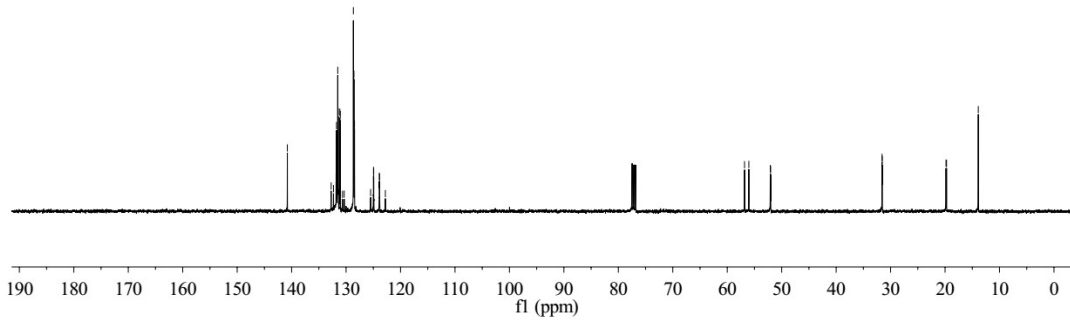

---62.514

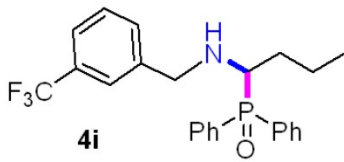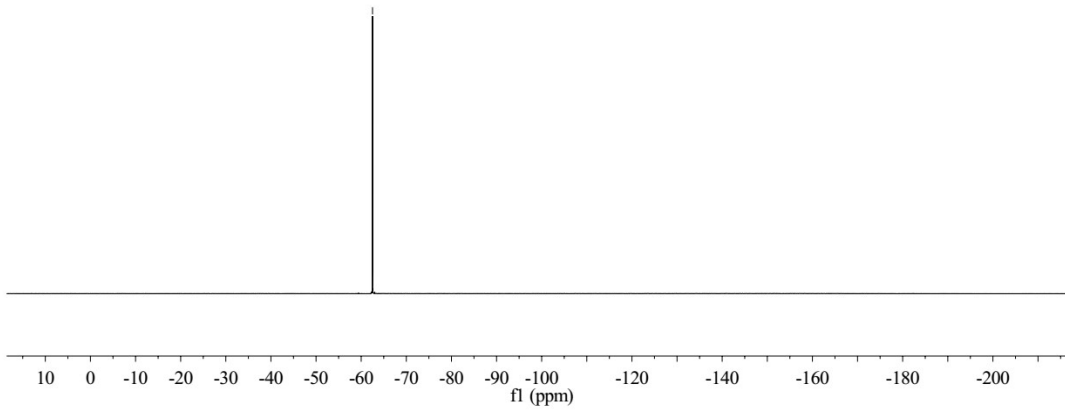

-31.665

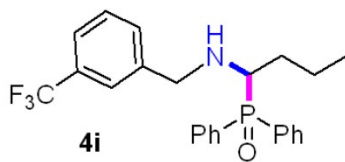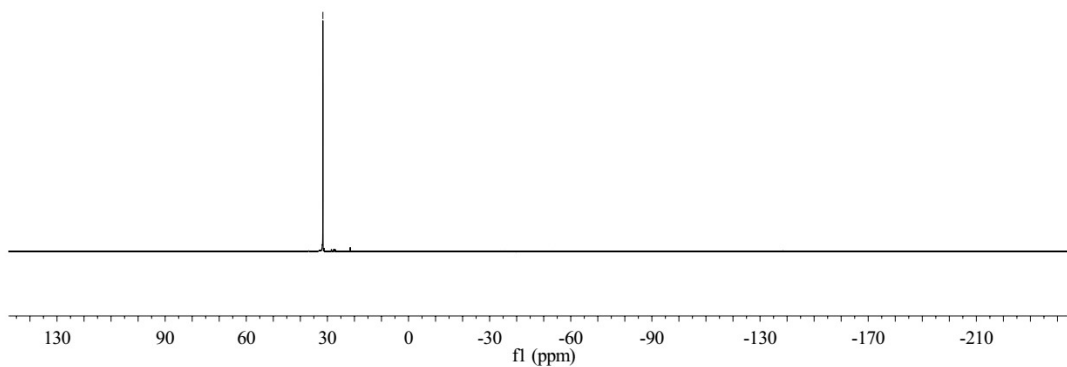

7.967  
7.950  
7.946  
7.941  
7.924  
7.920  
7.865  
7.848  
7.844  
7.842  
7.839  
7.821  
7.818  
7.818  
7.547  
7.543  
7.528  
7.525  
7.511  
7.507  
7.497  
7.490  
7.482  
7.479  
7.475  
7.471  
7.464  
7.458  
7.454  
7.288  
7.155  
7.150  
7.125  
7.111  
7.099  
7.095  
3.747  
3.716  
3.589  
3.558  
2.100  
2.070  
0.904  
0.886  
0.868

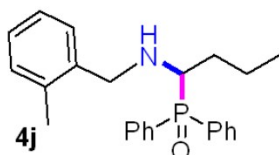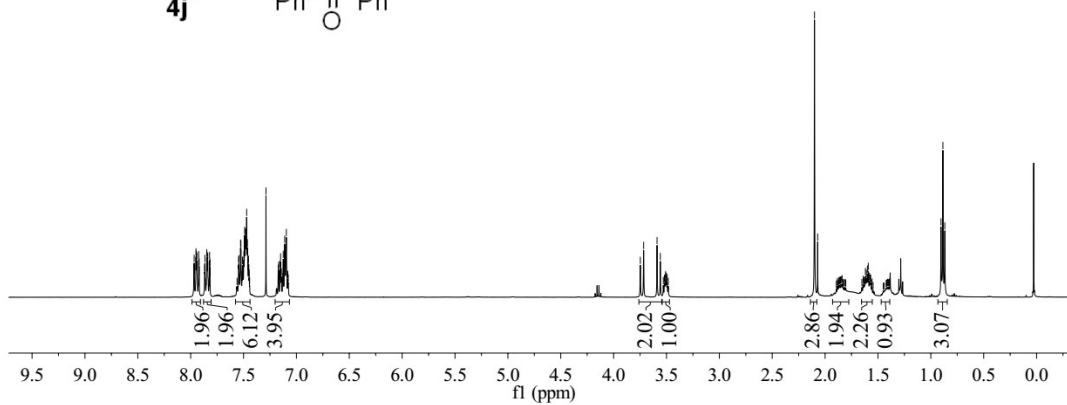



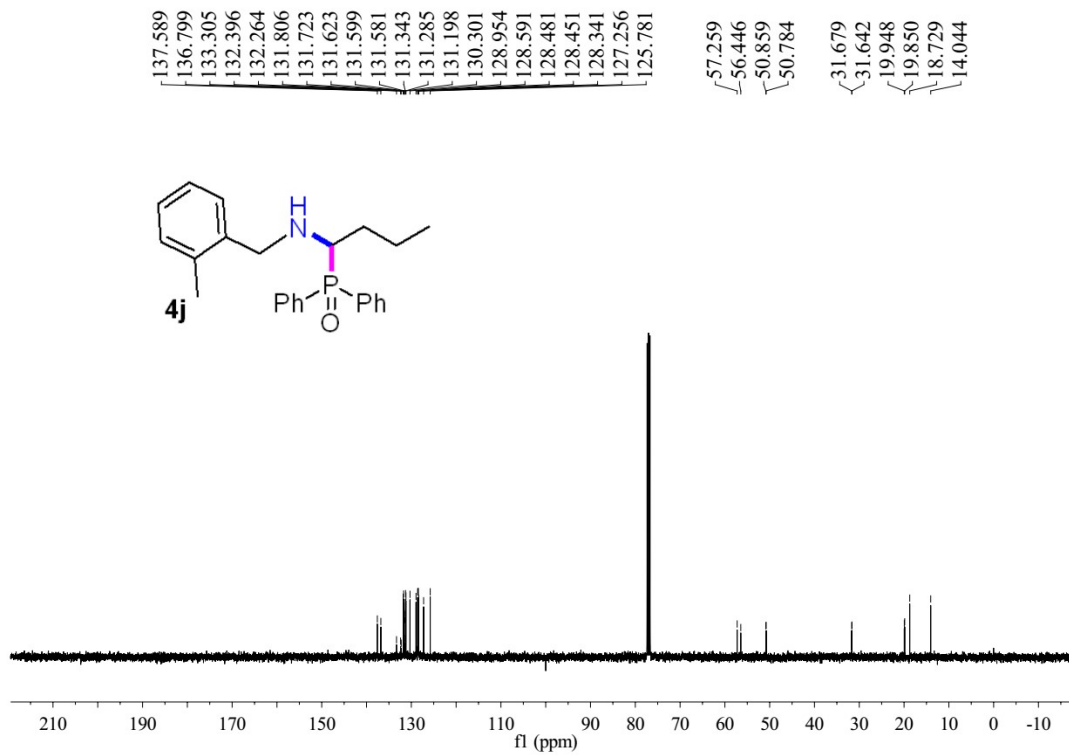

QH02-1604-16

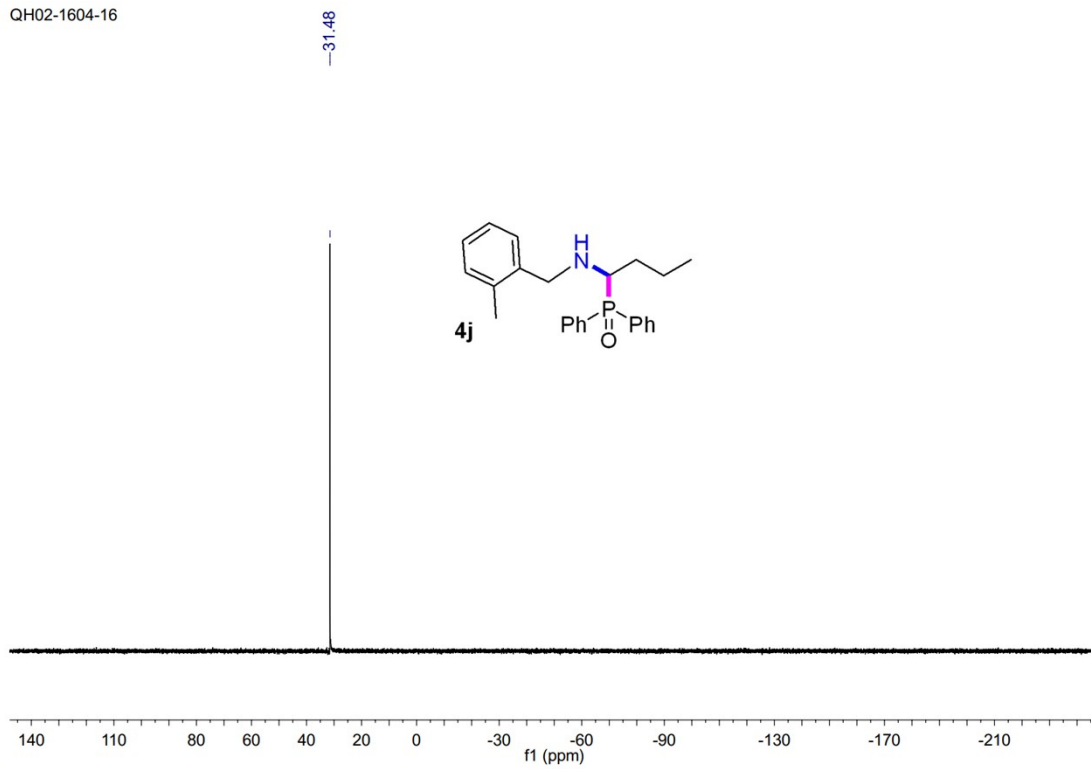

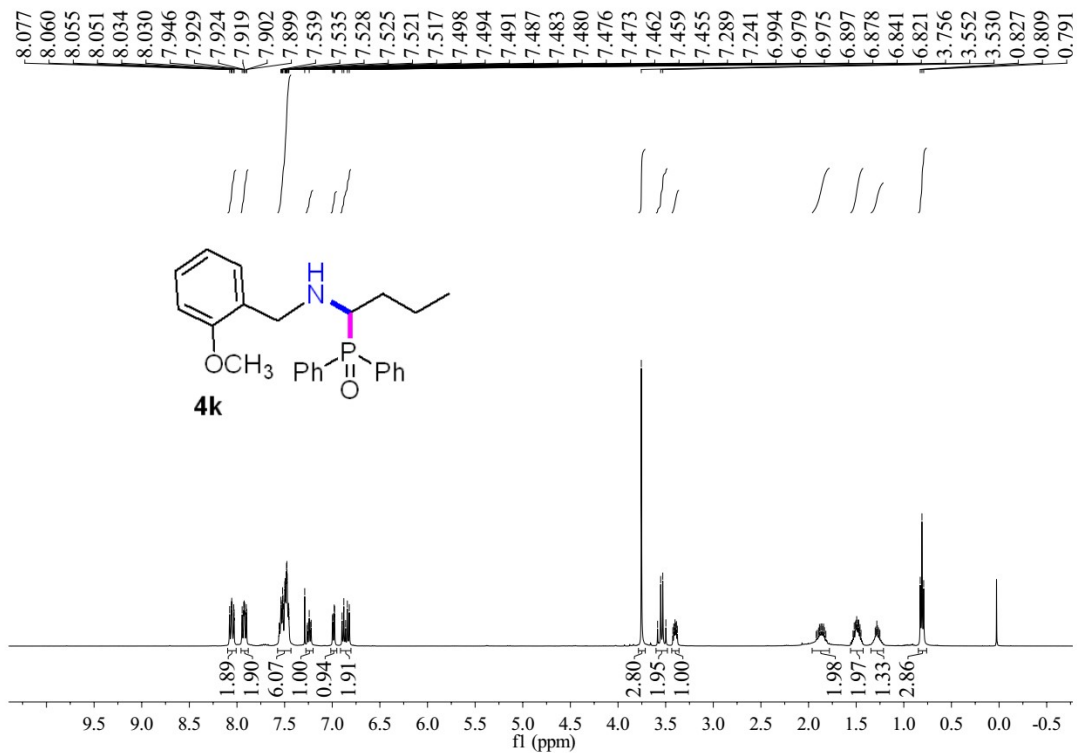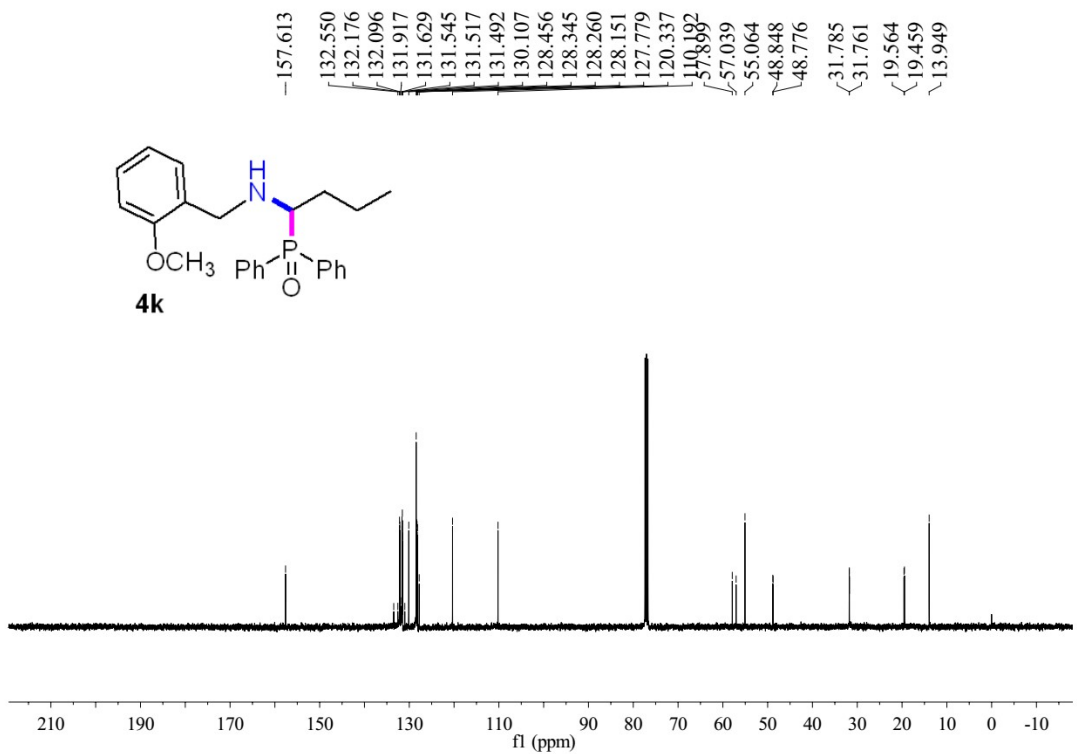

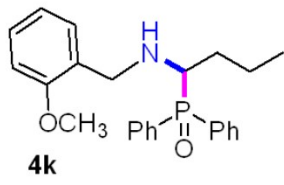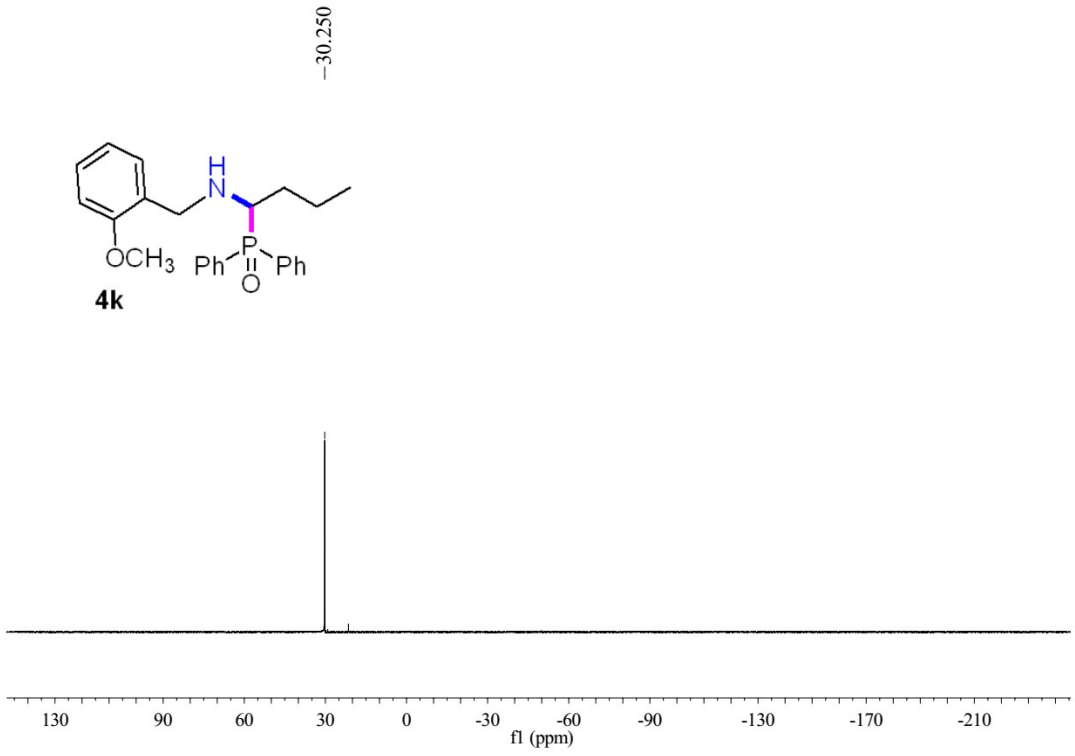

7.990  
7.987  
7.970  
7.966  
7.960  
7.943  
7.939  
7.890  
7.886  
7.870  
7.866  
7.863  
7.860  
7.843  
7.839  
7.839  
7.863  
7.563  
7.544  
7.529  
7.526  
7.511  
7.507  
7.504  
7.500  
7.496  
7.487  
7.480  
7.468  
7.466  
7.461  
7.451  
7.448  
7.444  
7.392  
7.375  
7.303  
7.285  
3.914  
3.879  
3.705  
3.670  
3.505  
0.861  
0.843  
0.825

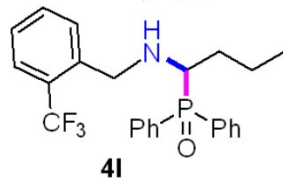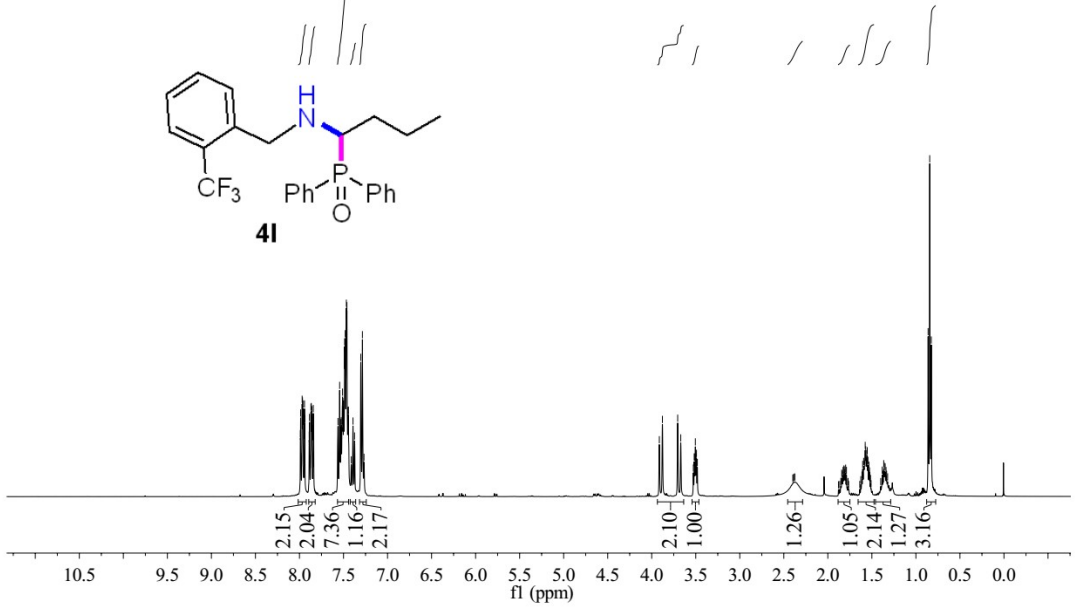

138.446  
 132.866  
 132.031  
 131.957  
 131.818  
 131.750  
 131.725  
 131.666  
 131.266  
 131.180  
 131.100  
 130.581  
 128.661  
 128.551  
 128.502  
 128.391  
 128.092  
 127.794  
 126.957  
 125.714  
 125.650  
 125.592  
 125.535  
 122.992  
 57.981  
 57.162  
 49.101  
 49.027  
 31.756  
 31.721  
 19.708  
 19.607  
 13.932

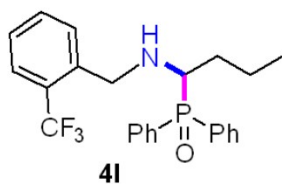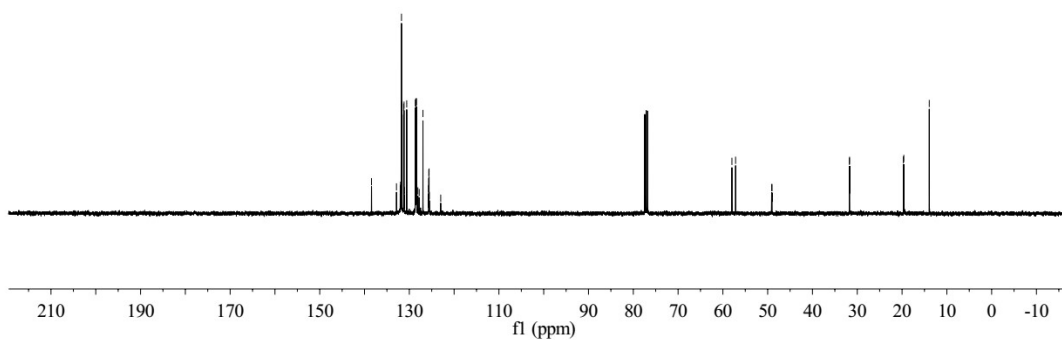

--59.416

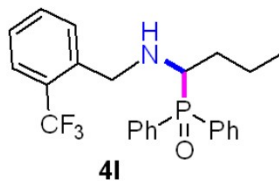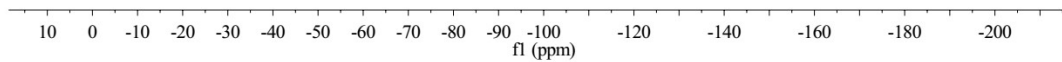

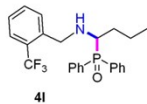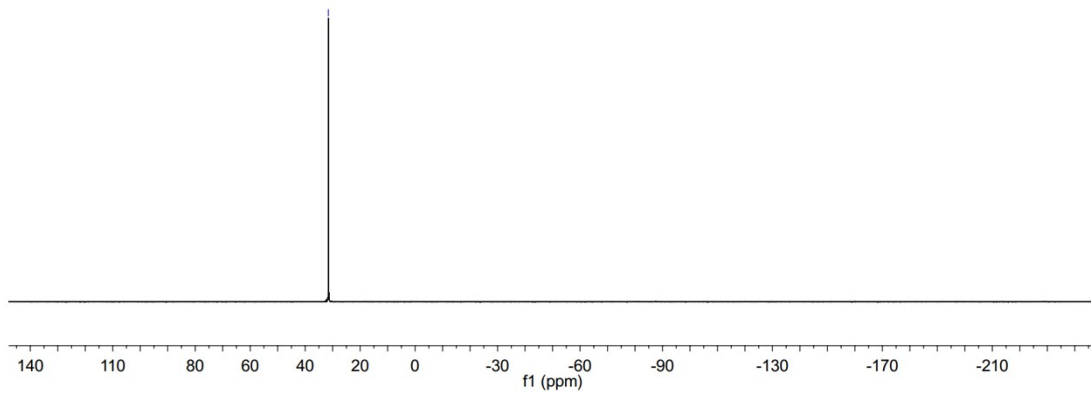

8.012  
7.995  
7.991  
7.986  
7.969  
7.966  
7.904  
7.887  
7.883  
7.877  
7.860  
7.857  
7.857  
7.546  
7.543  
7.528  
7.514  
7.510  
7.505  
7.498  
7.490  
7.487  
7.479  
7.472  
7.462  
7.458  
7.337  
7.334  
7.284  
6.298  
6.293  
6.290  
6.286  
6.050  
6.043  
3.634  
3.597  
3.509  
3.473  
1.473  
1.465  
1.273  
0.852  
0.814  
0.796

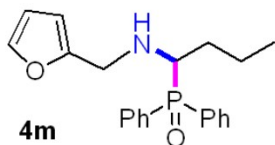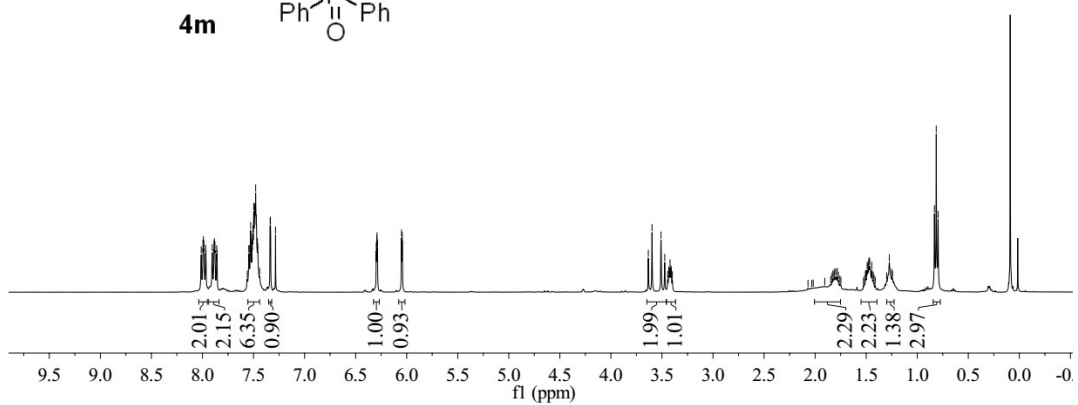

-153.149  
~141.909  
131.944  
131.863  
128.562  
128.452  
118.417  
~107.539

56.701  
55.863  
45.152  
45.082  
31.797  
31.769  
19.656  
19.553  
13.921

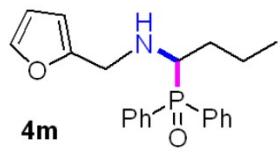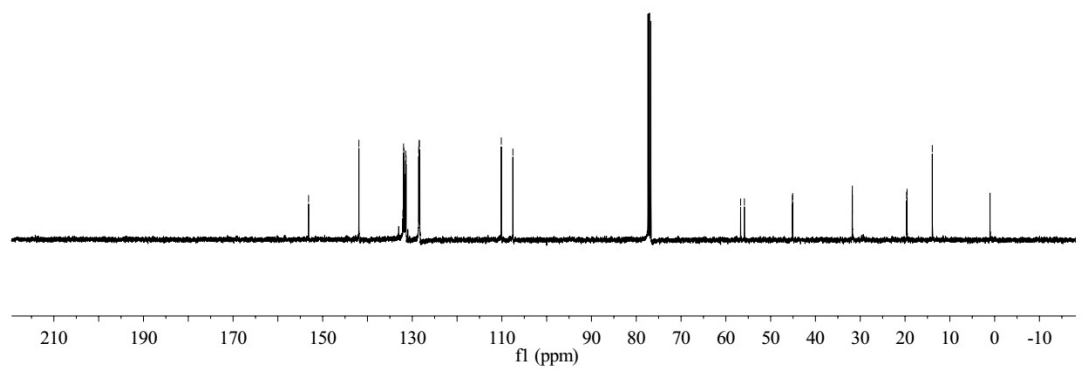

-30.407

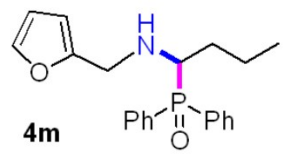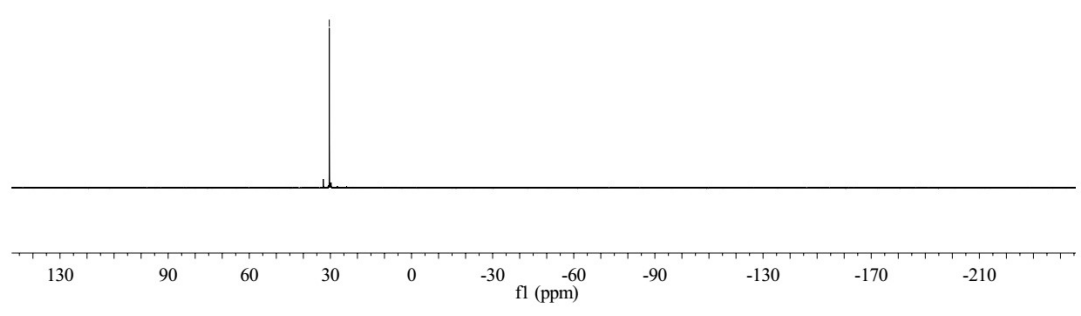

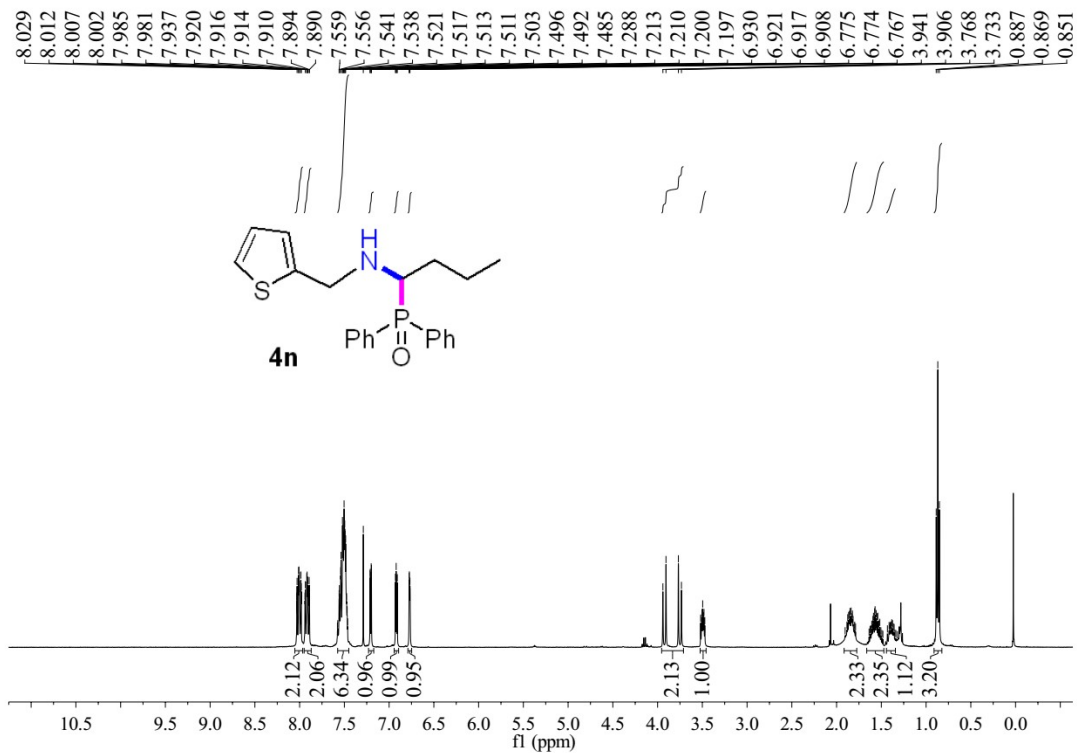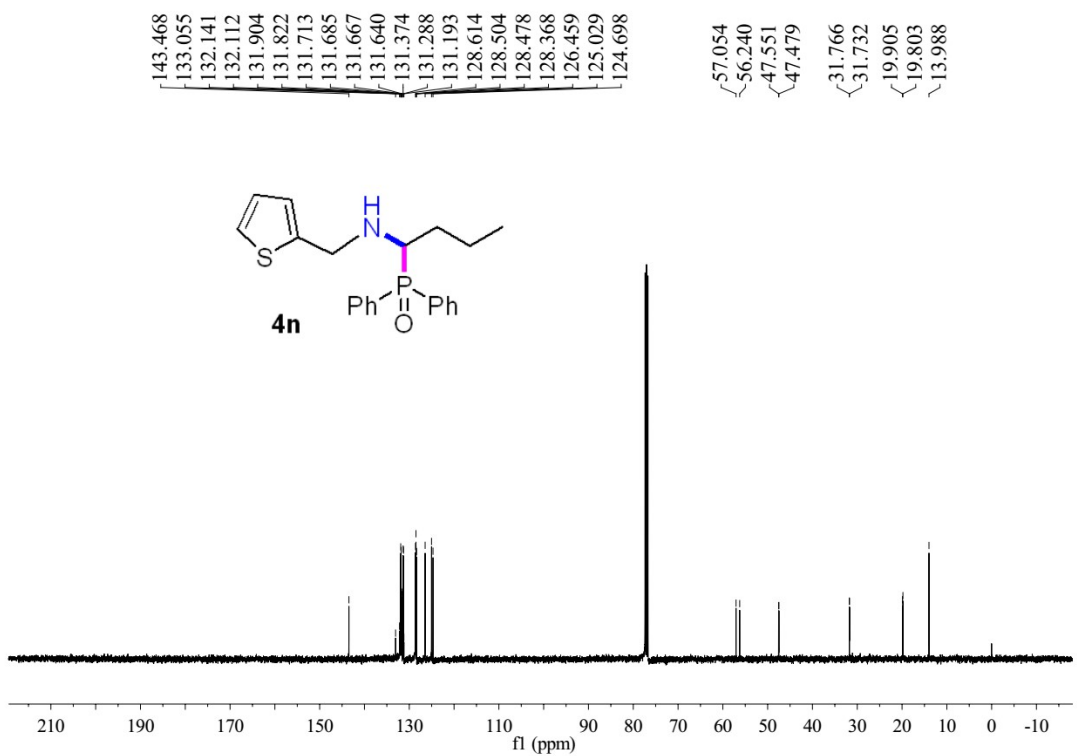

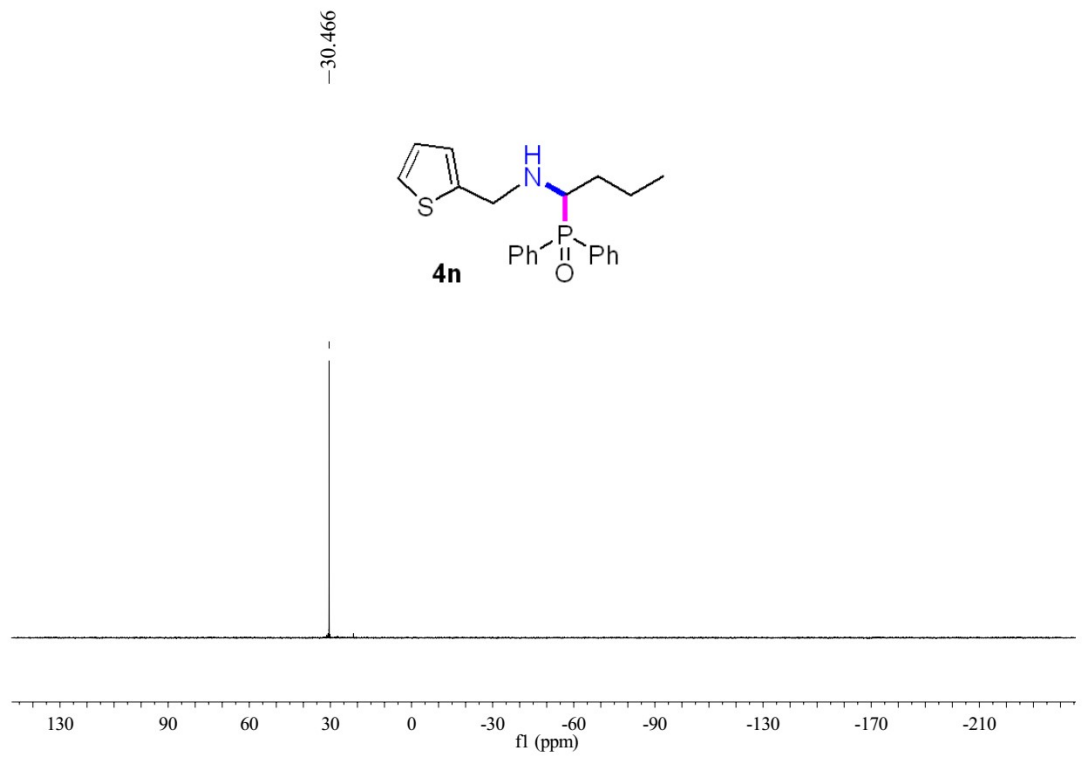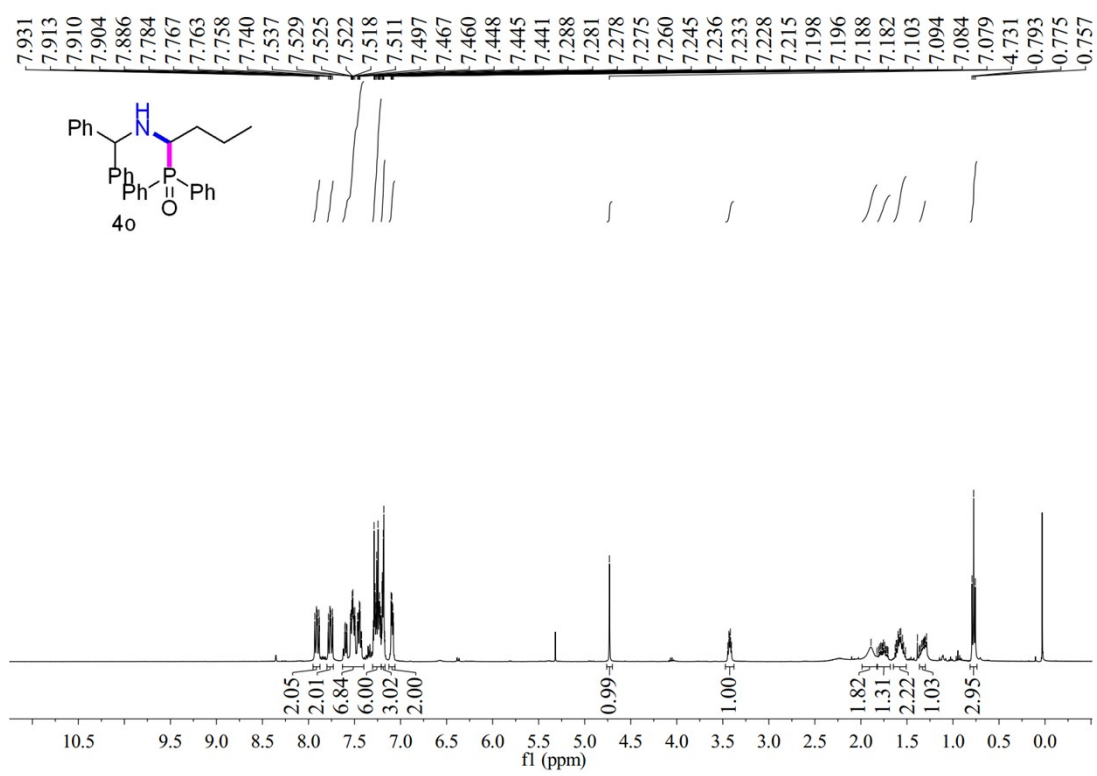



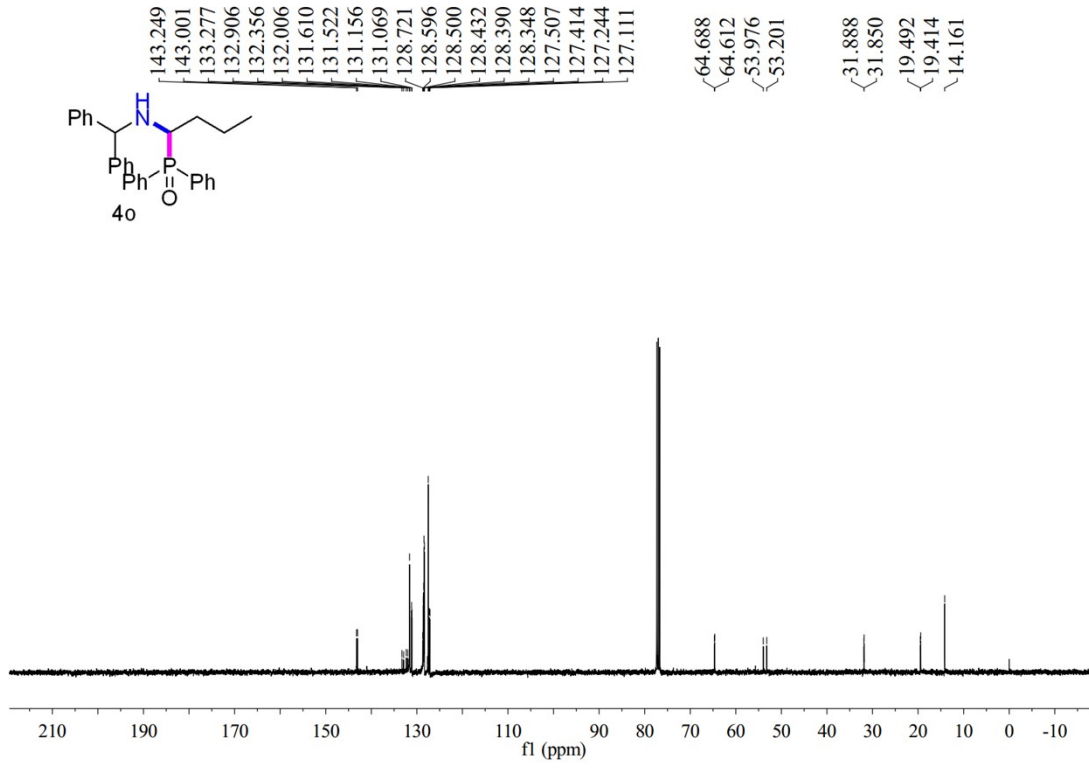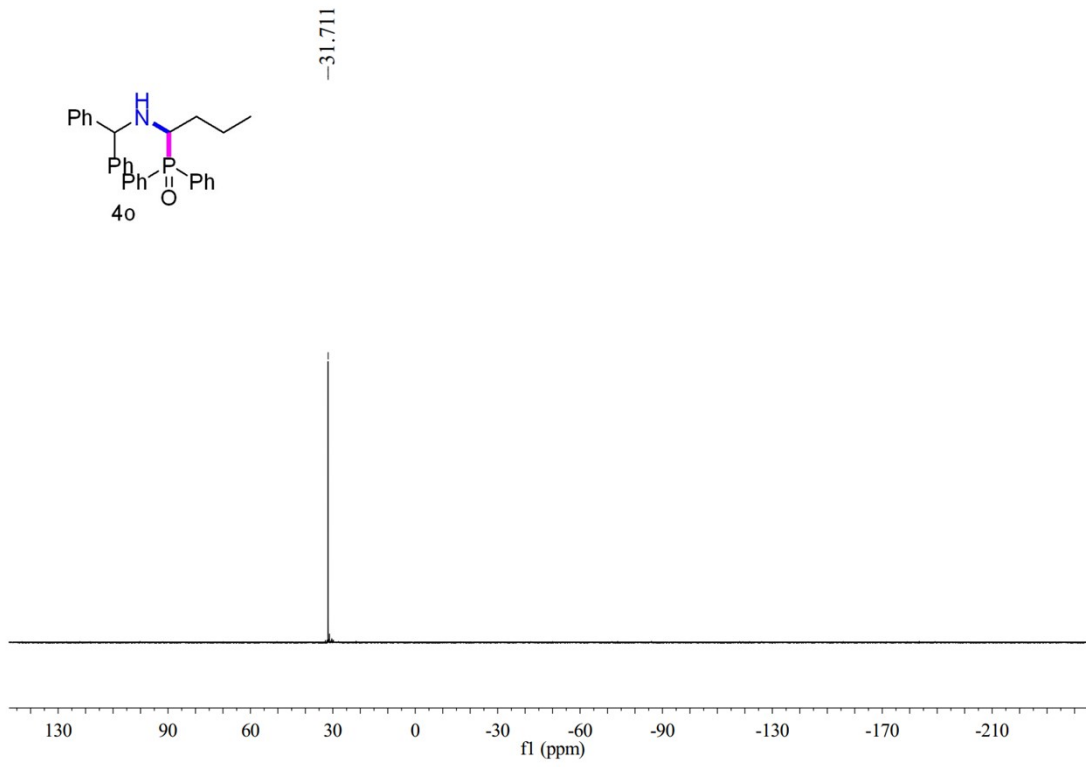

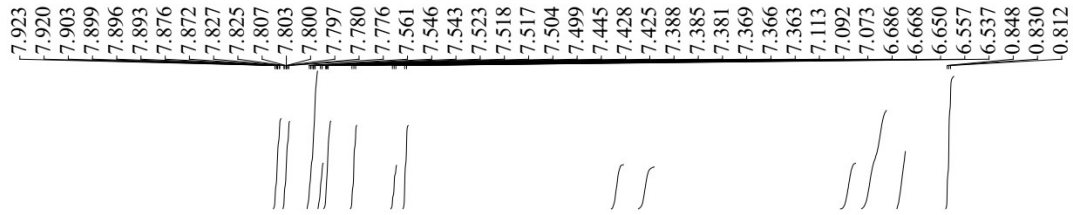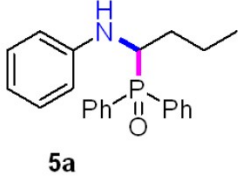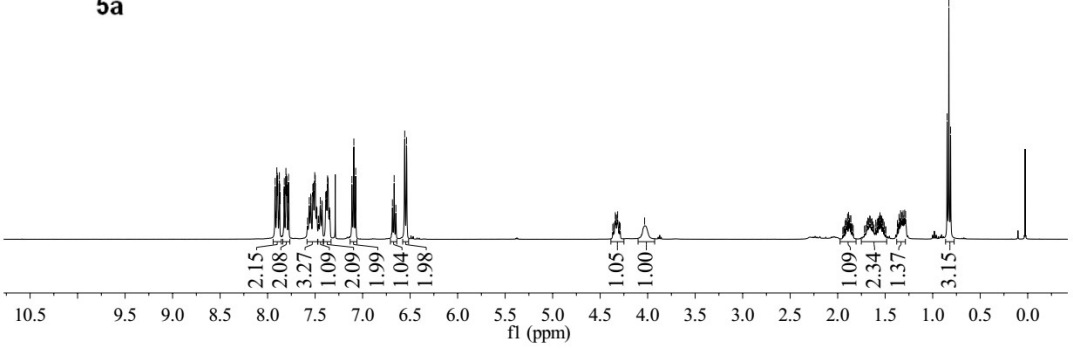

- 147.275
- 147.208
- 131.395
- 131.311
- 129.227
- 128.474
- 113.221
- 77.381
- 77.063
- 76.745
- 52.969
- 52.170
- 32.588
- 32.547
- 19.699
- 19.598
- 13.981

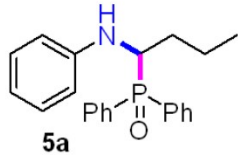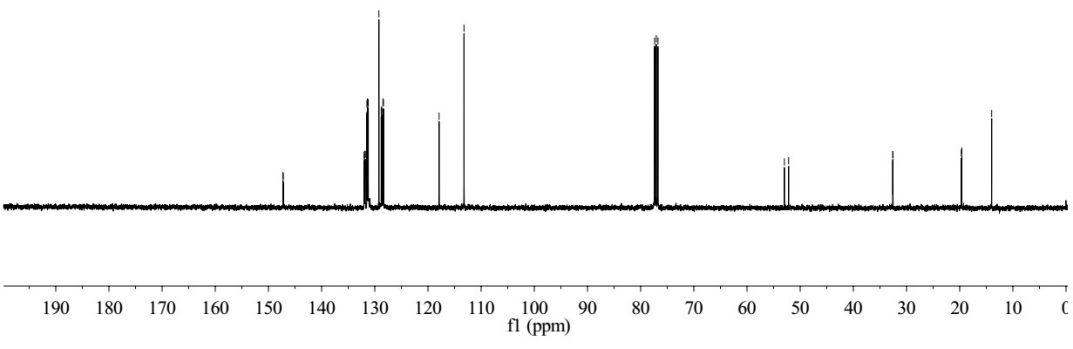

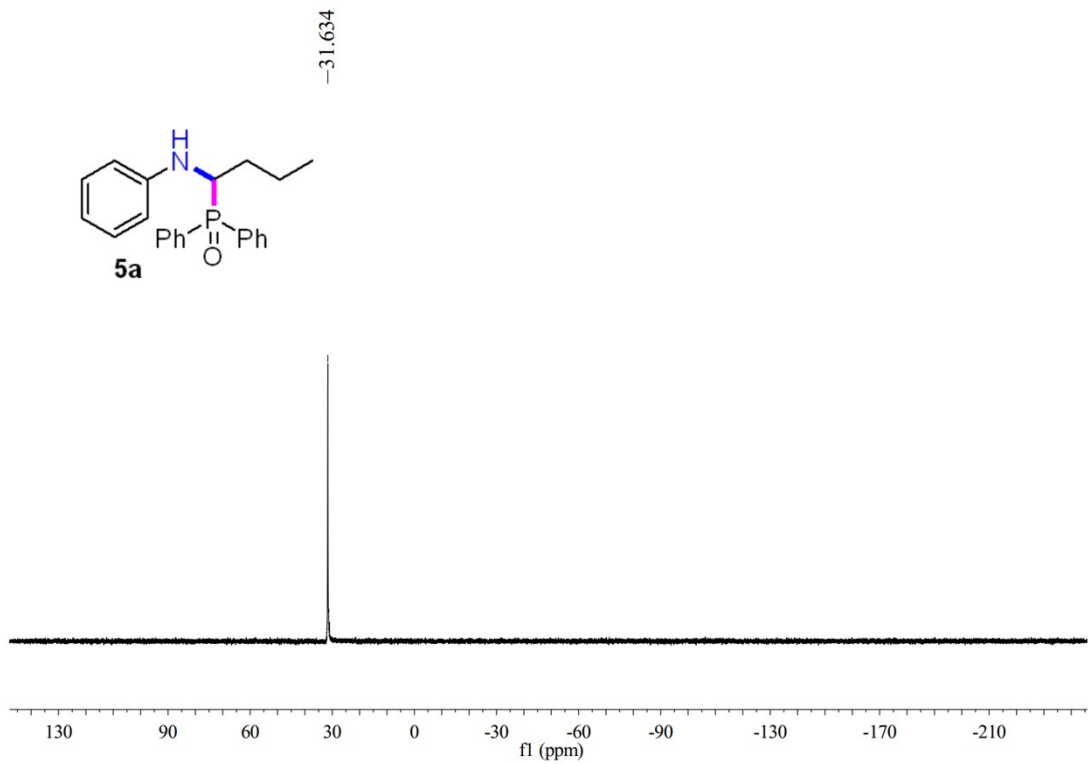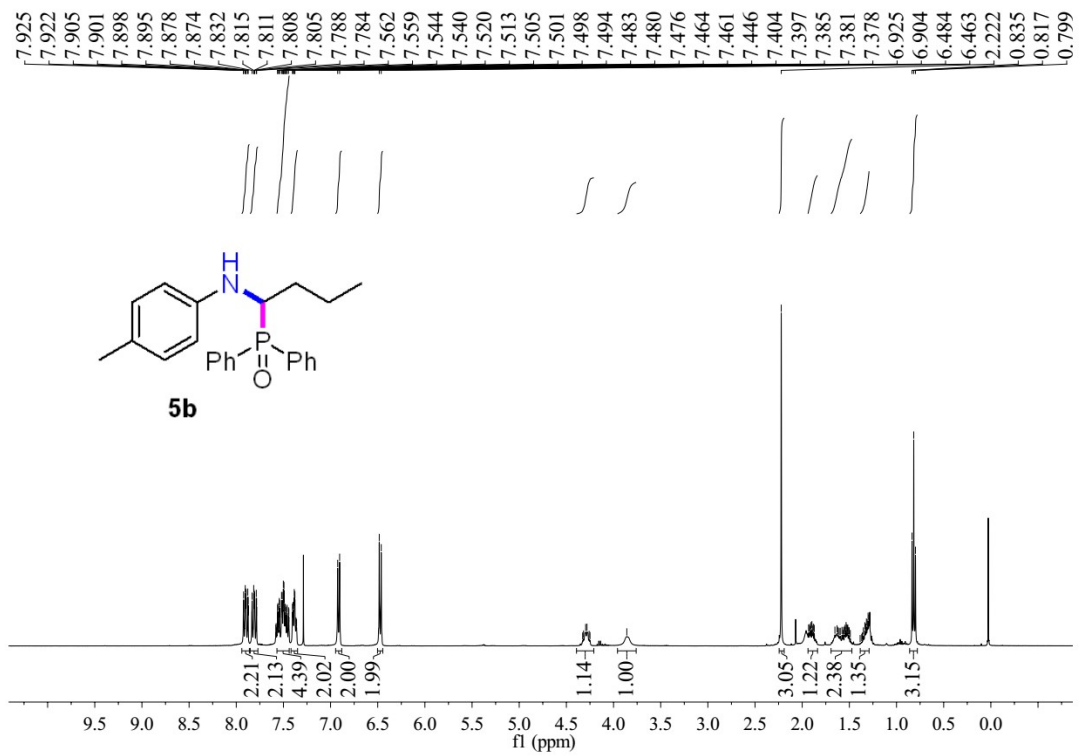

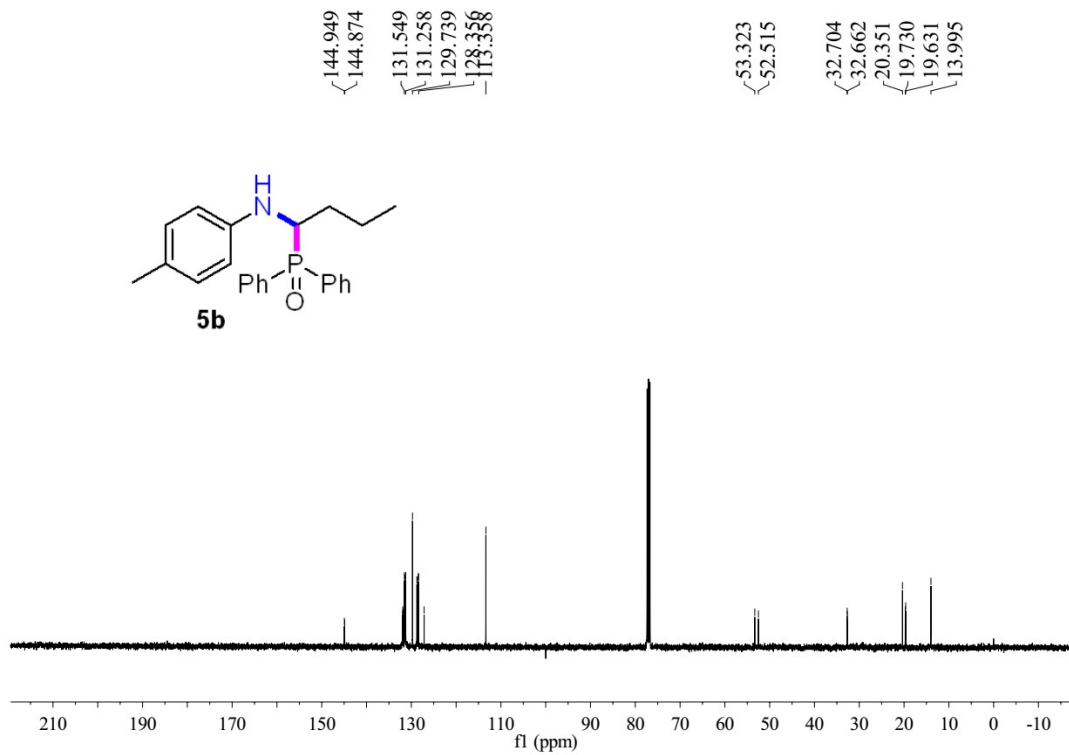

QH02-1625-2

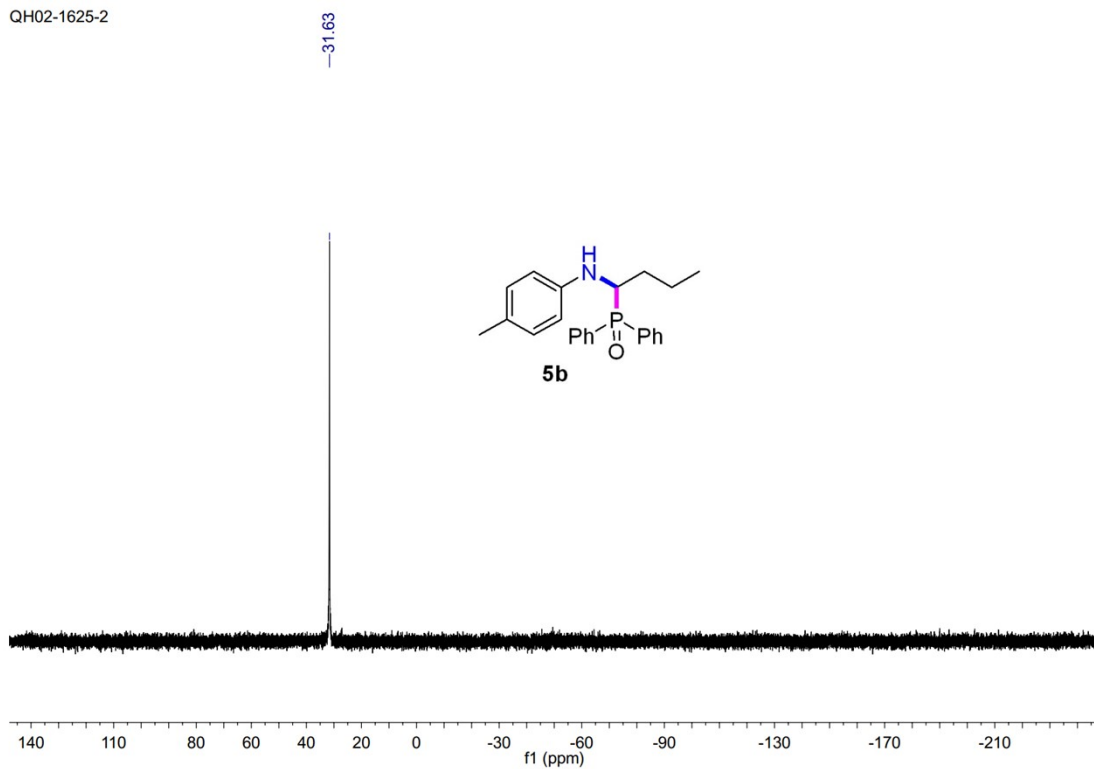

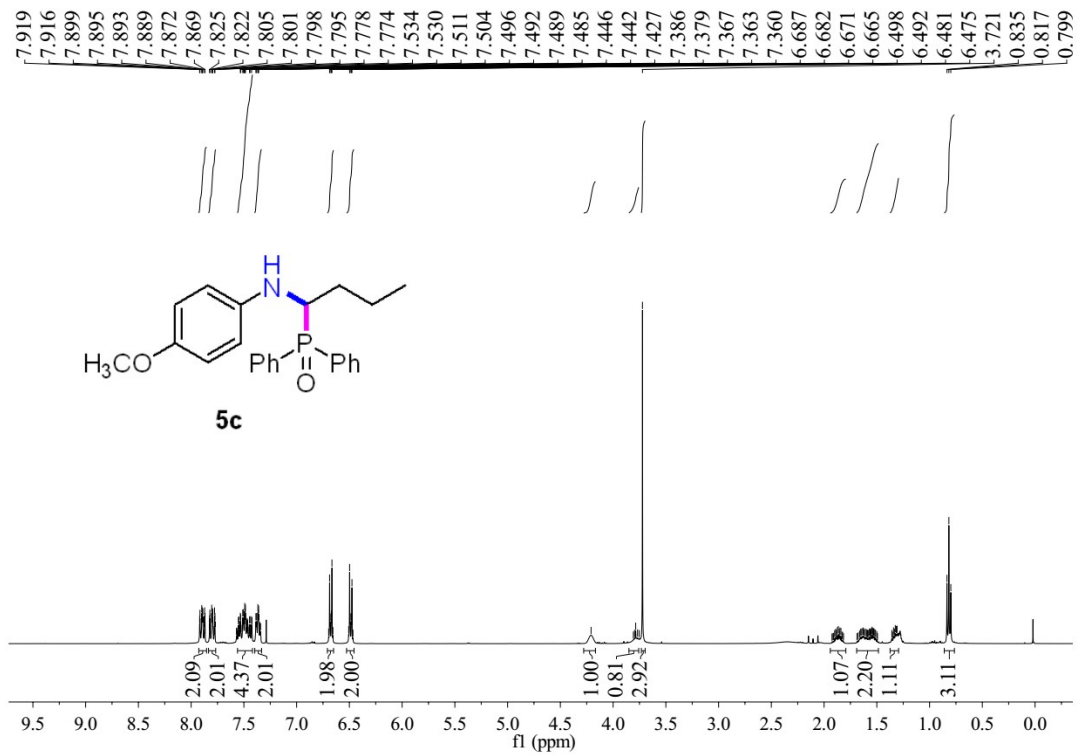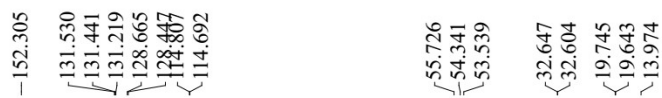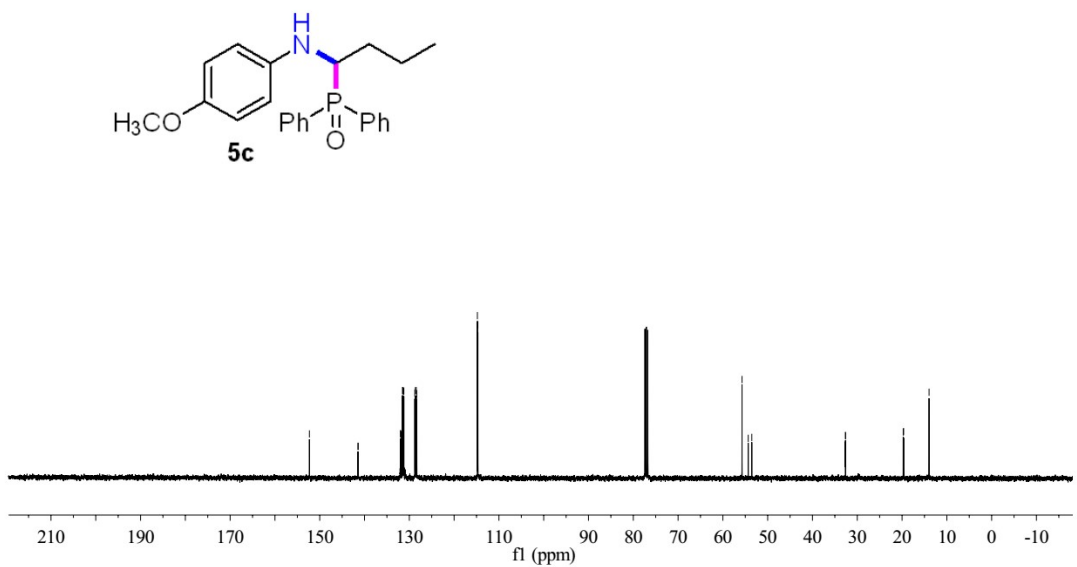

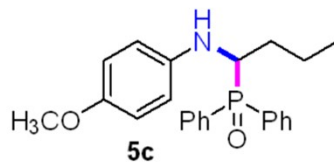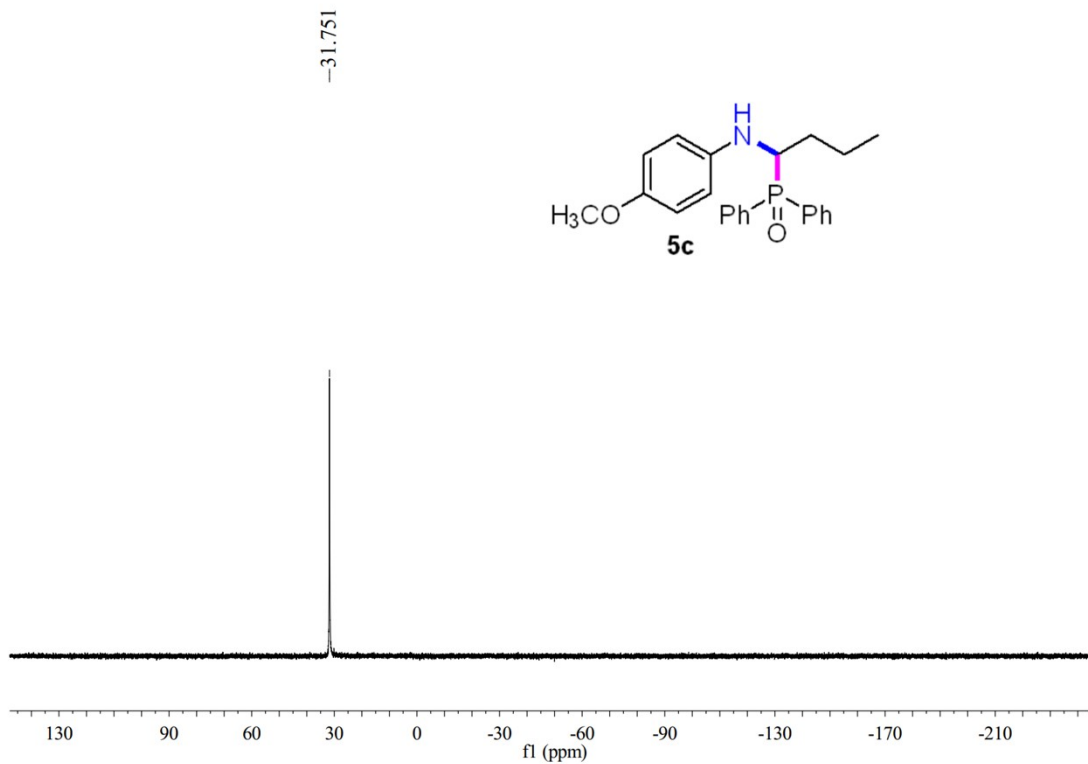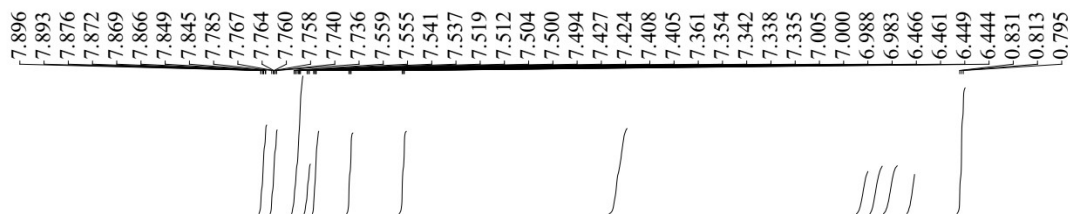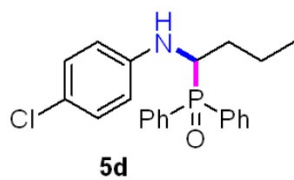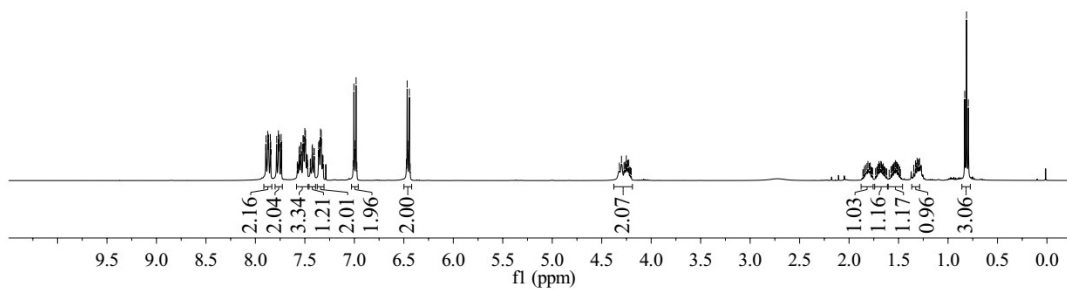

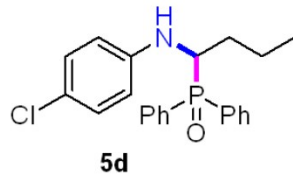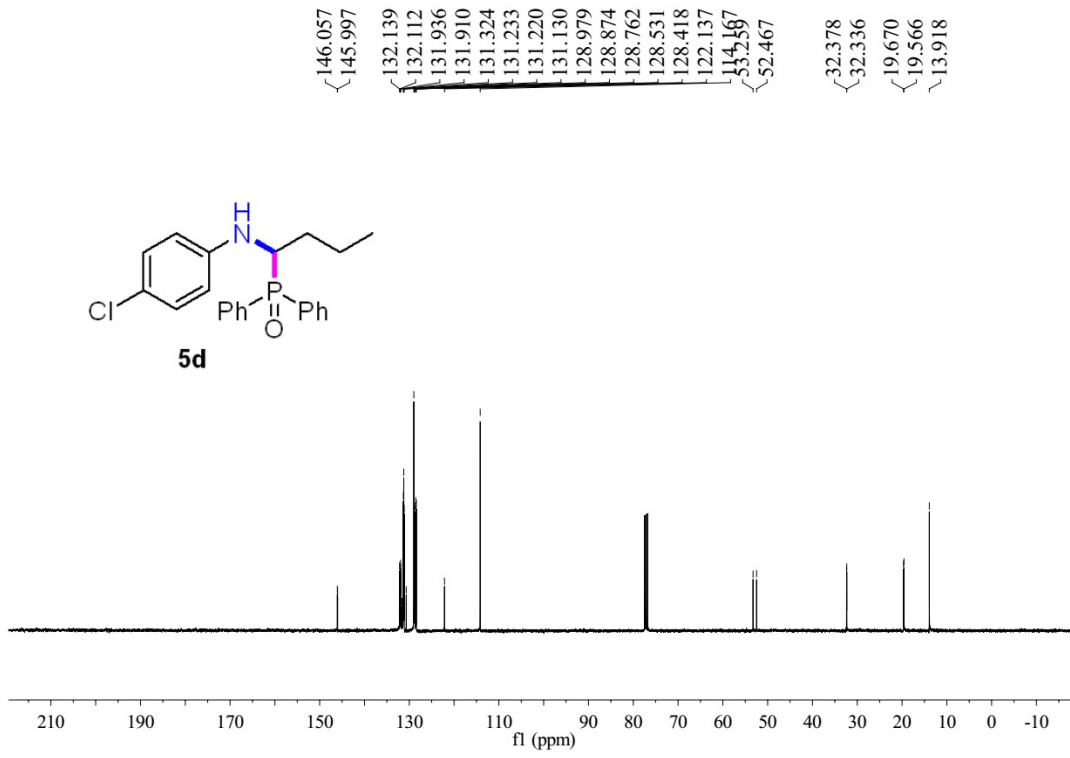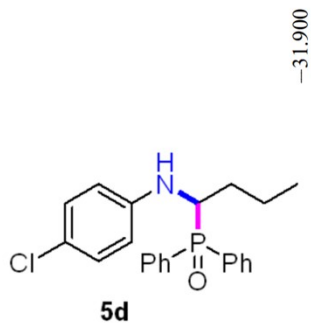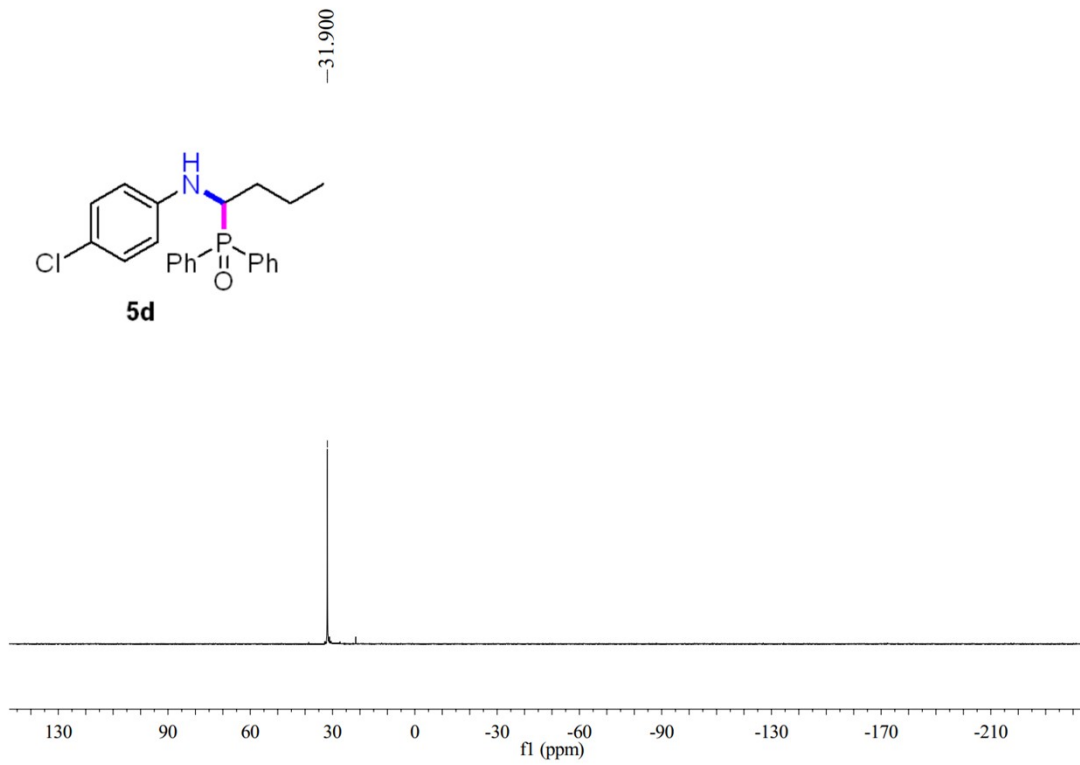

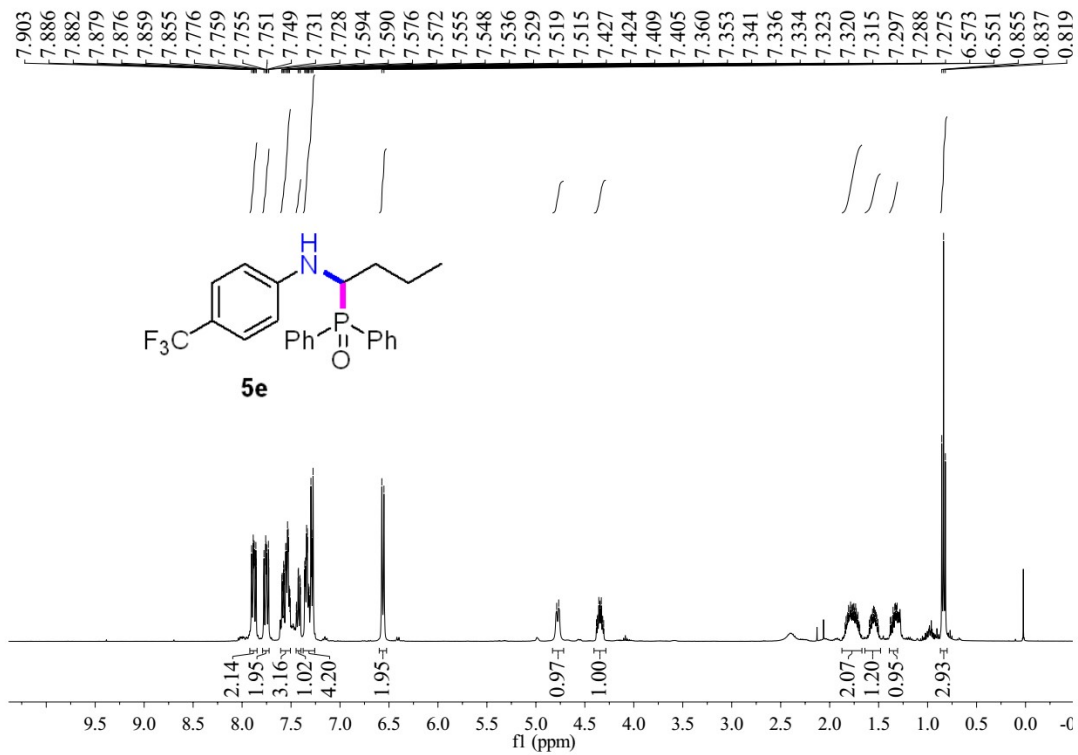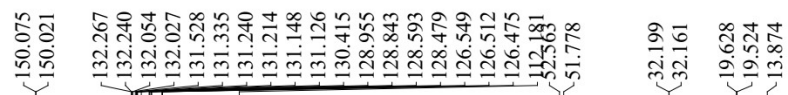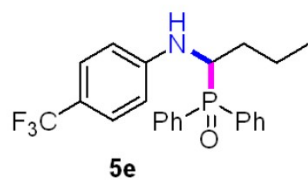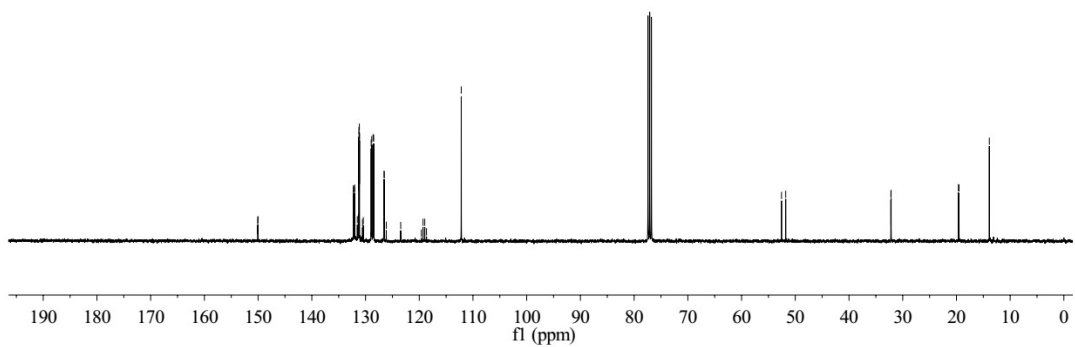



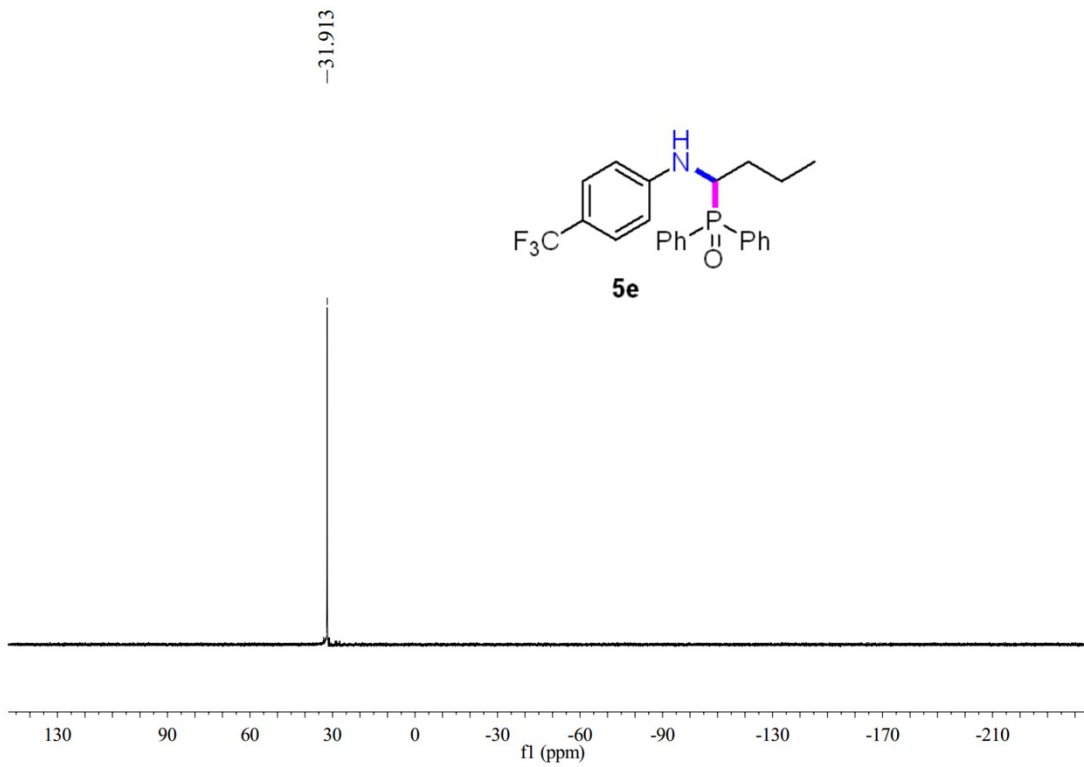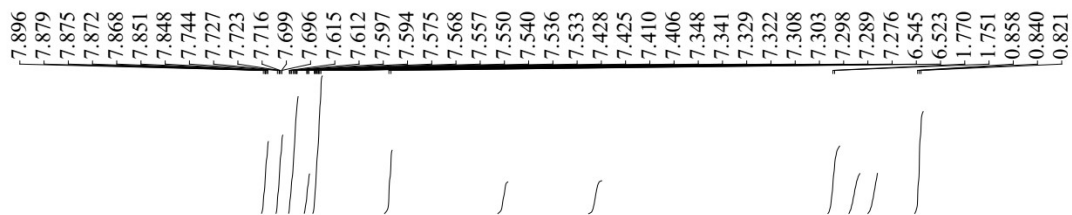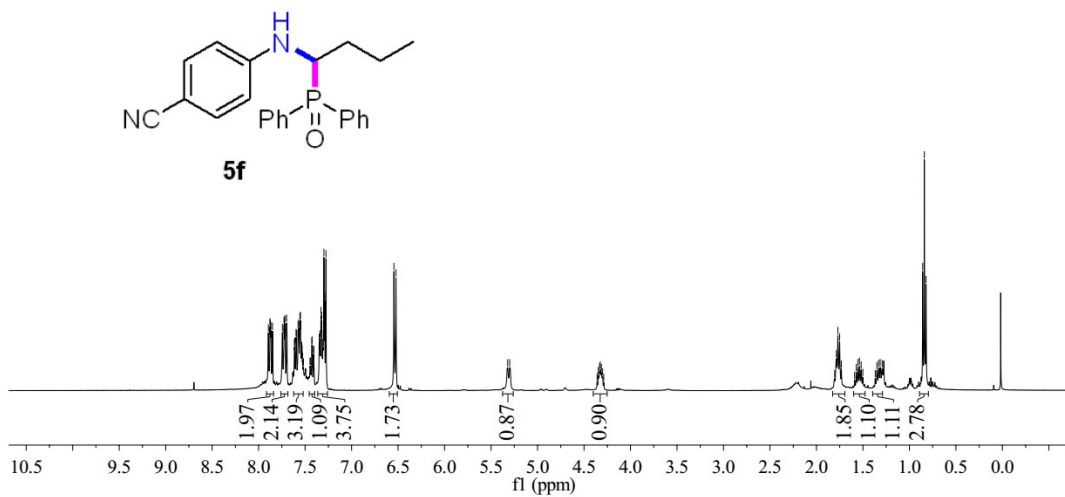

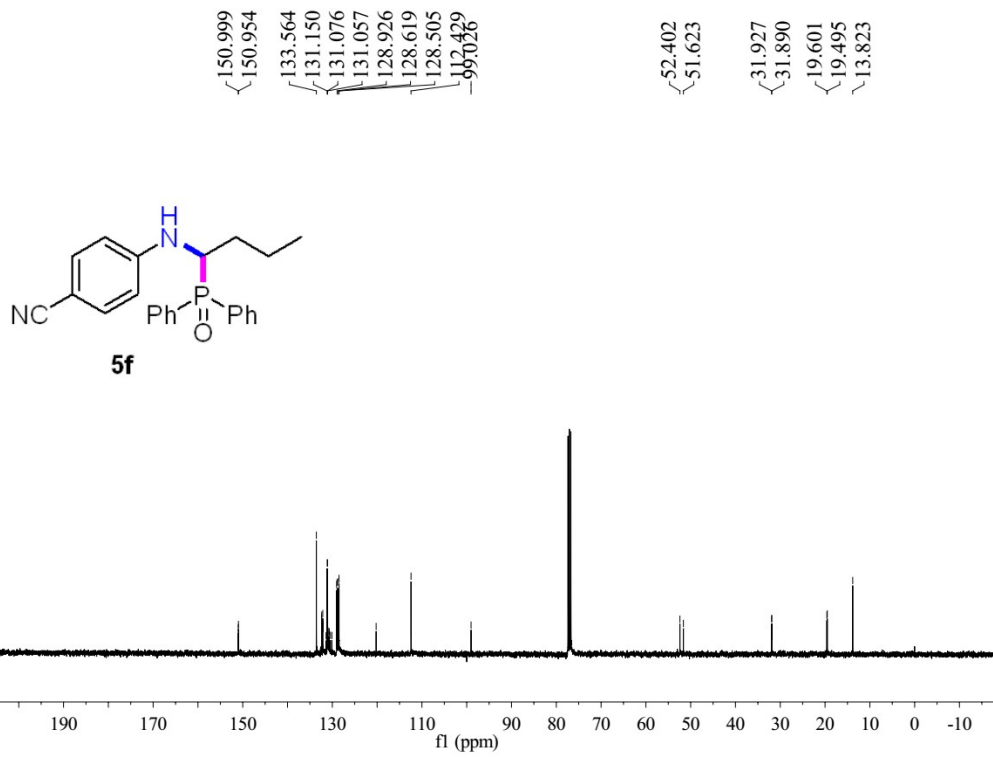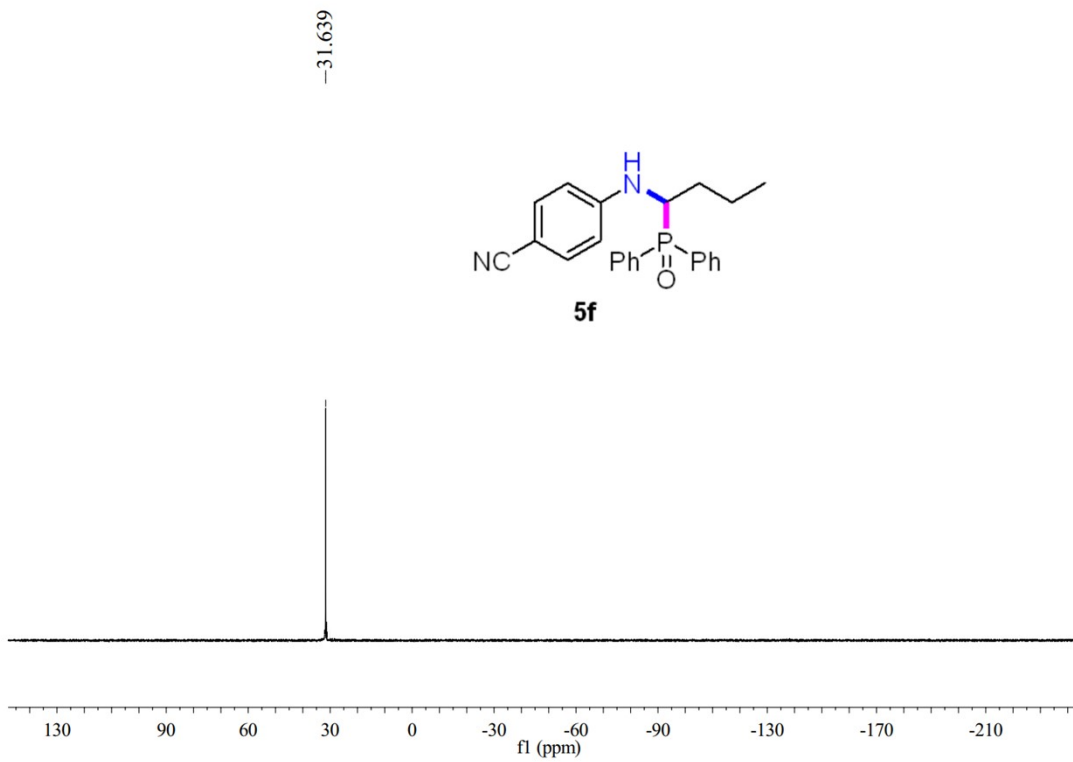

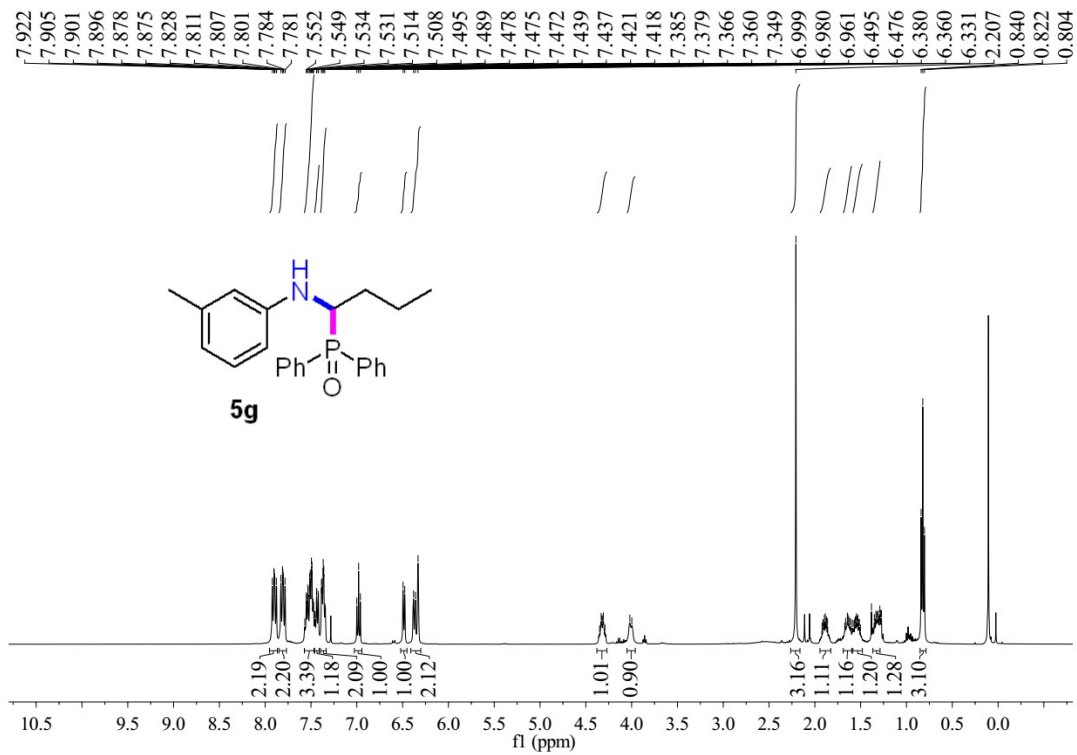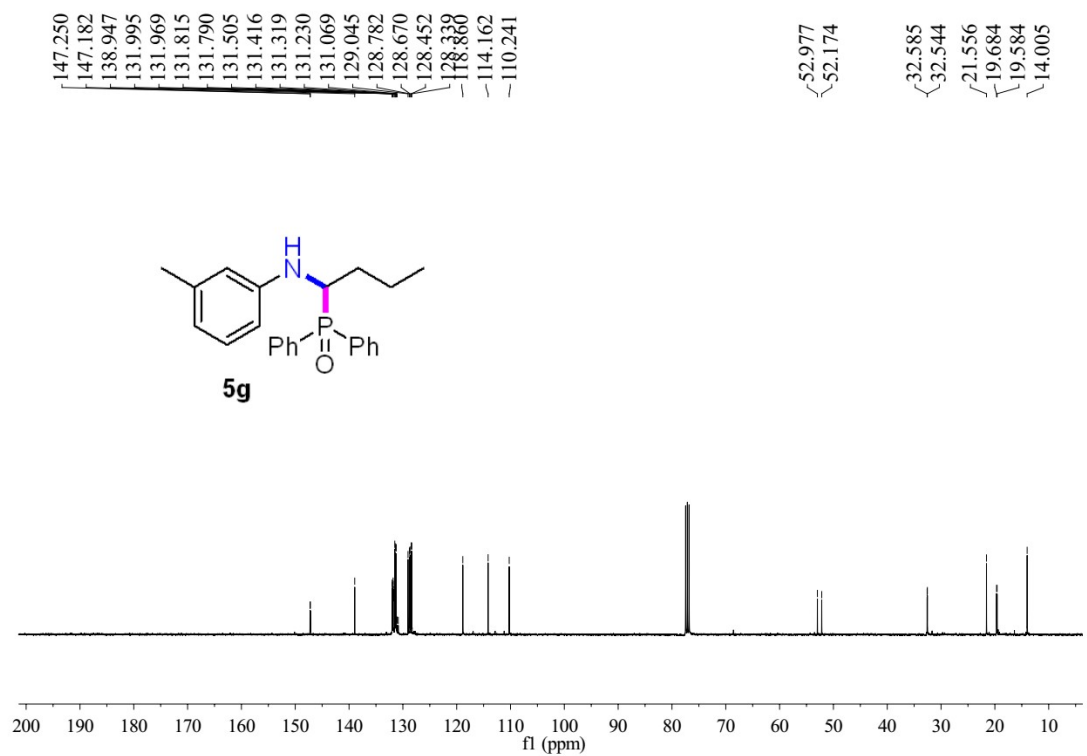

-31.744

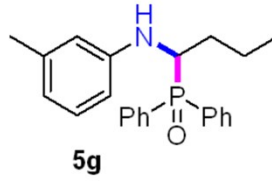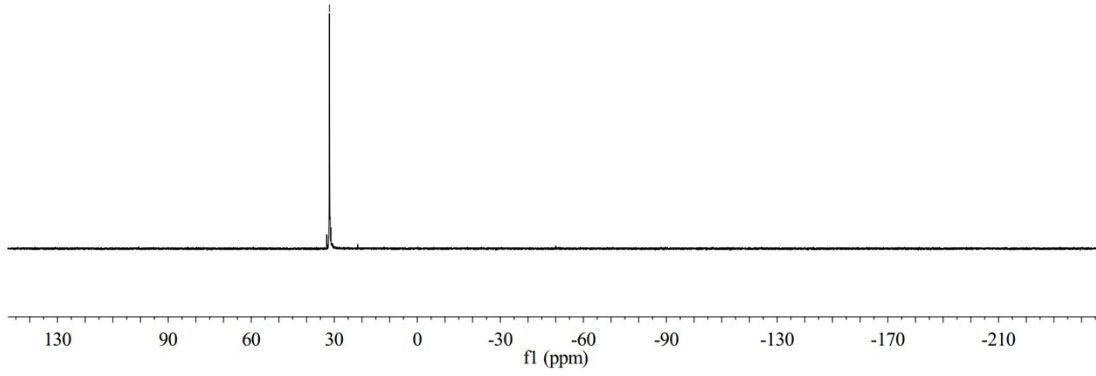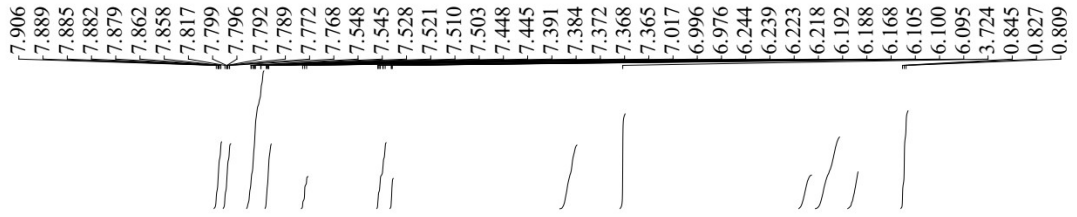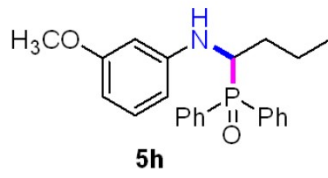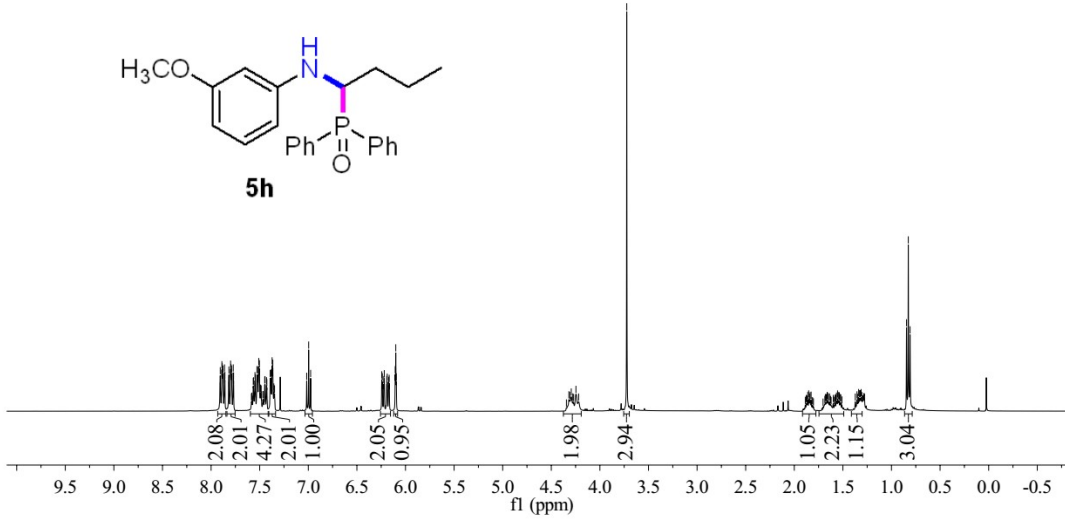

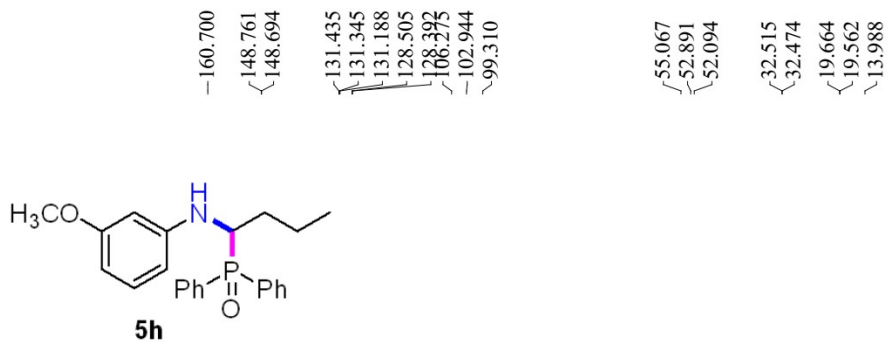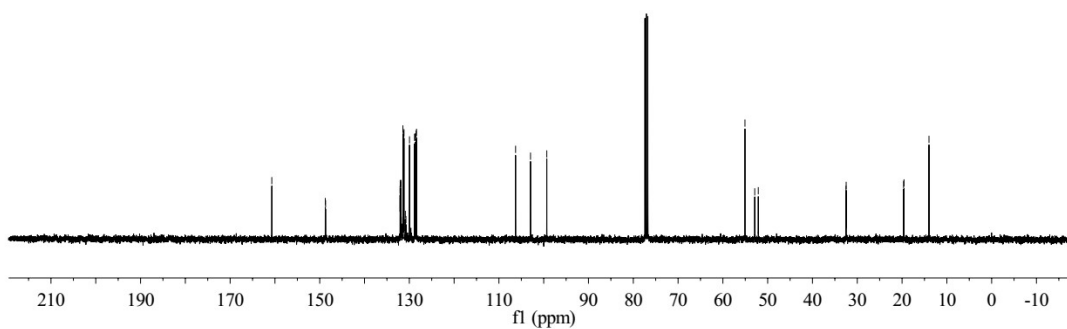

$-\text{32.251}$

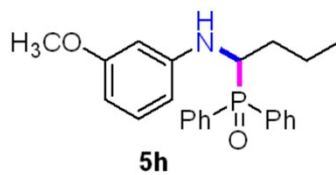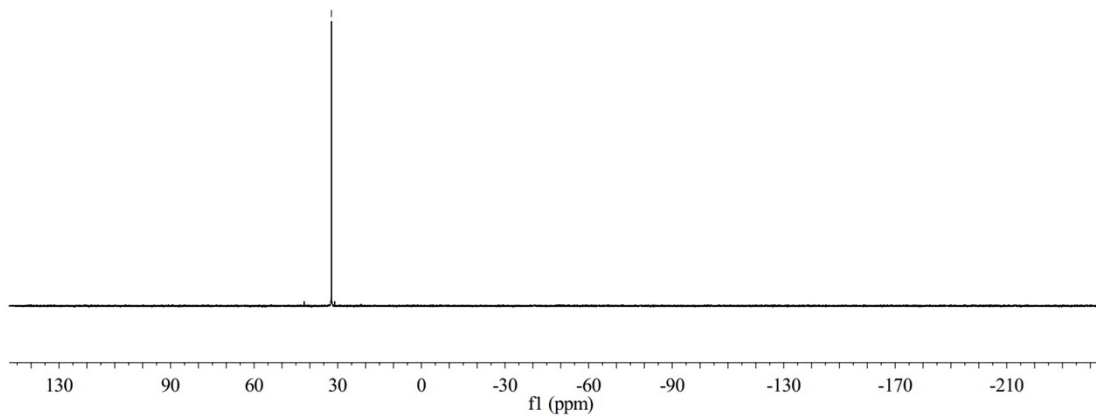

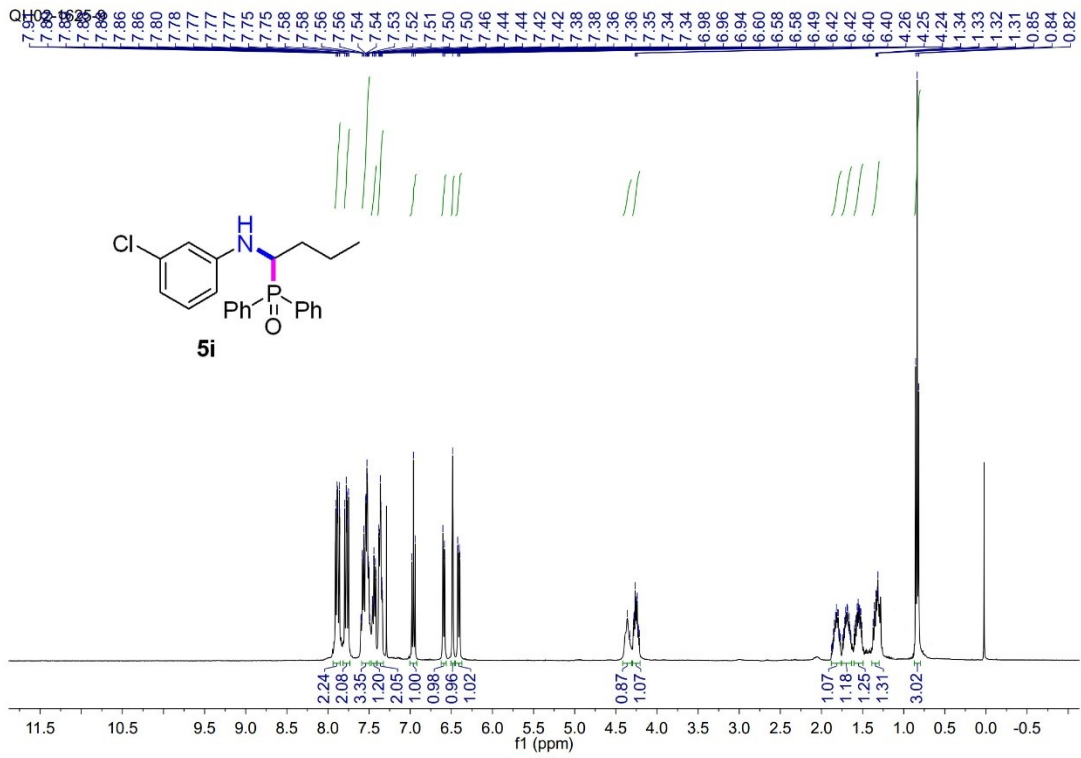

QH02-1625-9

148.54  
148.49  
131.32  
128.89  
128.78  
112.68  
111.49

52.93  
52.14

32.26  
32.22

19.64  
19.53  
13.93

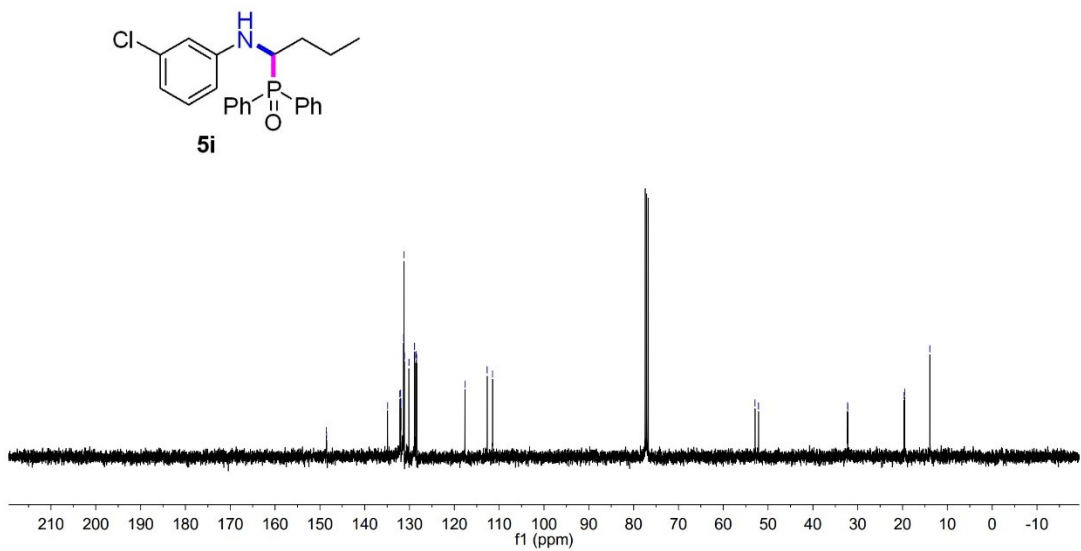

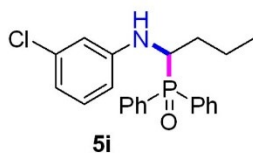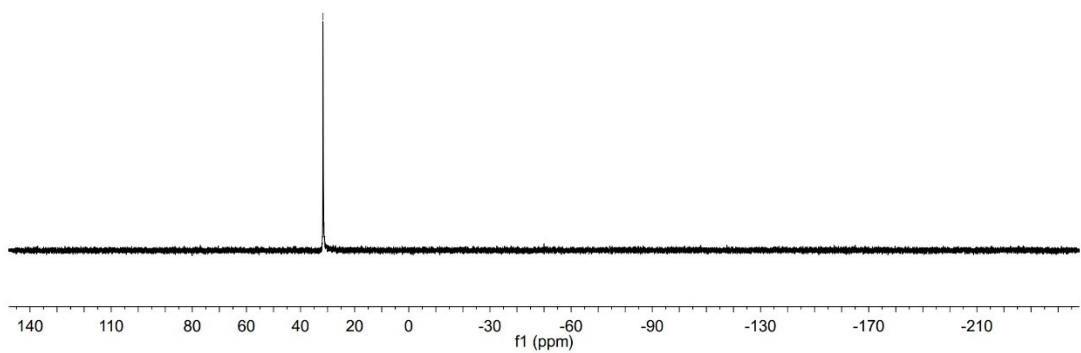

7.912  
7.895  
7.891  
7.886  
7.868  
7.865  
7.807  
7.789  
7.786  
7.780  
7.762  
7.759  
7.566  
7.563  
7.549  
7.545  
7.524  
7.518  
7.505  
7.499  
7.488  
7.485  
7.481  
7.445  
7.430  
7.427  
7.380  
7.373  
7.360  
7.354  
7.343  
7.335  
7.036  
7.016  
6.985  
6.967  
6.636  
6.617  
6.606  
6.586  
2.026  
0.862  
0.844  
0.826

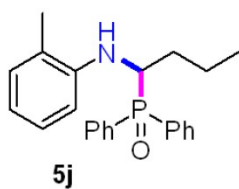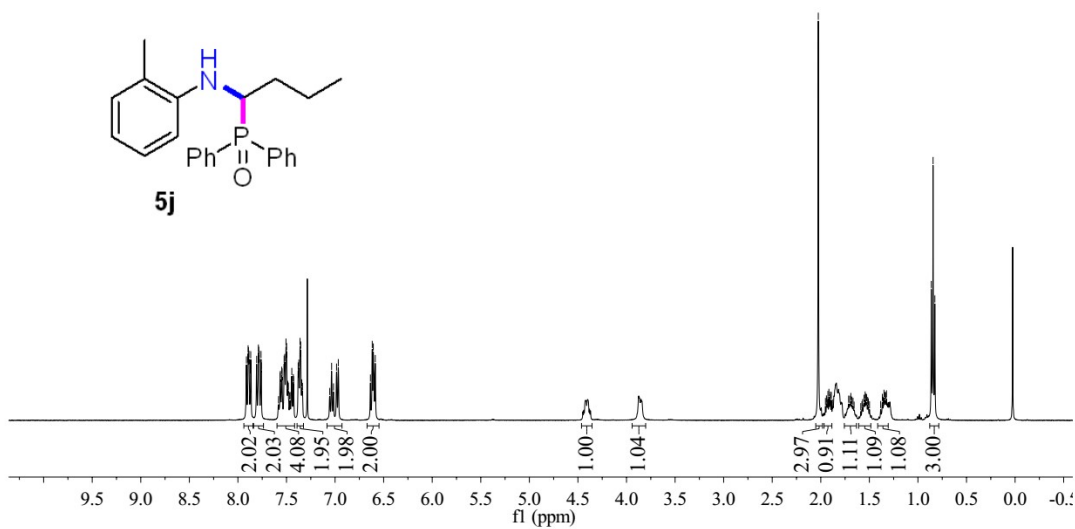

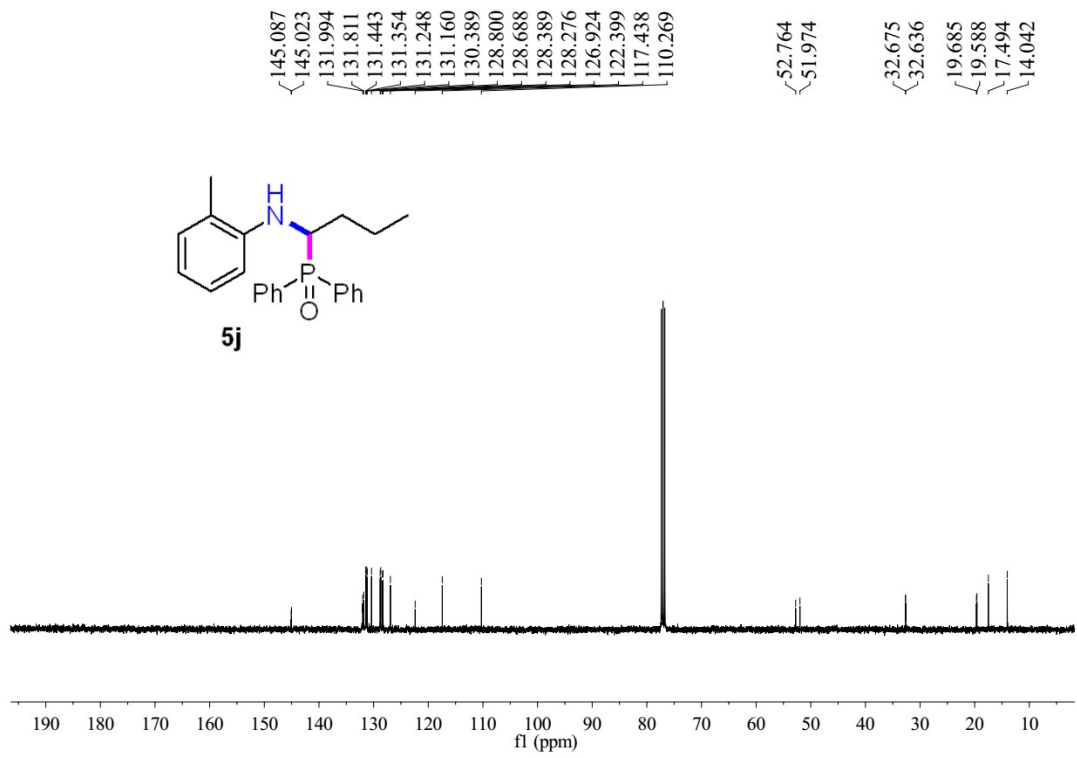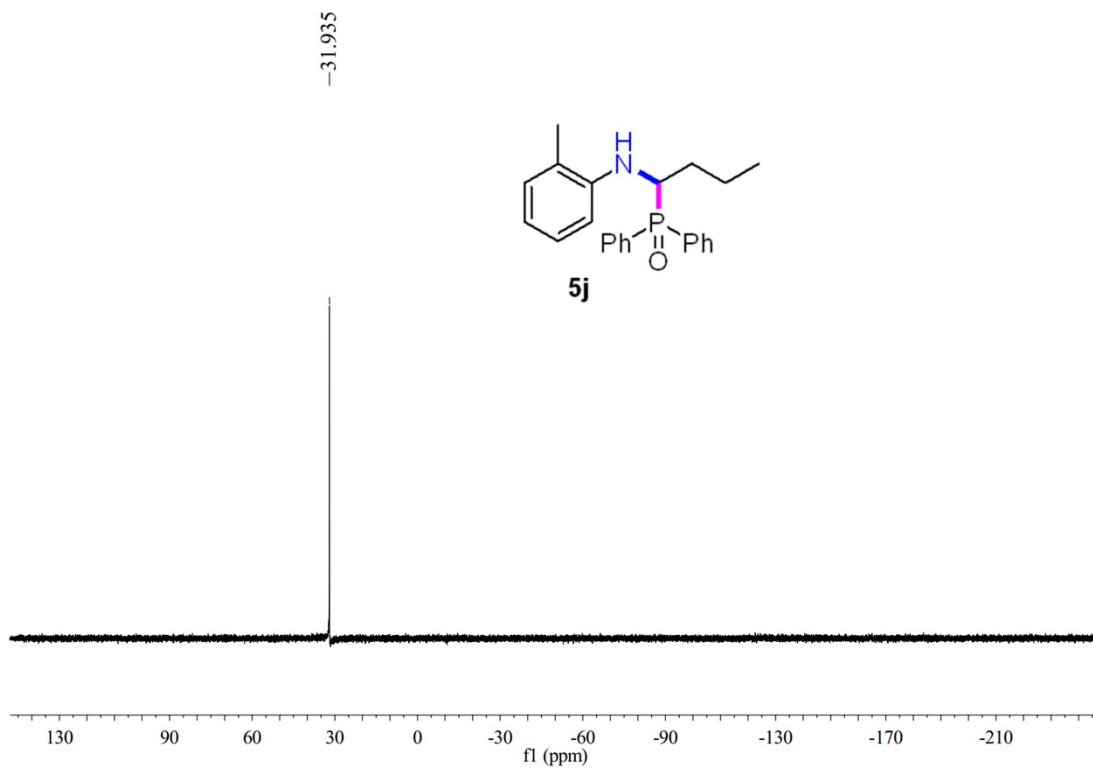



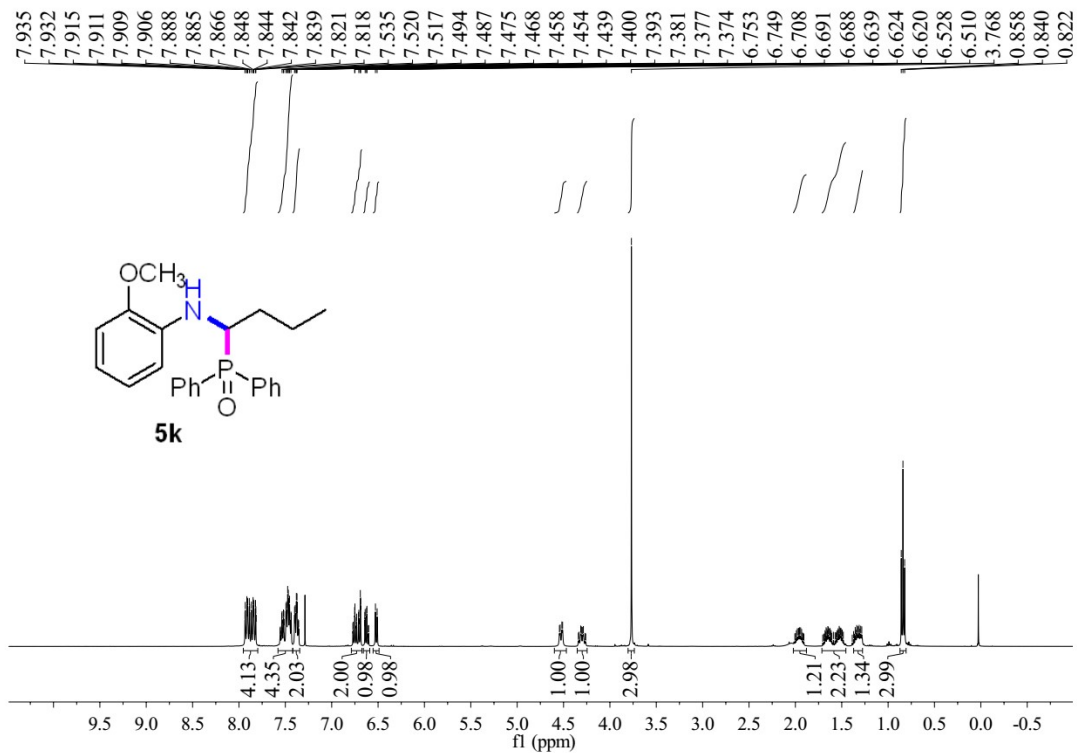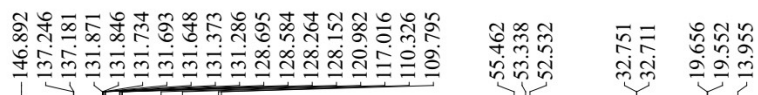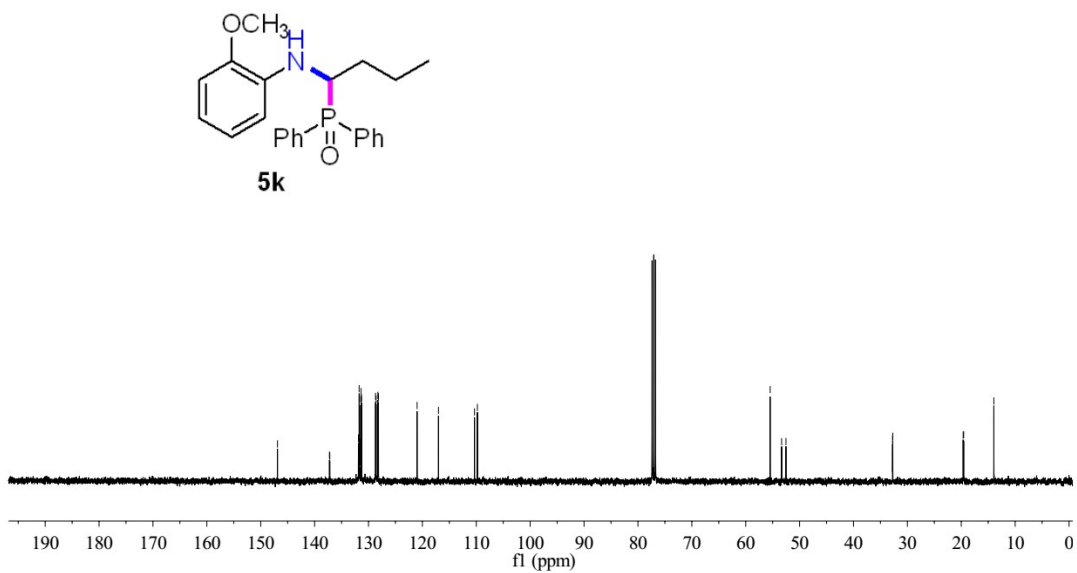

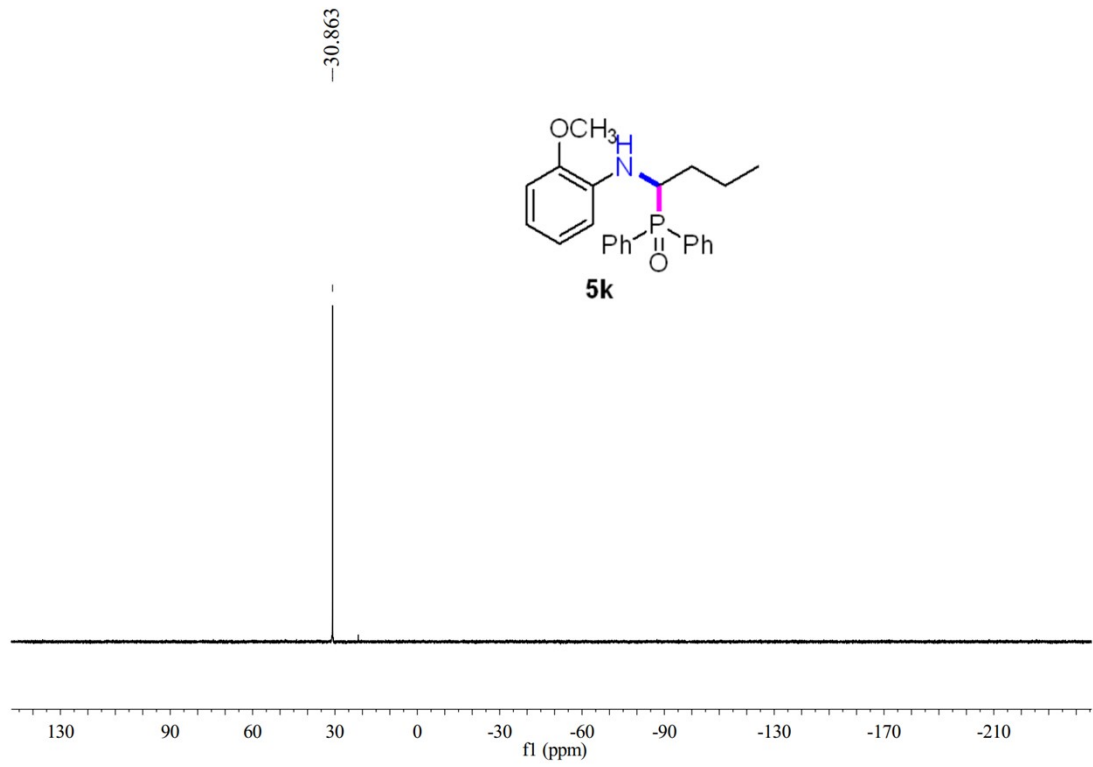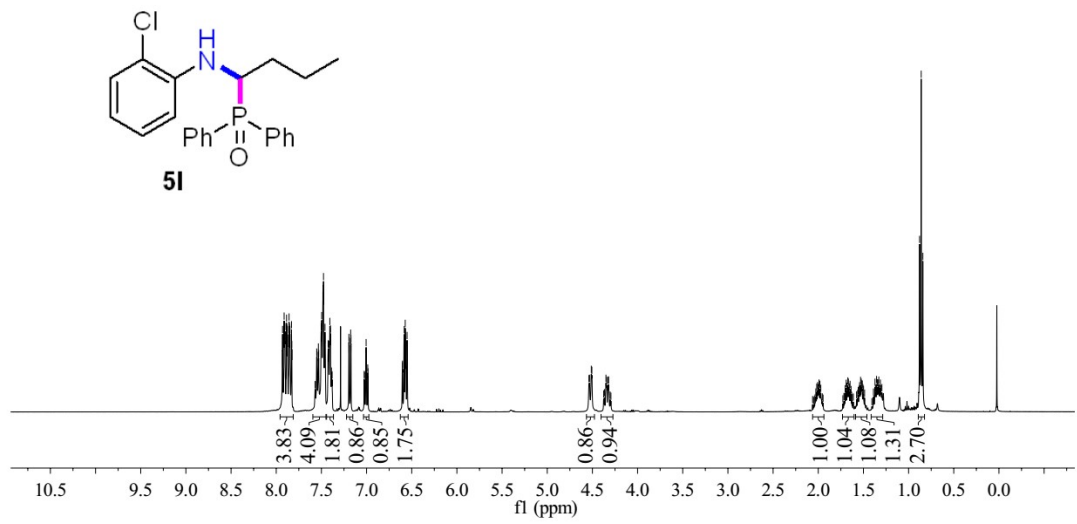

143.035  
 142.975  
 132.099  
 132.015  
 131.726  
 131.639  
 131.370  
 131.283  
 129.354  
 128.802  
 128.690  
 128.504  
 128.391  
 127.587  
 117.905  
 53.478  
 52.679  
 32.621  
 32.584  
 19.648  
 19.544  
 13.910

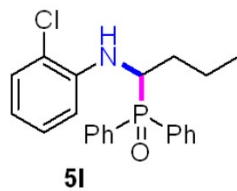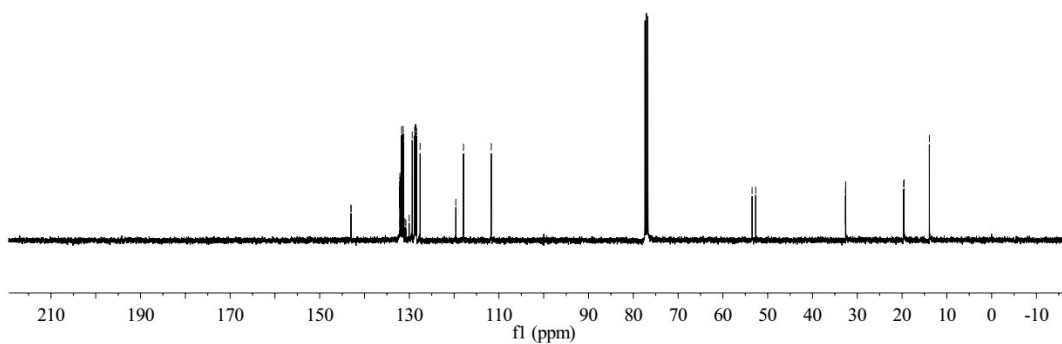

-30.388

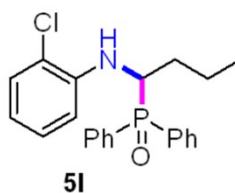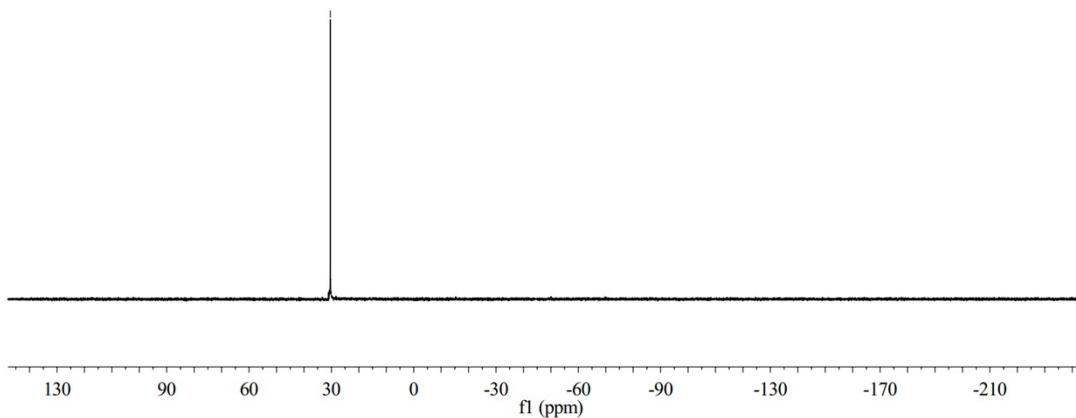

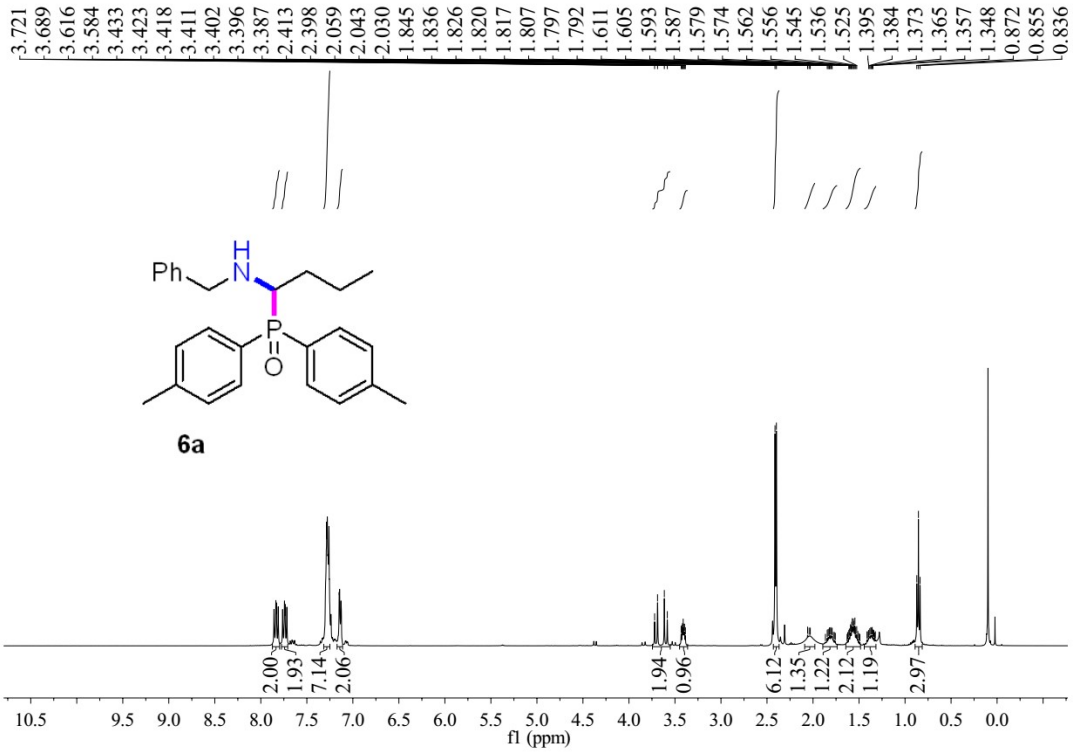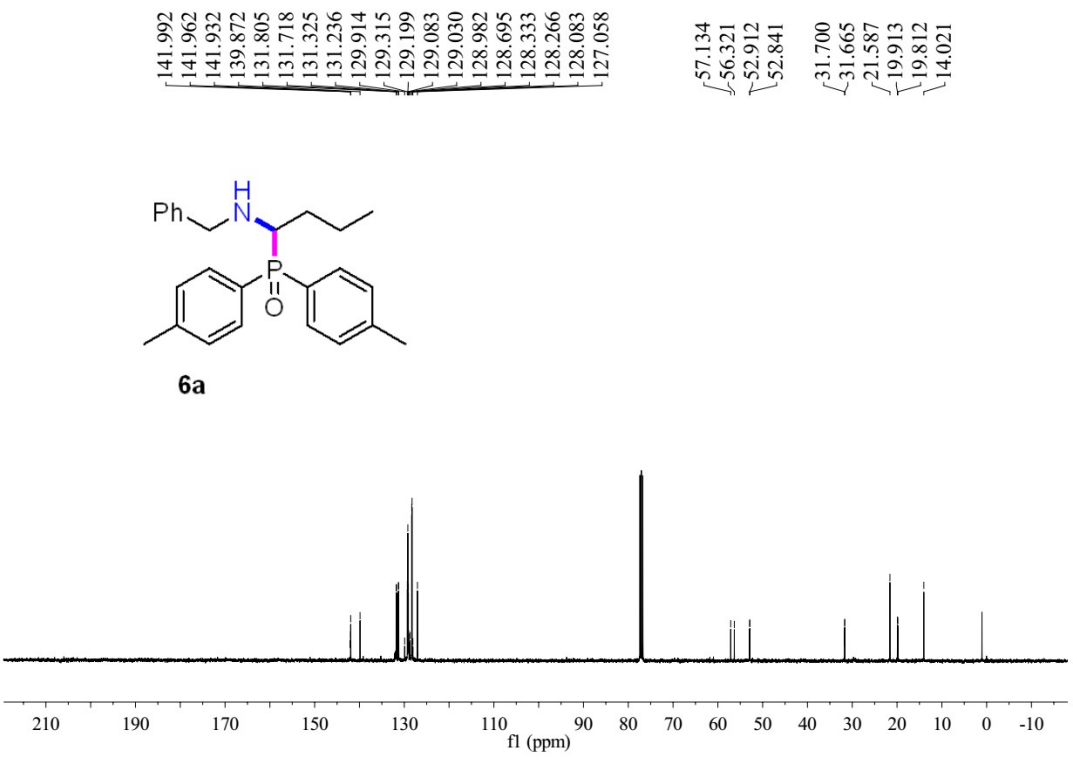

-31.885

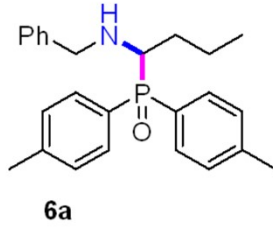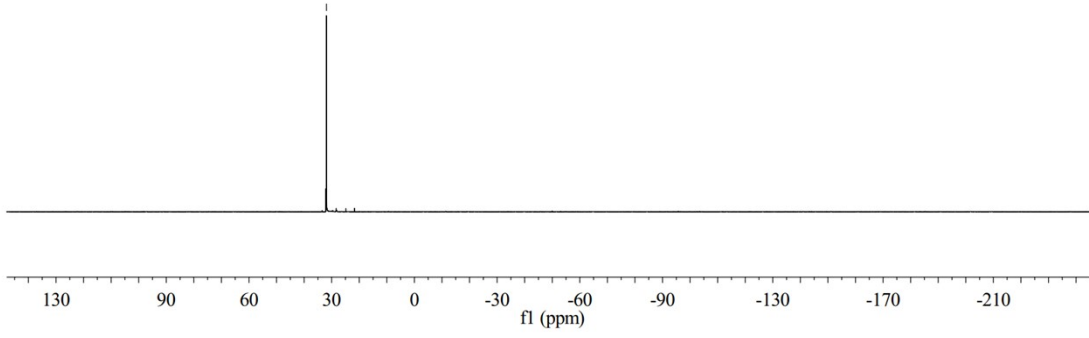

7.895  
7.874  
7.870  
7.849  
7.814  
7.793  
7.788  
7.767  
7.469  
7.464  
7.448  
7.443  
7.320  
7.313  
7.299  
7.281  
7.268  
7.131  
7.127  
7.112  
3.755  
3.723  
3.607  
3.575  
3.427  
3.417  
3.407  
3.398  
3.388  
2.011  
1.575  
1.563  
1.556  
1.544  
1.526  
1.515  
1.492  
1.393  
1.378  
1.365  
1.357  
0.893  
0.876  
0.858

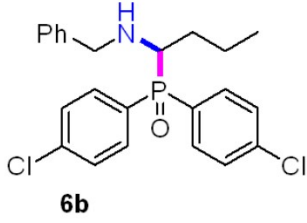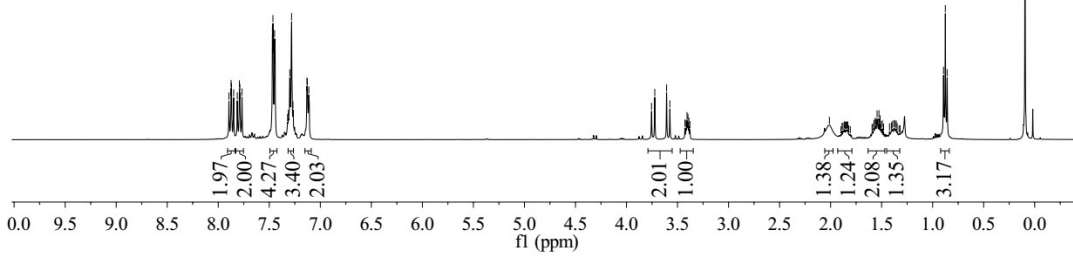

139.244  
138.527  
138.494  
138.469  
138.435  
133.282  
133.193  
132.745  
132.652  
131.335  
130.407  
130.165  
129.227  
129.025  
128.910  
128.863  
128.748  
128.449  
128.378  
128.300  
127.350

57.228  
56.377  
53.201  
53.117

31.751  
31.716  
19.858  
19.758  
14.033

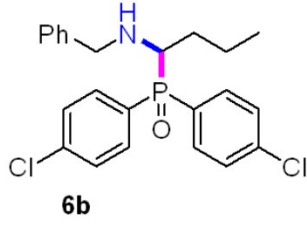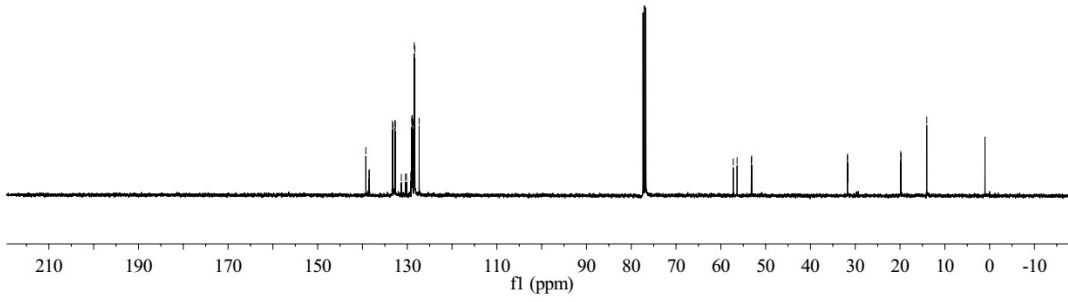

29.906

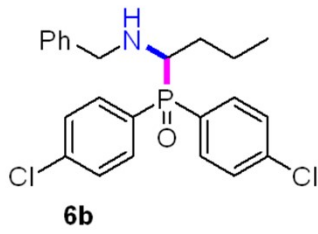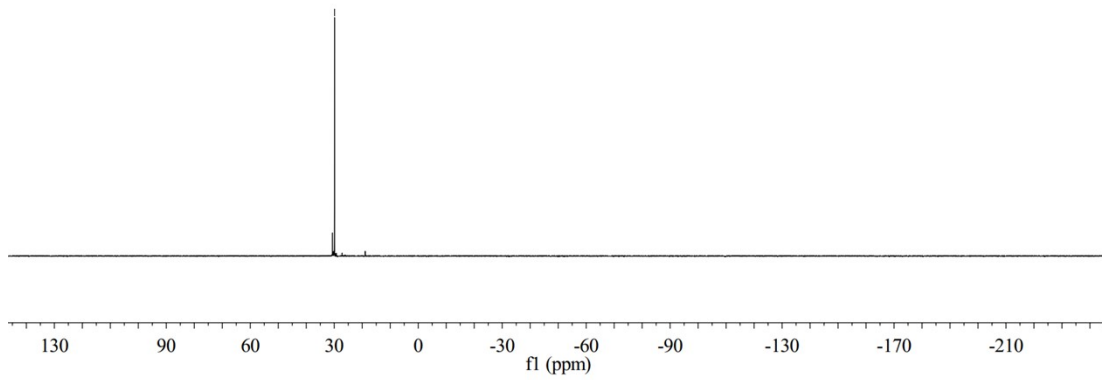

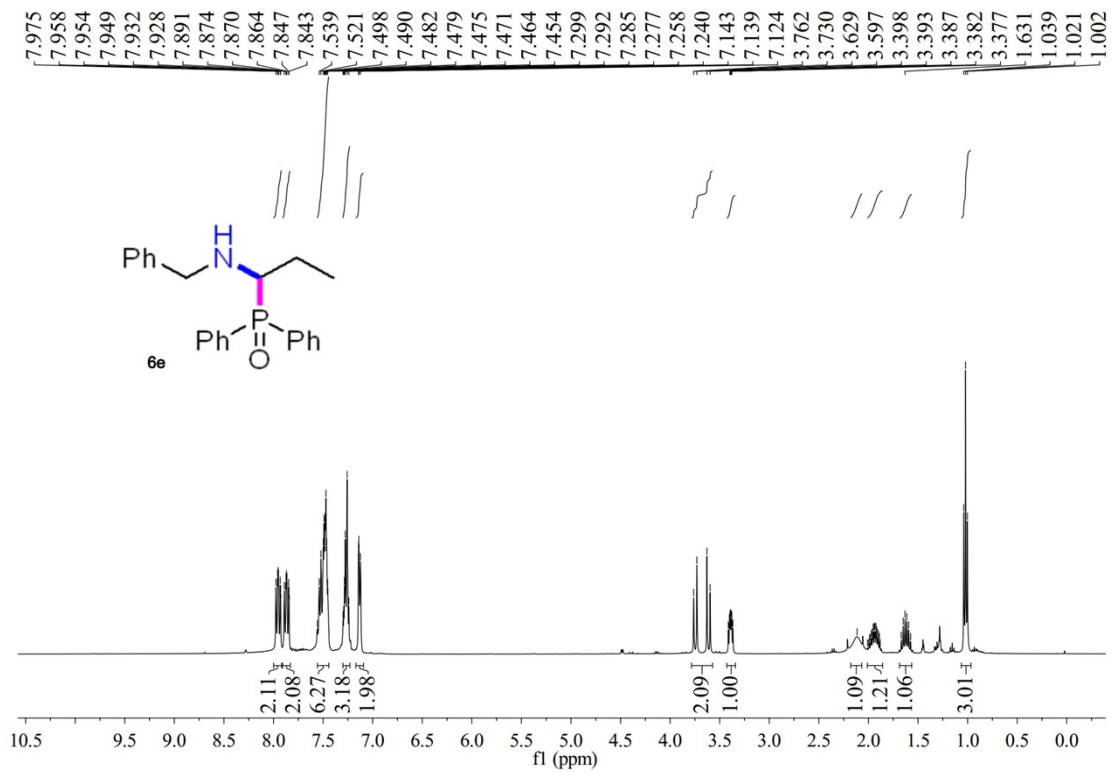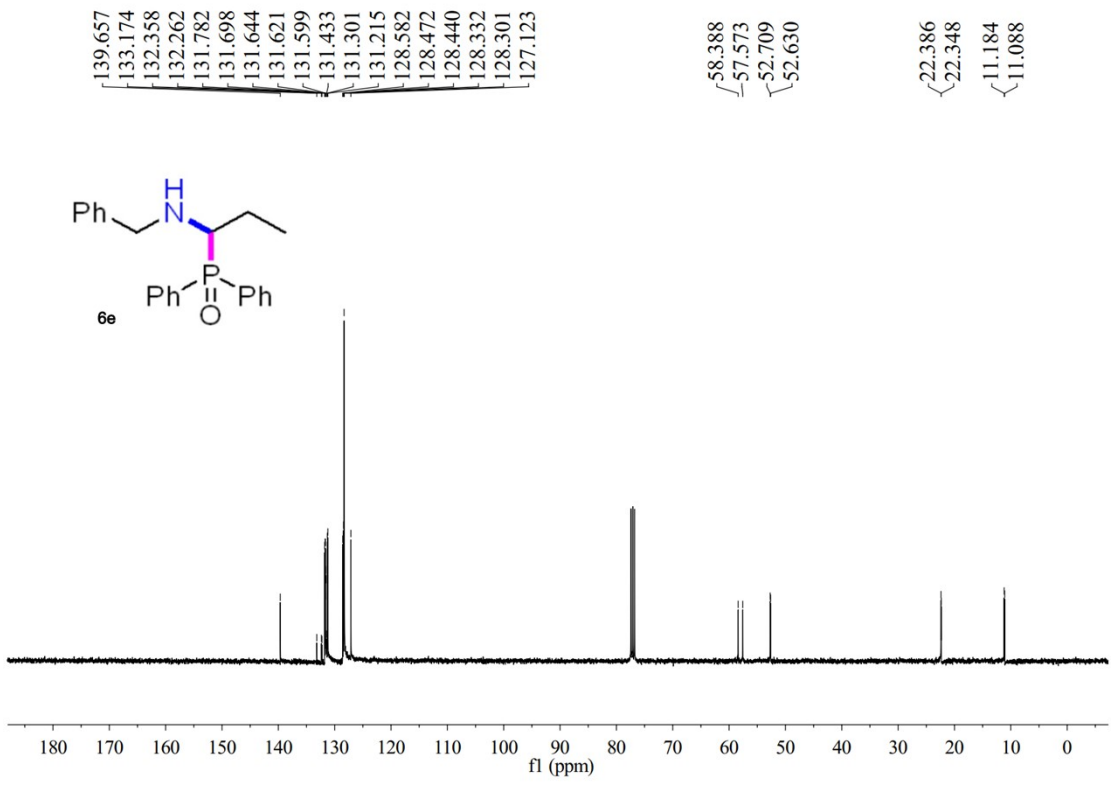

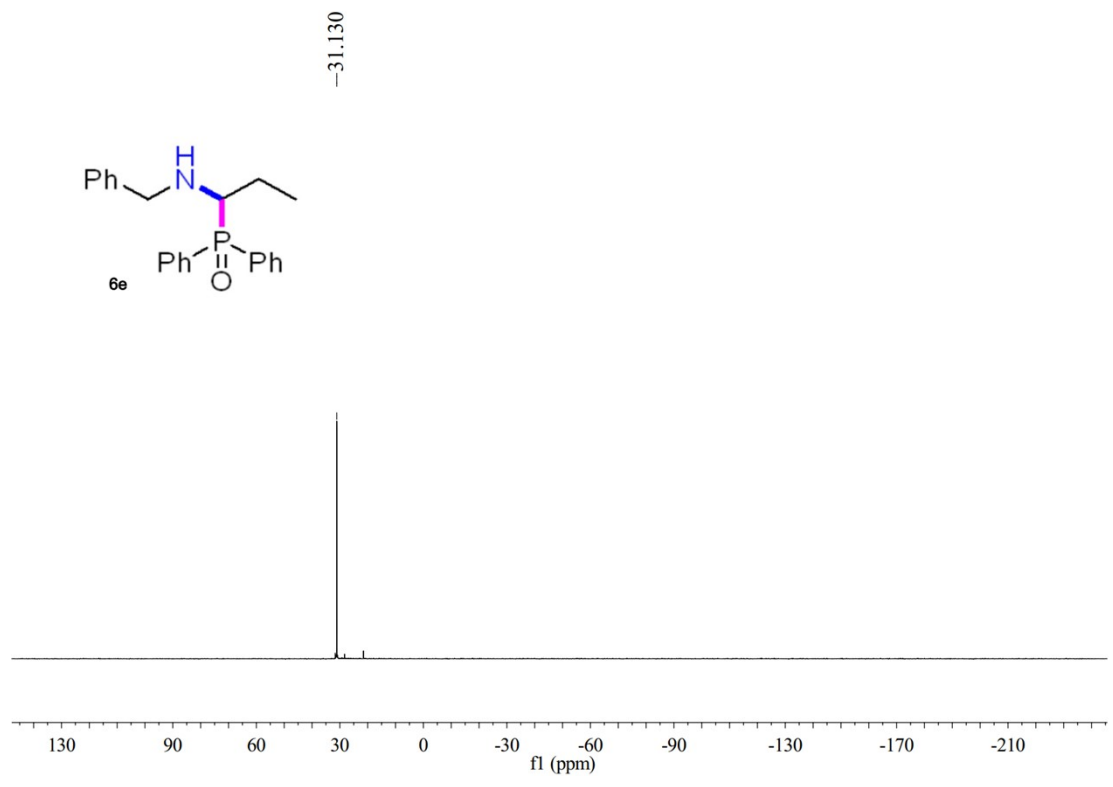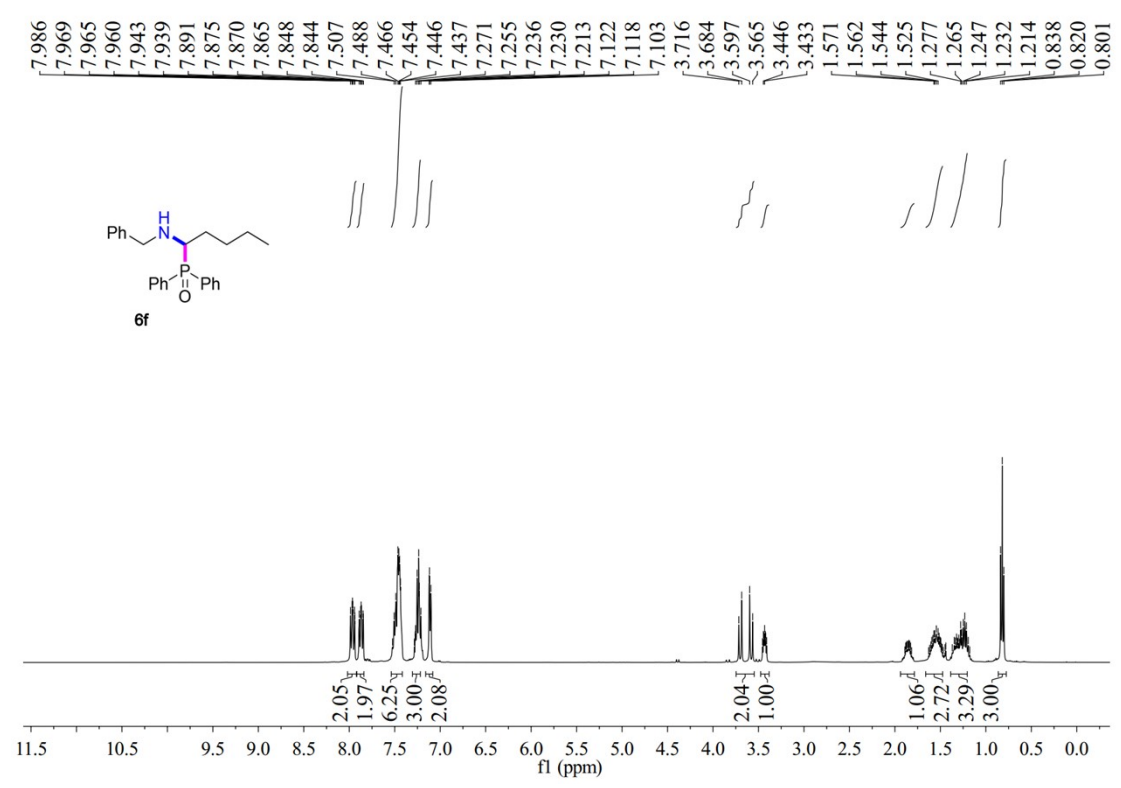



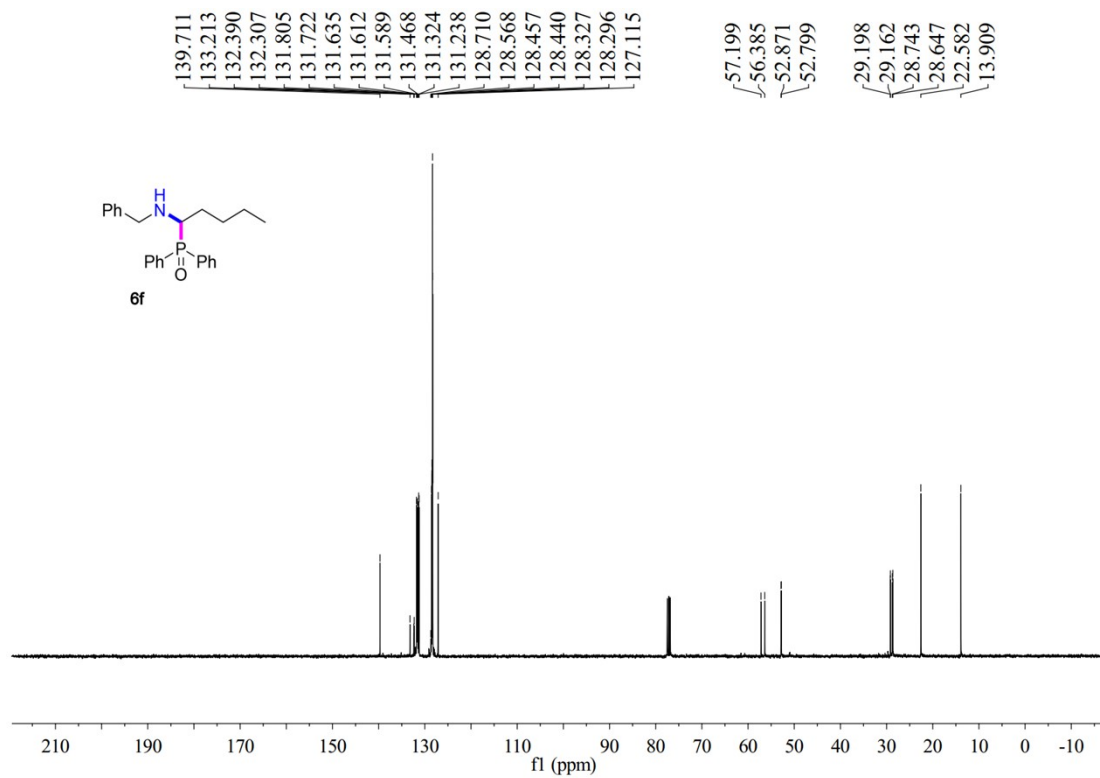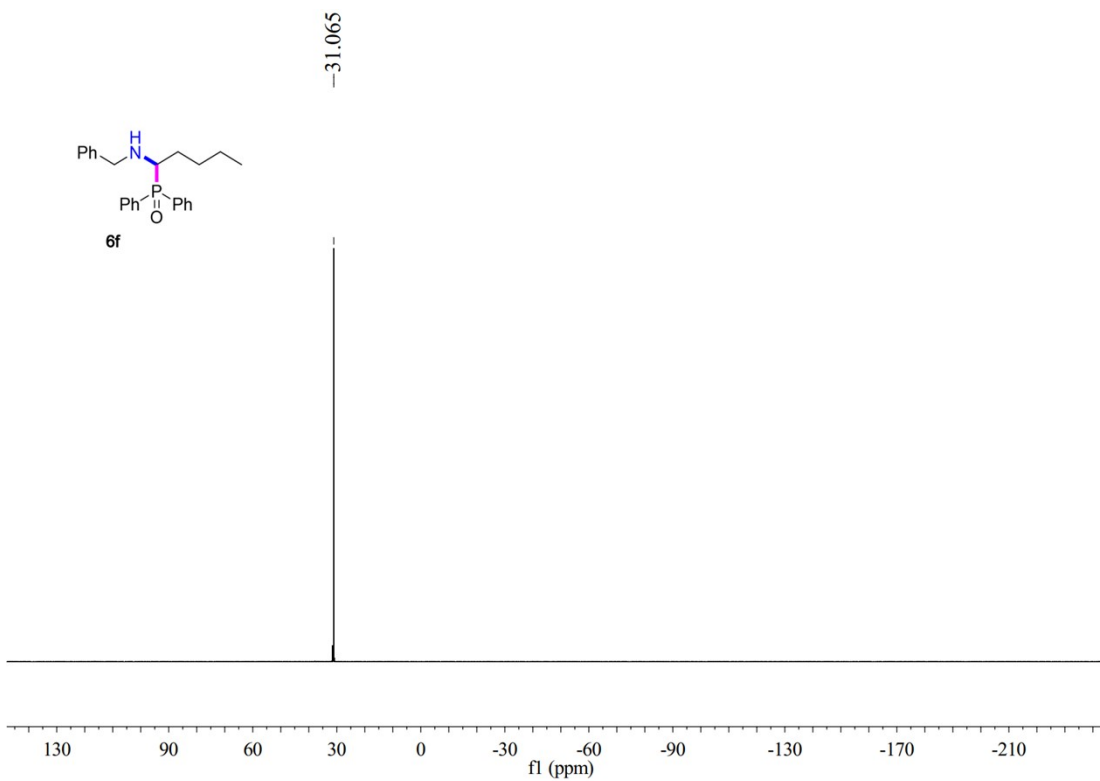

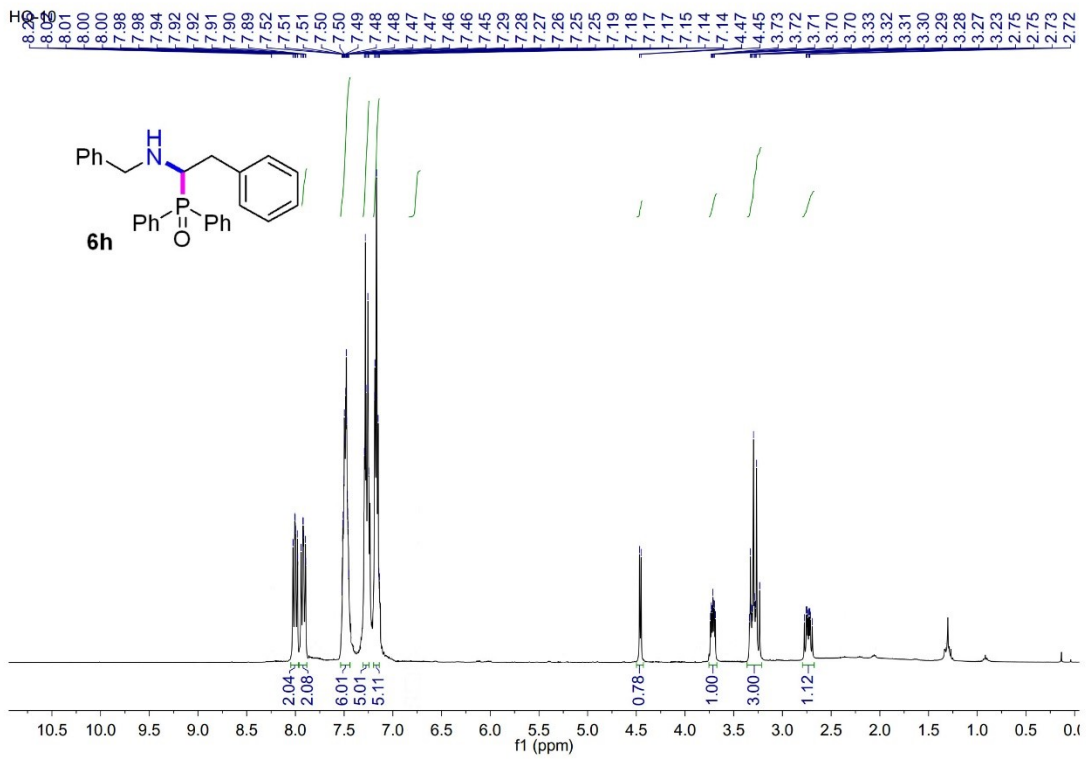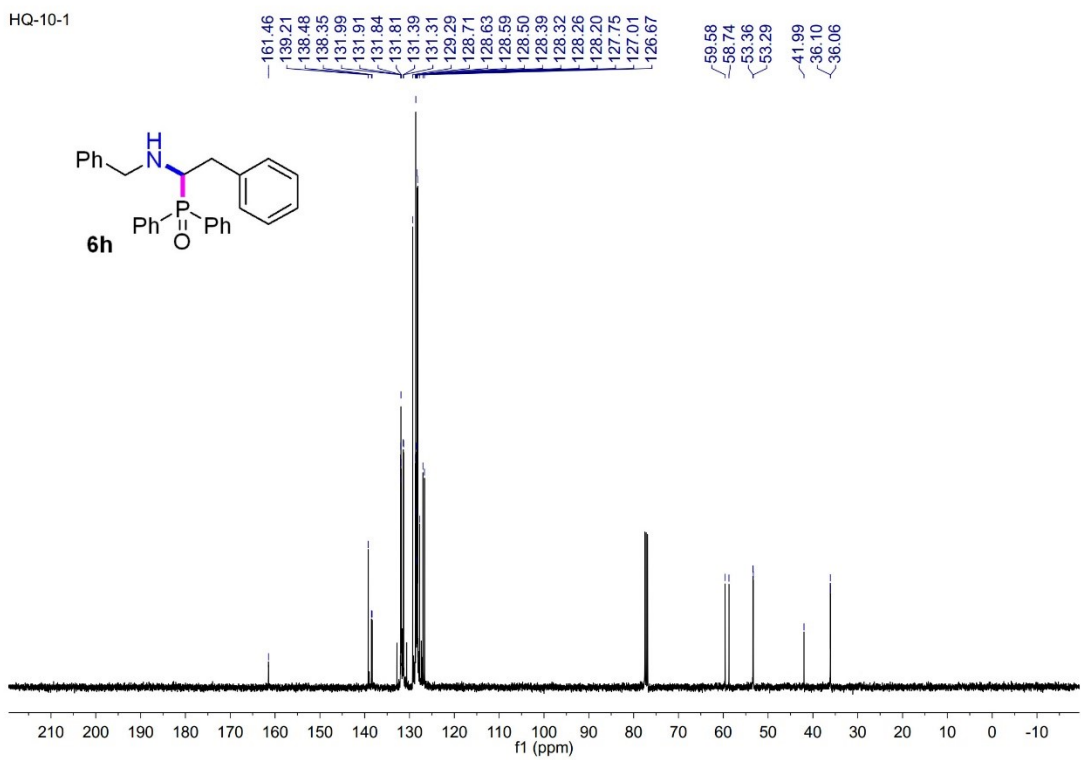

HQ-10-1

— 30.58

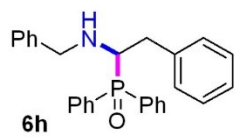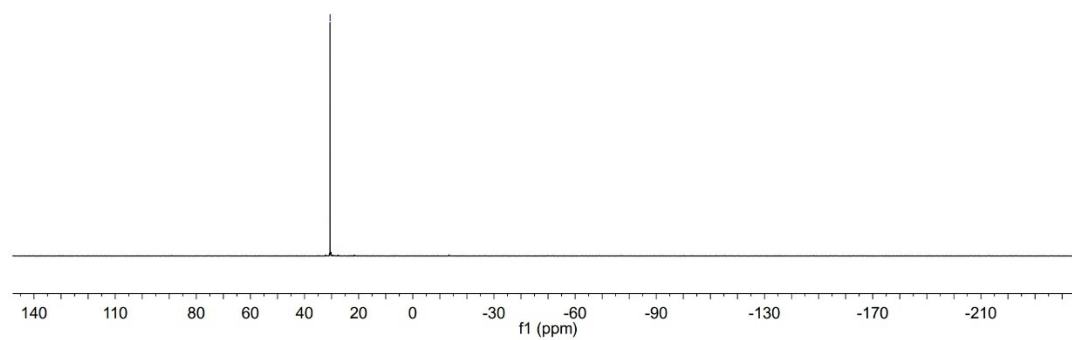

Supplement: d4ob00302k1.pdf [file d4ob00302k1.pdf]
